# Supplementary material
Source: publisher figshare collection journal article supplement (https://acs.figshare.com/ndownloader/files/5872608)
Supplement: Supplementary file 1 [file 5872608]

# om0100030.cif

data_global
 
#=======================================================================
 
# 1. SUBMISSION DETAILS
#----------------------
 
_publ_contact_author_name              Leslie D. Field   
_publ_contact_author_address               
;    
  School of Chemistry, 
  University of Sydney, 
  NSW 2006, Australia
;
_publ_contact_author_email             l.field@chem.usyd.edu.au
_publ_contact_author_fax               +61-2-9351-6650
_publ_contact_author_phone             +61 2 9351 2060 
 
_publ_requested_journal                ?    
;
;
 
loop_
_publ_author_name
_publ_author_address                       
  Leslie D. Field                                       
;    
  School of Chemistry, 
  University of Sydney, 
  NSW 2006, Australia
;
   Warren J. Shaw                                     
;    
  School of Chemistry, 
  University of Sydney, 
  NSW 2006, Australia
;
   Peter Turner                                     
;    
  School of Chemistry, 
  University of Sydney, 
  NSW 2006, Australia
;
 
#=======================================================================
#  Data block for single structure (one for each study in the paper)
#=======================================================================

 
data_ldf111 
 
_audit_creation_method            SHELXL-97 
_chemical_name_systematic 
; 
 ? 
; 
_chemical_name_common             ? 
_chemical_melting_point           ? 
_chemical_formula_moiety          ? 
_chemical_formula_sum 
 'C26 H44 Fe N2 P4 S2' 
_chemical_formula_weight          628.48 
 
loop_ 
 _atom_type_symbol 
 _atom_type_description 
 _atom_type_scat_dispersion_real 
 _atom_type_scat_dispersion_imag 
 _atom_type_scat_source 
 'C'  'C'   0.0033   0.0016 
 'International Tables Vol C Tables 4.2.6.8 and 6.1.1.4' 
 'H'  'H'   0.0000   0.0000 
 'International Tables Vol C Tables 4.2.6.8 and 6.1.1.4' 
 'Fe'  'Fe'   0.3463   0.8444 
 'International Tables Vol C Tables 4.2.6.8 and 6.1.1.4' 
 'N'  'N'   0.0061   0.0033 
 'International Tables Vol C Tables 4.2.6.8 and 6.1.1.4' 
 'P'  'P'   0.1023   0.0942 
 'International Tables Vol C Tables 4.2.6.8 and 6.1.1.4' 
 'S'  'S'   0.1246   0.1234 
 'International Tables Vol C Tables 4.2.6.8 and 6.1.1.4' 
 
_symmetry_cell_setting                 monoclinic
_symmetry_space_group_name_H-M        'P 21/c     '
_symmetry_Int_Tables_number            14
 
loop_ 
 _symmetry_equiv_pos_as_xyz 
 'x, y, z' 
 '-x, y+1/2, -z+1/2' 
 '-x, -y, -z' 
 'x, -y-1/2, z-1/2' 
 
_cell_length_a                    10.669(3) 
_cell_length_b                    9.176(3) 
_cell_length_c                    16.199(5) 
_cell_angle_alpha                 90.00 
_cell_angle_beta                  104.836(5) 
_cell_angle_gamma                 90.00 
_cell_volume                      1533.0(8) 
_cell_formula_units_Z             2 
_cell_measurement_temperature     173(2) 
_cell_measurement_reflns_used     916
_cell_measurement_theta_min       2.573
_cell_measurement_theta_max       28.143
 
_exptl_crystal_description        blade
_exptl_crystal_colour             brown
_exptl_crystal_size_max           0.411
_exptl_crystal_size_mid           0.334
_exptl_crystal_size_min           0.096
_exptl_crystal_density_meas       ? 
_exptl_crystal_density_diffrn     1.362 
_exptl_crystal_density_method     'not measured' 
_exptl_crystal_F_000              664 
_exptl_absorpt_coefficient_mu     0.856 
_exptl_absorpt_correction_type    empirical
_exptl_absorpt_correction_T_min   0.853
_exptl_absorpt_correction_T_max   1.000
_exptl_absorpt_process_details    'SADABS (Sheldrick, 1996)'
 
_exptl_special_details 
; 
 ? 
; 
 
_diffrn_ambient_temperature       173(2) 
_diffrn_radiation_wavelength      0.71073 
_diffrn_radiation_type            MoK\a 
_diffrn_radiation_source          'sealed tube' 
_diffrn_radiation_monochromator   graphite 
_diffrn_measurement_device_type   'Bruker SMART 1000 CCD'
_diffrn_measurement_method        \w
_diffrn_detector_area_resol_mean  ? 
_diffrn_standards_number          189
_diffrn_standards_interval_count  ? 
_diffrn_standards_interval_time   ? 
_diffrn_standards_decay_%         0.000
_diffrn_reflns_number             13795
_diffrn_reflns_av_R_equivalents   0.0208
_diffrn_reflns_av_sigmaI/netI     0.0143 
_diffrn_reflns_limit_h_min        -14 
_diffrn_reflns_limit_h_max        14 
_diffrn_reflns_limit_k_min        -12
_diffrn_reflns_limit_k_max        11 
_diffrn_reflns_limit_l_min        -20
_diffrn_reflns_limit_l_max        21 
_diffrn_reflns_theta_min          1.97 
_diffrn_reflns_theta_max          28.31 
_reflns_number_total              3617 
_reflns_number_gt                 3311 
_reflns_threshold_expression      >2sigma(I) 
 
_computing_data_collection        'SMART (Bruker,1995)'
_computing_cell_refinement        'SAINT (Bruker,1995)'
_computing_data_reduction         'SAINT and XPREP'
_computing_structure_solution     'SIR97 (Altomare, et. al. 1997)' 
_computing_structure_refinement   'SHELXL-97 (Sheldrick, 1997)' 
_computing_molecular_graphics     'teXsan for Windows (MSC, 1997)'
_computing_publication_material   ? 
 
_refine_special_details 
; 
 Refinement of F^2^ against ALL reflections.  The weighted R-factor wR and 
 goodness of fit S are based on F^2^, conventional R-factors R are based 
 on F, with F set to zero for negative F^2^. The threshold expression of 
 F^2^ > 2sigma(F^2^) is used only for calculating R-factors(gt) etc. and is 
 not relevant to the choice of reflections for refinement.  R-factors based 
 on F^2^ are statistically about twice as large as those based on F, and R- 
 factors based on ALL data will be even larger. 
; 
 
_refine_ls_structure_factor_coef  Fsqd  
_refine_ls_matrix_type            full 
_refine_ls_weighting_scheme       calc  
_refine_ls_weighting_details 
 'calc w=1/[\s^2^(Fo^2^)+(0.0438P)^2^+2.5145P] where P=(Fo^2^+2Fc^2^)/3' 
_atom_sites_solution_primary      direct 
_atom_sites_solution_secondary    difmap 
_atom_sites_solution_hydrogens    geom 
_refine_ls_hydrogen_treatment     mixed 
_refine_ls_extinction_method      none 
_refine_ls_extinction_coef        ? 
_refine_ls_number_reflns          3617 
_refine_ls_number_parameters      162 
_refine_ls_number_restraints      0 
_refine_ls_R_factor_all           0.0352 
_refine_ls_R_factor_gt            0.0318 
_refine_ls_wR_factor_ref          0.0810 
_refine_ls_wR_factor_gt           0.0771 
_refine_ls_goodness_of_fit_ref    0.790 
_refine_ls_restrained_S_all       0.790 
_refine_ls_shift/su_max           0.006 
_refine_ls_shift/su_mean          0.000 
 
loop_ 
 _atom_site_label 
 _atom_site_type_symbol 
 _atom_site_fract_x 
 _atom_site_fract_y 
 _atom_site_fract_z 
 _atom_site_U_iso_or_equiv 
 _atom_site_adp_type 
 _atom_site_occupancy 
 _atom_site_symmetry_multiplicity 
 _atom_site_calc_flag 
 _atom_site_refinement_flags 
 _atom_site_disorder_assembly 
 _atom_site_disorder_group 
Fe1 Fe 0.5000 0.5000 0.5000 0.02087(9) Uani 1 2 d S . . 
S1 S 0.55556(4) 0.66053(5) 0.61432(3) 0.03193(11) Uani 1 1 d . . . 
P1 P 0.29448(4) 0.55976(6) 0.49860(3) 0.03369(12) Uani 1 1 d . . . 
P2 P 0.48602(5) 0.33281(5) 0.59911(3) 0.03010(11) Uani 1 1 d . . . 
N1 N 0.76217(15) 0.81863(17) 0.59491(10) 0.0304(3) Uani 1 1 d . . . 
C1 C 0.2525(2) 0.7449(4) 0.5237(2) 0.0771(10) Uani 1 1 d . A . 
H1A H 0.1675 0.7442 0.5363 0.116 Uiso 1 1 calc R . . 
H1B H 0.2495 0.8086 0.4747 0.116 Uiso 1 1 calc R . . 
H1C H 0.3180 0.7810 0.5735 0.116 Uiso 1 1 calc R . . 
C2 C 0.1604(2) 0.5250(3) 0.40632(18) 0.0557(7) Uani 1 1 d . A . 
H2A H 0.1601 0.4218 0.3906 0.083 Uiso 1 1 calc R . . 
H2B H 0.1701 0.5852 0.3584 0.083 Uiso 1 1 calc R . . 
H2C H 0.0786 0.5491 0.4201 0.083 Uiso 1 1 calc R . . 
C3A C 0.2622(4) 0.4889(4) 0.5969(3) 0.0336(8) Uiso 0.50 1 d P A 1 
H3A1 H 0.3078 0.5480 0.6467 0.040 Uiso 0.50 1 calc PR A 1 
H3A2 H 0.1681 0.4910 0.5930 0.040 Uiso 0.50 1 calc PR A 1 
C4A C 0.3128(4) 0.3318(4) 0.6056(3) 0.0329(7) Uiso 0.50 1 d P A 1 
H4A1 H 0.2596 0.2708 0.5593 0.039 Uiso 0.50 1 calc PR A 1 
H4A2 H 0.3072 0.2904 0.6610 0.039 Uiso 0.50 1 calc PR A 1 
C3B C 0.2362(4) 0.4162(5) 0.5653(3) 0.0388(8) Uiso 0.50 1 d P A 2 
H3B1 H 0.1624 0.4547 0.5853 0.047 Uiso 0.50 1 calc PR A 2 
H3B2 H 0.2066 0.3283 0.5304 0.047 Uiso 0.50 1 calc PR A 2 
C4B C 0.3470(4) 0.3778(5) 0.6408(3) 0.0375(8) Uiso 0.50 1 d P A 2 
H4B1 H 0.3235 0.2935 0.6719 0.045 Uiso 0.50 1 calc PR A 2 
H4B2 H 0.3680 0.4613 0.6806 0.045 Uiso 0.50 1 calc PR A 2 
C5 C 0.5962(3) 0.3362(3) 0.70567(14) 0.0662(8) Uani 1 1 d . A . 
H5A H 0.5965 0.4339 0.7301 0.099 Uiso 1 1 calc R . . 
H5B H 0.6839 0.3112 0.7021 0.099 Uiso 1 1 calc R . . 
H5C H 0.5673 0.2652 0.7421 0.099 Uiso 1 1 calc R . . 
C6 C 0.4872(3) 0.1390(2) 0.57758(15) 0.0551(6) Uani 1 1 d . A . 
H6A H 0.4708 0.0847 0.6259 0.083 Uiso 1 1 calc R . . 
H6B H 0.5720 0.1112 0.5695 0.083 Uiso 1 1 calc R . . 
H6C H 0.4195 0.1163 0.5257 0.083 Uiso 1 1 calc R . . 
C7 C 0.67865(17) 0.78549(19) 0.63641(11) 0.0291(3) Uani 1 1 d . . . 
H7 H 0.6864 0.8390 0.6877 0.035 Uiso 1 1 calc R . . 
C8 C 0.85749(17) 0.92508(19) 0.63001(11) 0.0285(3) Uani 1 1 d . . . 
C9 C 0.84879(19) 1.0283(2) 0.69193(13) 0.0355(4) Uani 1 1 d . . . 
H9 H 0.7747 1.0295 0.7142 0.043 Uiso 1 1 calc R . . 
C10 C 0.9473(2) 1.1288(2) 0.72106(13) 0.0423(5) Uani 1 1 d . . . 
H10 H 0.9404 1.1979 0.7634 0.051 Uiso 1 1 calc R . . 
C11 C 1.0554(2) 1.1293(3) 0.68904(14) 0.0456(5) Uani 1 1 d . . . 
H11 H 1.1225 1.1987 0.7089 0.055 Uiso 1 1 calc R . . 
C12 C 1.0652(2) 1.0282(3) 0.62802(16) 0.0470(5) Uani 1 1 d . . . 
H12 H 1.1398 1.0274 0.6063 0.056 Uiso 1 1 calc R . . 
C13 C 0.96689(19) 0.9277(2) 0.59815(13) 0.0381(4) Uani 1 1 d . . . 
H13 H 0.9743 0.8598 0.5554 0.046 Uiso 1 1 calc R . . 
 
loop_ 
 _atom_site_aniso_label 
 _atom_site_aniso_U_11 
 _atom_site_aniso_U_22 
 _atom_site_aniso_U_33 
 _atom_site_aniso_U_23 
 _atom_site_aniso_U_13 
 _atom_site_aniso_U_12 
Fe1 0.02062(16) 0.02348(17) 0.02041(16) -0.00292(11) 0.00869(12) -0.00231(11) 
S1 0.0355(2) 0.0357(2) 0.0286(2) -0.01157(17) 0.01554(18) -0.01122(18) 
P1 0.0233(2) 0.0445(3) 0.0358(3) 0.0003(2) 0.01225(18) 0.00357(19) 
P2 0.0348(2) 0.0296(2) 0.0288(2) 0.00256(17) 0.01346(18) -0.00278(18) 
N1 0.0310(7) 0.0304(7) 0.0302(7) -0.0062(6) 0.0088(6) -0.0047(6) 
C1 0.0383(12) 0.084(2) 0.104(2) -0.0556(19) 0.0087(13) 0.0179(13) 
C2 0.0272(10) 0.0526(13) 0.0768(17) -0.0196(12) -0.0056(10) 0.0089(9) 
C5 0.109(2) 0.0556(15) 0.0255(10) 0.0078(10) 0.0017(12) -0.0271(15) 
C6 0.0851(18) 0.0301(10) 0.0405(12) 0.0058(9) -0.0014(12) -0.0038(11) 
C7 0.0321(8) 0.0290(8) 0.0255(8) -0.0058(6) 0.0062(7) -0.0037(7) 
C8 0.0293(8) 0.0277(8) 0.0265(8) 0.0006(6) 0.0035(7) -0.0019(7) 
C9 0.0352(9) 0.0356(9) 0.0359(10) -0.0057(8) 0.0093(8) -0.0067(8) 
C10 0.0473(11) 0.0392(10) 0.0366(10) -0.0076(8) 0.0038(9) -0.0111(9) 
C11 0.0371(10) 0.0483(12) 0.0459(12) -0.0007(9) 0.0007(9) -0.0176(9) 
C12 0.0326(10) 0.0553(13) 0.0548(13) -0.0004(11) 0.0142(9) -0.0107(9) 
C13 0.0344(10) 0.0401(10) 0.0418(10) -0.0041(8) 0.0131(8) -0.0039(8) 
 
_geom_special_details 
; 
 All esds (except the esd in the dihedral angle between two l.s. planes) 
 are estimated using the full covariance matrix.  The cell esds are taken 
 into account individually in the estimation of esds in distances, angles 
 and torsion angles; correlations between esds in cell parameters are only 
 used when they are defined by crystal symmetry.  An approximate (isotropic) 
 treatment of cell esds is used for estimating esds involving l.s. planes. 
; 
 
loop_ 
 _geom_bond_atom_site_label_1 
 _geom_bond_atom_site_label_2 
 _geom_bond_distance 
 _geom_bond_site_symmetry_2 
 _geom_bond_publ_flag 
Fe1 P2 2.2529(7) . ? 
Fe1 P2 2.2530(7) 3_666 ? 
Fe1 P1 2.2547(8) . ? 
Fe1 P1 2.2547(8) 3_666 ? 
Fe1 S1 2.3213(7) . ? 
Fe1 S1 2.3213(7) 3_666 ? 
S1 C7 1.7108(18) . ? 
P1 C2 1.813(2) . ? 
P1 C1 1.829(3) . ? 
P1 C3A 1.833(4) . ? 
P1 C3B 1.906(4) . ? 
P2 C6 1.813(2) . ? 
P2 C5 1.823(2) . ? 
P2 C4B 1.827(4) . ? 
P2 C4A 1.878(4) . ? 
N1 C7 1.283(2) . ? 
N1 C8 1.420(2) . ? 
C1 H1A 0.9800 . ? 
C1 H1B 0.9800 . ? 
C1 H1C 0.9800 . ? 
C2 H2A 0.9800 . ? 
C2 H2B 0.9800 . ? 
C2 H2C 0.9800 . ? 
C3A C4A 1.534(5) . ? 
C3A H3A1 0.9900 . ? 
C3A H3A2 0.9900 . ? 
C4A H4A1 0.9900 . ? 
C4A H4A2 0.9900 . ? 
C3B C4B 1.509(6) . ? 
C3B H3B1 0.9900 . ? 
C3B H3B2 0.9900 . ? 
C4B H4B1 0.9900 . ? 
C4B H4B2 0.9900 . ? 
C5 H5A 0.9800 . ? 
C5 H5B 0.9800 . ? 
C5 H5C 0.9800 . ? 
C6 H6A 0.9800 . ? 
C6 H6B 0.9800 . ? 
C6 H6C 0.9800 . ? 
C7 H7 0.9500 . ? 
C8 C13 1.392(3) . ? 
C8 C9 1.400(3) . ? 
C9 C10 1.387(3) . ? 
C9 H9 0.9500 . ? 
C10 C11 1.380(3) . ? 
C10 H10 0.9500 . ? 
C11 C12 1.379(3) . ? 
C11 H11 0.9500 . ? 
C12 C13 1.388(3) . ? 
C12 H12 0.9500 . ? 
C13 H13 0.9500 . ? 
 
loop_ 
 _geom_angle_atom_site_label_1 
 _geom_angle_atom_site_label_2 
 _geom_angle_atom_site_label_3 
 _geom_angle 
 _geom_angle_site_symmetry_1 
 _geom_angle_site_symmetry_3 
 _geom_angle_publ_flag 
P2 Fe1 P2 180.0 . 3_666 ? 
P2 Fe1 P1 86.05(2) . . ? 
P2 Fe1 P1 93.95(2) 3_666 . ? 
P2 Fe1 P1 93.95(2) . 3_666 ? 
P2 Fe1 P1 86.05(2) 3_666 3_666 ? 
P1 Fe1 P1 180.00(3) . 3_666 ? 
P2 Fe1 S1 85.04(3) . . ? 
P2 Fe1 S1 94.96(3) 3_666 . ? 
P1 Fe1 S1 84.42(2) . . ? 
P1 Fe1 S1 95.58(2) 3_666 . ? 
P2 Fe1 S1 94.96(3) . 3_666 ? 
P2 Fe1 S1 85.04(3) 3_666 3_666 ? 
P1 Fe1 S1 95.58(2) . 3_666 ? 
P1 Fe1 S1 84.42(2) 3_666 3_666 ? 
S1 Fe1 S1 180.0 . 3_666 ? 
C7 S1 Fe1 128.15(6) . . ? 
C2 P1 C1 99.22(12) . . ? 
C2 P1 C3A 111.71(17) . . ? 
C1 P1 C3A 91.44(18) . . ? 
C2 P1 C3B 92.44(17) . . ? 
C1 P1 C3B 112.44(18) . . ? 
C3A P1 C3B 25.98(15) . . ? 
C2 P1 Fe1 121.69(9) . . ? 
C1 P1 Fe1 121.11(9) . . ? 
C3A P1 Fe1 107.69(12) . . ? 
C3B P1 Fe1 106.50(13) . . ? 
C6 P2 C5 99.44(12) . . ? 
C6 P2 C4B 109.82(17) . . ? 
C5 P2 C4B 91.92(18) . . ? 
C6 P2 C4A 93.51(16) . . ? 
C5 P2 C4A 110.60(17) . . ? 
C4B P2 C4A 22.61(15) . . ? 
C6 P2 Fe1 121.73(8) . . ? 
C5 P2 Fe1 121.27(9) . . ? 
C4B P2 Fe1 108.52(13) . . ? 
C4A P2 Fe1 106.81(12) . . ? 
C7 N1 C8 118.41(15) . . ? 
P1 C1 H1A 109.5 . . ? 
P1 C1 H1B 109.5 . . ? 
H1A C1 H1B 109.5 . . ? 
P1 C1 H1C 109.5 . . ? 
H1A C1 H1C 109.5 . . ? 
H1B C1 H1C 109.5 . . ? 
P1 C2 H2A 109.5 . . ? 
P1 C2 H2B 109.5 . . ? 
H2A C2 H2B 109.5 . . ? 
P1 C2 H2C 109.5 . . ? 
H2A C2 H2C 109.5 . . ? 
H2B C2 H2C 109.5 . . ? 
C4A C3A P1 105.8(3) . . ? 
C4A C3A H3A1 110.6 . . ? 
P1 C3A H3A1 110.6 . . ? 
C4A C3A H3A2 110.6 . . ? 
P1 C3A H3A2 110.6 . . ? 
H3A1 C3A H3A2 108.7 . . ? 
C3A C4A P2 108.6(3) . . ? 
C3A C4A H4A1 110.0 . . ? 
P2 C4A H4A1 110.0 . . ? 
C3A C4A H4A2 110.0 . . ? 
P2 C4A H4A2 110.0 . . ? 
H4A1 C4A H4A2 108.4 . . ? 
C4B C3B P1 108.6(3) . . ? 
C4B C3B H3B1 110.0 . . ? 
P1 C3B H3B1 110.0 . . ? 
C4B C3B H3B2 110.0 . . ? 
P1 C3B H3B2 110.0 . . ? 
H3B1 C3B H3B2 108.4 . . ? 
C3B C4B P2 107.2(3) . . ? 
C3B C4B H4B1 110.3 . . ? 
P2 C4B H4B1 110.3 . . ? 
C3B C4B H4B2 110.3 . . ? 
P2 C4B H4B2 110.3 . . ? 
H4B1 C4B H4B2 108.5 . . ? 
P2 C5 H5A 109.5 . . ? 
P2 C5 H5B 109.5 . . ? 
H5A C5 H5B 109.5 . . ? 
P2 C5 H5C 109.5 . . ? 
H5A C5 H5C 109.5 . . ? 
H5B C5 H5C 109.5 . . ? 
P2 C6 H6A 109.5 . . ? 
P2 C6 H6B 109.5 . . ? 
H6A C6 H6B 109.5 . . ? 
P2 C6 H6C 109.5 . . ? 
H6A C6 H6C 109.5 . . ? 
H6B C6 H6C 109.5 . . ? 
N1 C7 S1 130.42(14) . . ? 
N1 C7 H7 114.8 . . ? 
S1 C7 H7 114.8 . . ? 
C13 C8 C9 118.01(17) . . ? 
C13 C8 N1 116.49(16) . . ? 
C9 C8 N1 125.48(16) . . ? 
C10 C9 C8 120.67(19) . . ? 
C10 C9 H9 119.7 . . ? 
C8 C9 H9 119.7 . . ? 
C11 C10 C9 120.5(2) . . ? 
C11 C10 H10 119.7 . . ? 
C9 C10 H10 119.7 . . ? 
C12 C11 C10 119.41(19) . . ? 
C12 C11 H11 120.3 . . ? 
C10 C11 H11 120.3 . . ? 
C11 C12 C13 120.5(2) . . ? 
C11 C12 H12 119.7 . . ? 
C13 C12 H12 119.7 . . ? 
C12 C13 C8 120.85(19) . . ? 
C12 C13 H13 119.6 . . ? 
C8 C13 H13 119.6 . . ? 
 
loop_ 
 _geom_torsion_atom_site_label_1 
 _geom_torsion_atom_site_label_2 
 _geom_torsion_atom_site_label_3 
 _geom_torsion_atom_site_label_4 
 _geom_torsion 
 _geom_torsion_site_symmetry_1 
 _geom_torsion_site_symmetry_2 
 _geom_torsion_site_symmetry_3 
 _geom_torsion_site_symmetry_4 
 _geom_torsion_publ_flag 
P2 Fe1 S1 C7 134.39(8) . . . . ? 
P2 Fe1 S1 C7 -45.61(8) 3_666 . . . ? 
P1 Fe1 S1 C7 -139.11(9) . . . . ? 
P1 Fe1 S1 C7 40.89(9) 3_666 . . . ? 
S1 Fe1 S1 C7 -42(100) 3_666 . . . ? 
P2 Fe1 P1 C2 -112.26(12) . . . . ? 
P2 Fe1 P1 C2 67.74(12) 3_666 . . . ? 
P1 Fe1 P1 C2 47(100) 3_666 . . . ? 
S1 Fe1 P1 C2 162.34(11) . . . . ? 
S1 Fe1 P1 C2 -17.66(11) 3_666 . . . ? 
P2 Fe1 P1 C1 121.41(14) . . . . ? 
P2 Fe1 P1 C1 -58.59(14) 3_666 . . . ? 
P1 Fe1 P1 C1 -79(100) 3_666 . . . ? 
S1 Fe1 P1 C1 36.01(14) . . . . ? 
S1 Fe1 P1 C1 -143.99(14) 3_666 . . . ? 
P2 Fe1 P1 C3A 18.51(13) . . . . ? 
P2 Fe1 P1 C3A -161.49(13) 3_666 . . . ? 
P1 Fe1 P1 C3A 178(100) 3_666 . . . ? 
S1 Fe1 P1 C3A -66.89(14) . . . . ? 
S1 Fe1 P1 C3A 113.11(14) 3_666 . . . ? 
P2 Fe1 P1 C3B -8.67(14) . . . . ? 
P2 Fe1 P1 C3B 171.33(14) 3_666 . . . ? 
P1 Fe1 P1 C3B 151(100) 3_666 . . . ? 
S1 Fe1 P1 C3B -94.06(14) . . . . ? 
S1 Fe1 P1 C3B 85.94(14) 3_666 . . . ? 
P2 Fe1 P2 C6 15(100) 3_666 . . . ? 
P1 Fe1 P2 C6 112.71(11) . . . . ? 
P1 Fe1 P2 C6 -67.29(11) 3_666 . . . ? 
S1 Fe1 P2 C6 -162.57(11) . . . . ? 
S1 Fe1 P2 C6 17.43(11) 3_666 . . . ? 
P2 Fe1 P2 C5 142(100) 3_666 . . . ? 
P1 Fe1 P2 C5 -120.32(13) . . . . ? 
P1 Fe1 P2 C5 59.68(13) 3_666 . . . ? 
S1 Fe1 P2 C5 -35.60(13) . . . . ? 
S1 Fe1 P2 C5 144.40(13) 3_666 . . . ? 
P2 Fe1 P2 C4B -114(100) 3_666 . . . ? 
P1 Fe1 P2 C4B -16.16(15) . . . . ? 
P1 Fe1 P2 C4B 163.84(15) 3_666 . . . ? 
S1 Fe1 P2 C4B 68.57(15) . . . . ? 
S1 Fe1 P2 C4B -111.43(15) 3_666 . . . ? 
P2 Fe1 P2 C4A -90(100) 3_666 . . . ? 
P1 Fe1 P2 C4A 7.52(14) . . . . ? 
P1 Fe1 P2 C4A -172.48(14) 3_666 . . . ? 
S1 Fe1 P2 C4A 92.25(14) . . . . ? 
S1 Fe1 P2 C4A -87.75(14) 3_666 . . . ? 
C2 P1 C3A C4A 89.6(3) . . . . ? 
C1 P1 C3A C4A -169.9(3) . . . . ? 
C3B P1 C3A C4A 45.0(4) . . . . ? 
Fe1 P1 C3A C4A -46.5(3) . . . . ? 
P1 C3A C4A P2 53.3(3) . . . . ? 
C6 P2 C4A C3A -163.0(3) . . . . ? 
C5 P2 C4A C3A 95.5(3) . . . . ? 
C4B P2 C4A C3A 59.6(5) . . . . ? 
Fe1 P2 C4A C3A -38.3(3) . . . . ? 
C2 P1 C3B C4B 162.4(3) . . . . ? 
C1 P1 C3B C4B -96.6(3) . . . . ? 
C3A P1 C3B C4B -58.4(4) . . . . ? 
Fe1 P1 C3B C4B 38.2(3) . . . . ? 
P1 C3B C4B P2 -51.7(3) . . . . ? 
C6 P2 C4B C3B -91.0(3) . . . . ? 
C5 P2 C4B C3B 168.2(3) . . . . ? 
C4A P2 C4B C3B -45.1(4) . . . . ? 
Fe1 P2 C4B C3B 44.2(3) . . . . ? 
C8 N1 C7 S1 -178.02(14) . . . . ? 
Fe1 S1 C7 N1 1.7(2) . . . . ? 
C7 N1 C8 C13 161.65(18) . . . . ? 
C7 N1 C8 C9 -19.9(3) . . . . ? 
C13 C8 C9 C10 -0.7(3) . . . . ? 
N1 C8 C9 C10 -179.18(18) . . . . ? 
C8 C9 C10 C11 0.4(3) . . . . ? 
C9 C10 C11 C12 -0.4(3) . . . . ? 
C10 C11 C12 C13 0.7(4) . . . . ? 
C11 C12 C13 C8 -1.1(3) . . . . ? 
C9 C8 C13 C12 1.0(3) . . . . ? 
N1 C8 C13 C12 179.65(19) . . . . ? 
 
_diffrn_measured_fraction_theta_max    0.947 
_diffrn_reflns_theta_full              28.31 
_diffrn_measured_fraction_theta_full   0.947 
_refine_diff_density_max    0.699 
_refine_diff_density_min   -0.402 
_refine_diff_density_rms    0.057 

#=======================================================================
#  Data block for single structure (one for each study in the paper)
#=======================================================================

data_ldf113 
 
_audit_creation_method            SHELXL-97 
_chemical_name_systematic 
; 
 ? 
; 
_chemical_name_common             ? 
_chemical_melting_point           ? 
_chemical_formula_moiety          ? 
_chemical_formula_sum 
 'C21 H44 Fe N2 P4 S2' 
_chemical_formula_weight          568.43 
 
loop_ 
 _atom_type_symbol 
 _atom_type_description 
 _atom_type_scat_dispersion_real 
 _atom_type_scat_dispersion_imag 
 _atom_type_scat_source 
 'C'  'C'   0.0033   0.0016 
 'International Tables Vol C Tables 4.2.6.8 and 6.1.1.4' 
 'H'  'H'   0.0000   0.0000 
 'International Tables Vol C Tables 4.2.6.8 and 6.1.1.4' 
 'Fe'  'Fe'   0.3463   0.8444 
 'International Tables Vol C Tables 4.2.6.8 and 6.1.1.4' 
 'N'  'N'   0.0061   0.0033 
 'International Tables Vol C Tables 4.2.6.8 and 6.1.1.4' 
 'P'  'P'   0.1023   0.0942 
 'International Tables Vol C Tables 4.2.6.8 and 6.1.1.4' 
 'S'  'S'   0.1246   0.1234 
 'International Tables Vol C Tables 4.2.6.8 and 6.1.1.4' 
 
_symmetry_cell_setting                 triclinic
_symmetry_space_group_name_H-M        'P -1       '
_symmetry_Int_Tables_number            2
 
loop_ 
 _symmetry_equiv_pos_as_xyz 
 'x, y, z' 
 '-x, -y, -z' 
 
_cell_length_a                    10.435(2) 
_cell_length_b                    16.783(4) 
_cell_length_c                    9.226(2) 
_cell_angle_alpha                 104.933(7) 
_cell_angle_beta                  92.245(8) 
_cell_angle_gamma                 98.482(7) 
_cell_volume                      1539.1(6) 
_cell_formula_units_Z             2 
_cell_measurement_temperature     294(2) 
_cell_measurement_reflns_used     929
_cell_measurement_theta_min       2.235
_cell_measurement_theta_max       25.512
 
_exptl_crystal_description        prism
_exptl_crystal_colour             red
_exptl_crystal_size_max           0.492
_exptl_crystal_size_mid           0.152
_exptl_crystal_size_min           0.102
_exptl_crystal_density_meas       ? 
_exptl_crystal_density_diffrn     1.227 
_exptl_crystal_density_method     'not measured' 
_exptl_crystal_F_000              604 
_exptl_absorpt_coefficient_mu     0.845 
_exptl_absorpt_correction_type    Gaussian
_exptl_absorpt_correction_T_min   0.772
_exptl_absorpt_correction_T_max   0.926
_exptl_absorpt_process_details    ?
 
_exptl_special_details 
; 
 Poor quality crystal mounted in a capillary.
; 
 
_diffrn_ambient_temperature       294(2) 
_diffrn_radiation_wavelength      0.71073 
_diffrn_radiation_type            MoK\a 
_diffrn_radiation_source          'sealed tube' 
_diffrn_radiation_monochromator   graphite 
_diffrn_measurement_device_type   'Bruker SMART 1000 CCD'
_diffrn_measurement_method        \w
_diffrn_detector_area_resol_mean  ? 
_diffrn_standards_number          0
_diffrn_standards_interval_count  ? 
_diffrn_standards_interval_time   ? 
_diffrn_standards_decay_%         ?
_diffrn_reflns_number             12535
_diffrn_reflns_av_R_equivalents   0.0335
_diffrn_reflns_av_sigmaI/netI     0.0255 
_diffrn_reflns_limit_h_min        -13 
_diffrn_reflns_limit_h_max        13 
_diffrn_reflns_limit_k_min        -22
_diffrn_reflns_limit_k_max        22 
_diffrn_reflns_limit_l_min        -12 
_diffrn_reflns_limit_l_max        12 
_diffrn_reflns_theta_min          2.17 
_diffrn_reflns_theta_max          28.37 
_reflns_number_total              6847 
_reflns_number_gt                 4949 
_reflns_threshold_expression      >2sigma(I) 

_computing_data_collection        'SMART (Bruker,1995)'
_computing_cell_refinement        'SAINT (Bruker,1995)'
_computing_data_reduction         'SAINT and XPREP'
_computing_structure_solution     'SIR97 (Altomare, et. al. 1997)' 
_computing_structure_refinement   'SHELXL-97 (Sheldrick, 1997)' 
_computing_molecular_graphics     'teXsan for Windows (MSC, 1997)'
_computing_publication_material   ? 
 
_refine_special_details 
; 
 Refinement of F^2^ against ALL reflections.  The weighted R-factor wR and 
 goodness of fit S are based on F^2^, conventional R-factors R are based 
 on F, with F set to zero for negative F^2^. The threshold expression of 
 F^2^ > 2sigma(F^2^) is used only for calculating R-factors(gt) etc. and is 
 not relevant to the choice of reflections for refinement.  R-factors based 
 on F^2^ are statistically about twice as large as those based on F, and R- 
 factors based on ALL data will be even larger. 
; 
 
_refine_ls_structure_factor_coef  Fsqd  
_refine_ls_matrix_type            full 
_refine_ls_weighting_scheme       calc  
_refine_ls_weighting_details 
 'calc w=1/[\s^2^(Fo^2^)+(0.0927P)^2^+0.0000P] where P=(Fo^2^+2Fc^2^)/3' 
_atom_sites_solution_primary      direct 
_atom_sites_solution_secondary    difmap 
_atom_sites_solution_hydrogens    geom 
_refine_ls_hydrogen_treatment     mixed 
_refine_ls_extinction_method      none 
_refine_ls_extinction_coef        ? 
_refine_ls_number_reflns          6827 
_refine_ls_number_parameters      306 
_refine_ls_number_restraints      0 
_refine_ls_R_factor_all           0.0741 
_refine_ls_R_factor_gt            0.0498 
_refine_ls_wR_factor_ref          0.1534 
_refine_ls_wR_factor_gt           0.1413 
_refine_ls_goodness_of_fit_ref    1.019 
_refine_ls_restrained_S_all       1.019 
_refine_ls_shift/su_max           0.006 
_refine_ls_shift/su_mean          0.001 
 
loop_ 
 _atom_site_label 
 _atom_site_type_symbol 
 _atom_site_fract_x 
 _atom_site_fract_y 
 _atom_site_fract_z 
 _atom_site_U_iso_or_equiv 
 _atom_site_adp_type 
 _atom_site_occupancy 
 _atom_site_symmetry_multiplicity 
 _atom_site_calc_flag 
 _atom_site_refinement_flags 
 _atom_site_disorder_assembly 
 _atom_site_disorder_group 
Fe1 Fe 0.77868(4) 0.32852(2) 0.75569(4) 0.04775(14) Uani 1 1 d . . . 
H1FE H 0.828(3) 0.3950(19) 0.891(4) 0.071(9) Uiso 1 1 d . . . 
S1 S 0.71292(8) 0.22590(5) 0.53712(9) 0.0631(2) Uani 1 1 d . . . 
S2 S 0.33456(10) 0.28844(7) 0.35227(15) 0.0945(4) Uani 1 1 d . . . 
P1 P 0.86207(9) 0.23889(5) 0.85315(10) 0.0626(2) Uani 1 1 d . . . 
P2 P 0.97309(8) 0.35543(6) 0.67825(10) 0.0665(2) Uani 1 1 d . . . 
P3 P 0.70987(10) 0.43562(5) 0.70014(10) 0.0673(3) Uani 1 1 d . . . 
P4 P 0.59688(10) 0.31414(6) 0.86545(11) 0.0727(3) Uani 1 1 d . . . 
N1 N 0.5159(3) 0.18451(17) 0.3231(3) 0.0702(8) Uani 1 1 d . . . 
N2 N 0.3468(3) 0.1429(2) 0.1443(4) 0.0975(11) Uani 1 1 d . . . 
C1 C 0.5762(3) 0.23523(18) 0.4478(3) 0.0572(7) Uani 1 1 d . . . 
H1 H 0.5383 0.2816 0.4912 0.069 Uiso 1 1 calc R . . 
C2 C 0.5757(4) 0.1126(3) 0.2355(6) 0.1010(14) Uani 1 1 d . . . 
H2A H 0.5529 0.1019 0.1285 0.121 Uiso 1 1 calc R . . 
H2B H 0.6696 0.1245 0.2536 0.121 Uiso 1 1 calc R . . 
C3 C 0.5247(5) 0.0438(4) 0.2869(8) 0.143(2) Uani 1 1 d . . . 
H3A H 0.5562 0.0528 0.3899 0.215 Uiso 1 1 calc R . . 
H3B H 0.5516 -0.0058 0.2265 0.215 Uiso 1 1 calc R . . 
H3C H 0.4315 0.0371 0.2794 0.215 Uiso 1 1 calc R . . 
C4 C 0.3918(3) 0.2001(2) 0.2626(5) 0.0739(10) Uani 1 1 d . . . 
C5 C 0.2228(4) 0.1498(3) 0.0713(6) 0.1182(18) Uani 1 1 d . . . 
H5A H 0.1696 0.1770 0.1467 0.142 Uiso 1 1 calc R . . 
H5B H 0.2389 0.1837 0.0012 0.142 Uiso 1 1 calc R . . 
C6 C 0.1571(6) 0.0710(4) -0.0050(8) 0.178(3) Uani 1 1 d . . . 
H6A H 0.1983 0.0502 -0.0952 0.267 Uiso 1 1 calc R . . 
H6B H 0.0685 0.0746 -0.0306 0.267 Uiso 1 1 calc R . . 
H6C H 0.1592 0.0337 0.0582 0.267 Uiso 1 1 calc R . . 
C7 C 0.7787(5) 0.1324(2) 0.8236(6) 0.1103(16) Uani 1 1 d . . . 
H7A H 0.8373 0.0992 0.8528 0.165 Uiso 1 1 calc R . . 
H7B H 0.7494 0.1094 0.7192 0.165 Uiso 1 1 calc R . . 
H7C H 0.7054 0.1322 0.8832 0.165 Uiso 1 1 calc R . . 
C8 C 0.9109(5) 0.2669(3) 1.0545(4) 0.1023(15) Uani 1 1 d . . . 
H8A H 0.8349 0.2664 1.1097 0.153 Uiso 1 1 calc R . . 
H8B H 0.9621 0.3218 1.0839 0.153 Uiso 1 1 calc R . . 
H8C H 0.9615 0.2272 1.0756 0.153 Uiso 1 1 calc R . . 
C9 C 1.0160(5) 0.2213(3) 0.7723(6) 0.1070(15) Uani 1 1 d . . . 
H9A H 1.0709 0.2044 0.8423 0.128 Uiso 1 1 calc R . . 
H9B H 0.9993 0.1762 0.6804 0.128 Uiso 1 1 calc R . . 
C10 C 1.0806(5) 0.2920(4) 0.7409(8) 0.133(2) Uani 1 1 d . . . 
H10A H 1.1388 0.2753 0.6633 0.159 Uiso 1 1 calc R . . 
H10B H 1.1333 0.3260 0.8305 0.159 Uiso 1 1 calc R . . 
C11 C 0.9939(4) 0.3385(4) 0.4787(5) 0.1193(18) Uani 1 1 d . . . 
H11A H 0.9310 0.3633 0.4340 0.179 Uiso 1 1 calc R . . 
H11B H 0.9820 0.2796 0.4311 0.179 Uiso 1 1 calc R . . 
H11C H 1.0799 0.3638 0.4655 0.179 Uiso 1 1 calc R . . 
C12 C 1.0740(5) 0.4584(3) 0.7500(6) 0.132(2) Uani 1 1 d . . . 
H12A H 1.1641 0.4527 0.7456 0.198 Uiso 1 1 calc R . . 
H12B H 1.0571 0.4820 0.8524 0.198 Uiso 1 1 calc R . . 
H12C H 1.0537 0.4944 0.6897 0.198 Uiso 1 1 calc R . . 
C13 C 0.6994(4) 0.4496(3) 0.5120(5) 0.0907(12) Uani 1 1 d . . . 
H13A H 0.6654 0.5000 0.5143 0.136 Uiso 1 1 calc R . . 
H13B H 0.6428 0.4028 0.4464 0.136 Uiso 1 1 calc R . . 
H13C H 0.7844 0.4534 0.4755 0.136 Uiso 1 1 calc R . . 
C14 C 0.7791(6) 0.5381(2) 0.8123(7) 0.149(3) Uani 1 1 d . . . 
H14A H 0.8644 0.5534 0.7826 0.223 Uiso 1 1 calc R . . 
H14B H 0.7849 0.5383 0.9165 0.223 Uiso 1 1 calc R . . 
H14C H 0.7250 0.5774 0.7978 0.223 Uiso 1 1 calc R . . 
C15 C 0.5340(5) 0.4329(3) 0.7405(6) 0.1130(17) Uani 1 1 d . . . 
H15A H 0.5144 0.4893 0.7660 0.136 Uiso 1 1 calc R . . 
H15B H 0.4793 0.4008 0.6511 0.136 Uiso 1 1 calc R . . 
C16 C 0.5065(5) 0.3974(3) 0.8583(8) 0.130(2) Uani 1 1 d . . . 
H16A H 0.4143 0.3755 0.8492 0.155 Uiso 1 1 calc R . . 
H16B H 0.5255 0.4407 0.9525 0.155 Uiso 1 1 calc R . . 
C17 C 0.4717(4) 0.2237(3) 0.7934(6) 0.1200(18) Uani 1 1 d . . . 
H17A H 0.4106 0.2207 0.8677 0.180 Uiso 1 1 calc R . . 
H17B H 0.5107 0.1740 0.7707 0.180 Uiso 1 1 calc R . . 
H17C H 0.4275 0.2285 0.7036 0.180 Uiso 1 1 calc R . . 
C18 C 0.6003(6) 0.3230(5) 1.0663(5) 0.149(2) Uani 1 1 d . . . 
H18A H 0.5161 0.3304 1.1005 0.224 Uiso 1 1 calc R . . 
H18B H 0.6634 0.3701 1.1192 0.224 Uiso 1 1 calc R . . 
H18C H 0.6232 0.2730 1.0851 0.224 Uiso 1 1 calc R . . 
C19 C 1.215(2) 0.0494(16) 0.552(3) 0.089(5) Uiso 0.25 1 d P . . 
C20 C 1.090(3) 0.0833(13) 0.416(3) 0.091(6) Uiso 0.25 1 d P . . 
C21 C 1.010(3) 0.0746(14) 0.375(2) 0.090(5) Uiso 0.25 1 d P . . 
C22 C 0.897(3) 0.0244(16) 0.399(2) 0.082(6) Uiso 0.25 1 d P . . 
C23 C 0.9261(15) -0.0207(9) 0.4998(15) 0.048(3) Uiso 0.25 1 d P . . 
C24 C 1.0613(19) -0.0088(12) 0.549(2) 0.057(3) Uiso 0.25 1 d P . . 
C25 C 1.205(2) 0.0738(13) 0.495(3) 0.080(5) Uiso 0.25 1 d P . . 
C26 C 0.956(3) 0.0418(14) 0.405(2) 0.067(5) Uiso 0.25 1 d P . . 
C27 C 1.155(3) 0.0180(15) 0.570(2) 0.083(5) Uiso 0.25 1 d P . . 
C28 C 1.154(3) 0.0825(12) 0.448(2) 0.076(4) Uiso 0.25 1 d P . . 
C29 C 0.852(3) -0.0444(15) 0.490(3) 0.085(5) Uiso 0.25 1 d P . . 
C30 C 1.003(2) -0.0347(13) 0.571(2) 0.071(6) Uiso 0.25 1 d P . . 
 
loop_ 
 _atom_site_aniso_label 
 _atom_site_aniso_U_11 
 _atom_site_aniso_U_22 
 _atom_site_aniso_U_33 
 _atom_site_aniso_U_23 
 _atom_site_aniso_U_13 
 _atom_site_aniso_U_12 
Fe1 0.0552(3) 0.0437(2) 0.0441(2) 0.00859(17) 0.00479(17) 0.01275(17) 
S1 0.0603(5) 0.0629(5) 0.0599(5) -0.0019(4) -0.0098(4) 0.0263(4) 
S2 0.0686(6) 0.0939(7) 0.1302(9) 0.0319(7) 0.0000(6) 0.0412(5) 
P1 0.0809(6) 0.0534(5) 0.0552(5) 0.0156(4) -0.0035(4) 0.0166(4) 
P2 0.0559(5) 0.0825(6) 0.0647(5) 0.0270(5) 0.0053(4) 0.0093(4) 
P3 0.0893(6) 0.0529(5) 0.0624(5) 0.0130(4) -0.0005(4) 0.0261(4) 
P4 0.0727(6) 0.0681(6) 0.0758(6) 0.0113(5) 0.0274(5) 0.0151(4) 
N1 0.0635(16) 0.0648(17) 0.0773(18) 0.0044(14) -0.0194(14) 0.0267(13) 
N2 0.079(2) 0.088(2) 0.116(3) 0.018(2) -0.049(2) 0.0149(18) 
C1 0.0528(17) 0.0543(17) 0.0633(18) 0.0095(15) 0.0008(14) 0.0169(13) 
C2 0.082(3) 0.093(3) 0.114(3) 0.012(3) -0.043(2) 0.010(2) 
C3 0.099(4) 0.129(5) 0.195(6) 0.044(5) -0.022(4) 0.003(3) 
C4 0.0552(19) 0.076(2) 0.096(3) 0.033(2) -0.0091(18) 0.0148(17) 
C5 0.080(3) 0.119(4) 0.152(5) 0.045(3) -0.059(3) 0.006(3) 
C6 0.123(5) 0.150(5) 0.242(8) 0.059(5) -0.114(5) -0.018(4) 
C7 0.157(5) 0.053(2) 0.120(4) 0.030(2) -0.023(3) 0.015(2) 
C8 0.149(4) 0.101(3) 0.062(2) 0.029(2) -0.018(2) 0.030(3) 
C9 0.108(3) 0.115(4) 0.121(4) 0.044(3) 0.015(3) 0.068(3) 
C10 0.077(3) 0.165(5) 0.197(6) 0.100(5) 0.034(3) 0.054(3) 
C11 0.087(3) 0.200(6) 0.067(2) 0.023(3) 0.034(2) 0.028(3) 
C12 0.111(4) 0.138(5) 0.117(4) 0.019(3) 0.021(3) -0.054(3) 
C13 0.117(3) 0.088(3) 0.085(3) 0.047(2) 0.008(2) 0.029(2) 
C14 0.214(7) 0.049(2) 0.165(5) 0.010(3) -0.083(5) 0.022(3) 
C15 0.123(4) 0.126(4) 0.113(4) 0.031(3) 0.030(3) 0.089(3) 
C16 0.107(4) 0.114(4) 0.184(6) 0.040(4) 0.055(4) 0.058(3) 
C17 0.085(3) 0.105(3) 0.156(5) 0.018(3) 0.046(3) -0.009(3) 
C18 0.133(4) 0.229(7) 0.081(3) 0.028(4) 0.055(3) 0.023(4) 
 
_geom_special_details 
; 
 All esds (except the esd in the dihedral angle between two l.s. planes) 
 are estimated using the full covariance matrix.  The cell esds are taken 
 into account individually in the estimation of esds in distances, angles 
 and torsion angles; correlations between esds in cell parameters are only 
 used when they are defined by crystal symmetry.  An approximate (isotropic) 
 treatment of cell esds is used for estimating esds involving l.s. planes. 
; 
 
loop_ 
 _geom_bond_atom_site_label_1 
 _geom_bond_atom_site_label_2 
 _geom_bond_distance 
 _geom_bond_site_symmetry_2 
 _geom_bond_publ_flag 
Fe1 P4 2.1964(10) . ? 
Fe1 P3 2.1990(10) . ? 
Fe1 P2 2.1998(10) . ? 
Fe1 P1 2.2024(10) . ? 
Fe1 S1 2.2927(9) . ? 
Fe1 H1FE 1.46(3) . ? 
S1 C1 1.667(3) . ? 
S2 C4 1.705(4) . ? 
P1 C7 1.816(4) . ? 
P1 C8 1.826(4) . ? 
P1 C9 1.829(5) . ? 
P2 C11 1.816(4) . ? 
P2 C10 1.829(5) . ? 
P2 C12 1.830(5) . ? 
P3 C14 1.791(4) . ? 
P3 C13 1.812(4) . ? 
P3 C15 1.883(5) . ? 
P4 C16 1.810(5) . ? 
P4 C17 1.810(4) . ? 
P4 C18 1.819(5) . ? 
N1 C1 1.314(4) . ? 
N1 C4 1.475(4) . ? 
N1 C2 1.503(5) . ? 
N2 C4 1.273(5) . ? 
N2 C5 1.469(4) . ? 
C1 H1 0.9300 . ? 
C2 C3 1.401(7) . ? 
C2 H2A 0.9700 . ? 
C2 H2B 0.9700 . ? 
C3 H3A 0.9600 . ? 
C3 H3B 0.9600 . ? 
C3 H3C 0.9600 . ? 
C5 C6 1.388(7) . ? 
C5 H5A 0.9700 . ? 
C5 H5B 0.9700 . ? 
C6 H6A 0.9600 . ? 
C6 H6B 0.9600 . ? 
C6 H6C 0.9600 . ? 
C7 H7A 0.9600 . ? 
C7 H7B 0.9600 . ? 
C7 H7C 0.9600 . ? 
C8 H8A 0.9600 . ? 
C8 H8B 0.9600 . ? 
C8 H8C 0.9600 . ? 
C9 C10 1.379(6) . ? 
C9 H9A 0.9700 . ? 
C9 H9B 0.9700 . ? 
C10 H10A 0.9700 . ? 
C10 H10B 0.9700 . ? 
C11 H11A 0.9600 . ? 
C11 H11B 0.9600 . ? 
C11 H11C 0.9600 . ? 
C12 H12A 0.9600 . ? 
C12 H12B 0.9600 . ? 
C12 H12C 0.9600 . ? 
C13 H13A 0.9600 . ? 
C13 H13B 0.9600 . ? 
C13 H13C 0.9600 . ? 
C14 H14A 0.9600 . ? 
C14 H14B 0.9600 . ? 
C14 H14C 0.9600 . ? 
C15 C16 1.388(7) . ? 
C15 H15A 0.9700 . ? 
C15 H15B 0.9700 . ? 
C16 H16A 0.9700 . ? 
C16 H16B 0.9700 . ? 
C17 H17A 0.9600 . ? 
C17 H17B 0.9600 . ? 
C17 H17C 0.9600 . ? 
C18 H18A 0.9600 . ? 
C18 H18B 0.9600 . ? 
C18 H18C 0.9600 . ? 
C19 C25 0.76(3) . ? 
C19 C29 0.77(3) 2_756 ? 
C19 C27 0.80(3) . ? 
C19 C28 1.41(3) . ? 
C19 C23 1.50(3) 2_756 ? 
C19 C22 1.74(4) 2_756 ? 
C19 C24 1.75(3) . ? 
C19 C20 2.02(4) . ? 
C20 C28 0.72(2) . ? 
C20 C21 0.87(3) . ? 
C20 C30 1.20(3) 2_756 ? 
C20 C29 1.39(4) 2_756 ? 
C20 C25 1.44(3) . ? 
C20 C26 1.45(4) . ? 
C20 C23 1.45(3) 2_756 ? 
C20 C24 1.95(3) 2_756 ? 
C21 C26 0.83(3) . ? 
C21 C30 0.93(3) 2_756 ? 
C21 C22 1.40(3) . ? 
C21 C24 1.57(3) 2_756 ? 
C21 C28 1.58(3) . ? 
C21 C23 1.80(3) 2_756 ? 
C22 C26 0.64(3) . ? 
C22 C24 0.75(2) 2_756 ? 
C22 C27 0.95(3) 2_756 ? 
C22 C30 1.04(3) 2_756 ? 
C22 C23 1.39(3) . ? 
C22 C29 1.62(4) . ? 
C22 C19 1.74(4) 2_756 ? 
C23 C24 0.755(17) 2_756 ? 
C23 C29 0.80(2) . ? 
C23 C27 1.06(3) 2_756 ? 
C23 C30 1.11(2) . ? 
C23 C30 1.41(3) 2_756 ? 
C23 C28 1.43(3) 2_756 ? 
C23 C24 1.44(2) . ? 
C23 C20 1.45(3) 2_756 ? 
C23 C19 1.50(3) 2_756 ? 
C23 C25 1.53(2) 2_756 ? 
C23 C26 1.54(3) . ? 
C24 C22 0.75(2) 2_756 ? 
C24 C23 0.755(17) 2_756 ? 
C24 C30 0.76(2) . ? 
C24 C26 0.79(3) 2_756 ? 
C24 C27 1.01(3) . ? 
C24 C29 1.30(4) 2_756 ? 
C24 C21 1.57(3) 2_756 ? 
C24 C30 1.65(3) 2_756 ? 
C24 C24 1.65(4) 2_756 ? 
C24 C20 1.95(3) 2_756 ? 
C25 C28 0.74(3) . ? 
C25 C29 0.76(3) 2_756 ? 
C25 C27 1.36(3) . ? 
C25 C23 1.53(2) 2_756 ? 
C26 C30 0.52(3) 2_756 ? 
C26 C24 0.79(3) 2_756 ? 
C26 C27 1.49(4) 2_756 ? 
C26 C23 1.61(3) 2_756 ? 
C26 C29 2.02(4) . ? 
C27 C29 0.80(3) 2_756 ? 
C27 C22 0.95(3) 2_756 ? 
C27 C23 1.06(3) 2_756 ? 
C27 C26 1.49(4) 2_756 ? 
C27 C30 1.70(3) . ? 
C27 C28 1.75(3) . ? 
C28 C29 0.96(3) 2_756 ? 
C28 C23 1.43(3) 2_756 ? 
C28 C30 1.69(3) 2_756 ? 
C29 C25 0.76(3) 2_756 ? 
C29 C19 0.77(3) 2_756 ? 
C29 C27 0.80(3) 2_756 ? 
C29 C28 0.96(3) 2_756 ? 
C29 C24 1.30(4) 2_756 ? 
C29 C20 1.39(4) 2_756 ? 
C29 C30 1.68(4) . ? 
C30 C26 0.52(3) 2_756 ? 
C30 C21 0.93(3) 2_756 ? 
C30 C22 1.04(3) 2_756 ? 
C30 C20 1.20(3) 2_756 ? 
C30 C23 1.41(3) 2_756 ? 
C30 C24 1.65(3) 2_756 ? 
C30 C28 1.69(3) 2_756 ? 
C30 C30 1.96(5) 2_756 ? 
 
loop_ 
 _geom_angle_atom_site_label_1 
 _geom_angle_atom_site_label_2 
 _geom_angle_atom_site_label_3 
 _geom_angle 
 _geom_angle_site_symmetry_1 
 _geom_angle_site_symmetry_3 
 _geom_angle_publ_flag 
P4 Fe1 P3 85.54(4) . . ? 
P4 Fe1 P2 171.47(4) . . ? 
P3 Fe1 P2 94.24(4) . . ? 
P4 Fe1 P1 93.39(4) . . ? 
P3 Fe1 P1 168.86(4) . . ? 
P2 Fe1 P1 85.18(4) . . ? 
P4 Fe1 S1 97.18(4) . . ? 
P3 Fe1 S1 100.67(4) . . ? 
P2 Fe1 S1 91.24(4) . . ? 
P1 Fe1 S1 90.46(4) . . ? 
P4 Fe1 H1FE 86.3(12) . . ? 
P3 Fe1 H1FE 79.5(12) . . ? 
P2 Fe1 H1FE 85.3(12) . . ? 
P1 Fe1 H1FE 89.4(12) . . ? 
S1 Fe1 H1FE 176.5(12) . . ? 
C1 S1 Fe1 114.83(11) . . ? 
C7 P1 C8 101.1(2) . . ? 
C7 P1 C9 101.3(2) . . ? 
C8 P1 C9 101.5(2) . . ? 
C7 P1 Fe1 121.21(15) . . ? 
C8 P1 Fe1 119.65(15) . . ? 
C9 P1 Fe1 109.02(16) . . ? 
C11 P2 C10 104.4(3) . . ? 
C11 P2 C12 99.6(3) . . ? 
C10 P2 C12 99.0(3) . . ? 
C11 P2 Fe1 120.26(16) . . ? 
C10 P2 Fe1 109.57(17) . . ? 
C12 P2 Fe1 121.00(18) . . ? 
C14 P3 C13 102.6(2) . . ? 
C14 P3 C15 100.9(3) . . ? 
C13 P3 C15 99.5(2) . . ? 
C14 P3 Fe1 117.60(16) . . ? 
C13 P3 Fe1 124.00(14) . . ? 
C15 P3 Fe1 108.59(17) . . ? 
C16 P4 C17 100.6(3) . . ? 
C16 P4 C18 99.3(3) . . ? 
C17 P4 C18 100.9(3) . . ? 
C16 P4 Fe1 110.71(19) . . ? 
C17 P4 Fe1 121.14(16) . . ? 
C18 P4 Fe1 120.52(19) . . ? 
C1 N1 C4 120.3(3) . . ? 
C1 N1 C2 120.6(3) . . ? 
C4 N1 C2 119.0(3) . . ? 
C4 N2 C5 117.2(4) . . ? 
N1 C1 S1 127.4(2) . . ? 
N1 C1 H1 116.3 . . ? 
S1 C1 H1 116.3 . . ? 
C3 C2 N1 105.7(5) . . ? 
C3 C2 H2A 110.6 . . ? 
N1 C2 H2A 110.6 . . ? 
C3 C2 H2B 110.6 . . ? 
N1 C2 H2B 110.6 . . ? 
H2A C2 H2B 108.7 . . ? 
C2 C3 H3A 109.5 . . ? 
C2 C3 H3B 109.5 . . ? 
H3A C3 H3B 109.5 . . ? 
C2 C3 H3C 109.5 . . ? 
H3A C3 H3C 109.5 . . ? 
H3B C3 H3C 109.5 . . ? 
N2 C4 N1 110.9(3) . . ? 
N2 C4 S2 130.7(3) . . ? 
N1 C4 S2 118.3(3) . . ? 
C6 C5 N2 110.2(4) . . ? 
C6 C5 H5A 109.6 . . ? 
N2 C5 H5A 109.6 . . ? 
C6 C5 H5B 109.6 . . ? 
N2 C5 H5B 109.6 . . ? 
H5A C5 H5B 108.1 . . ? 
C5 C6 H6A 109.5 . . ? 
C5 C6 H6B 109.5 . . ? 
H6A C6 H6B 109.5 . . ? 
C5 C6 H6C 109.5 . . ? 
H6A C6 H6C 109.5 . . ? 
H6B C6 H6C 109.5 . . ? 
P1 C7 H7A 109.5 . . ? 
P1 C7 H7B 109.5 . . ? 
H7A C7 H7B 109.5 . . ? 
P1 C7 H7C 109.5 . . ? 
H7A C7 H7C 109.5 . . ? 
H7B C7 H7C 109.5 . . ? 
P1 C8 H8A 109.5 . . ? 
P1 C8 H8B 109.5 . . ? 
H8A C8 H8B 109.5 . . ? 
P1 C8 H8C 109.5 . . ? 
H8A C8 H8C 109.5 . . ? 
H8B C8 H8C 109.5 . . ? 
C10 C9 P1 111.9(3) . . ? 
C10 C9 H9A 109.2 . . ? 
P1 C9 H9A 109.2 . . ? 
C10 C9 H9B 109.2 . . ? 
P1 C9 H9B 109.2 . . ? 
H9A C9 H9B 107.9 . . ? 
C9 C10 P2 114.0(3) . . ? 
C9 C10 H10A 108.8 . . ? 
P2 C10 H10A 108.8 . . ? 
C9 C10 H10B 108.8 . . ? 
P2 C10 H10B 108.8 . . ? 
H10A C10 H10B 107.7 . . ? 
P2 C11 H11A 109.5 . . ? 
P2 C11 H11B 109.5 . . ? 
H11A C11 H11B 109.5 . . ? 
P2 C11 H11C 109.5 . . ? 
H11A C11 H11C 109.5 . . ? 
H11B C11 H11C 109.5 . . ? 
P2 C12 H12A 109.5 . . ? 
P2 C12 H12B 109.5 . . ? 
H12A C12 H12B 109.5 . . ? 
P2 C12 H12C 109.5 . . ? 
H12A C12 H12C 109.5 . . ? 
H12B C12 H12C 109.5 . . ? 
P3 C13 H13A 109.5 . . ? 
P3 C13 H13B 109.5 . . ? 
H13A C13 H13B 109.5 . . ? 
P3 C13 H13C 109.5 . . ? 
H13A C13 H13C 109.5 . . ? 
H13B C13 H13C 109.5 . . ? 
P3 C14 H14A 109.5 . . ? 
P3 C14 H14B 109.5 . . ? 
H14A C14 H14B 109.5 . . ? 
P3 C14 H14C 109.5 . . ? 
H14A C14 H14C 109.5 . . ? 
H14B C14 H14C 109.5 . . ? 
C16 C15 P3 111.3(3) . . ? 
C16 C15 H15A 109.4 . . ? 
P3 C15 H15A 109.4 . . ? 
C16 C15 H15B 109.4 . . ? 
P3 C15 H15B 109.4 . . ? 
H15A C15 H15B 108.0 . . ? 
C15 C16 P4 113.9(4) . . ? 
C15 C16 H16A 108.8 . . ? 
P4 C16 H16A 108.8 . . ? 
C15 C16 H16B 108.8 . . ? 
P4 C16 H16B 108.8 . . ? 
H16A C16 H16B 107.7 . . ? 
P4 C17 H17A 109.5 . . ? 
P4 C17 H17B 109.5 . . ? 
H17A C17 H17B 109.5 . . ? 
P4 C17 H17C 109.5 . . ? 
H17A C17 H17C 109.5 . . ? 
H17B C17 H17C 109.5 . . ? 
P4 C18 H18A 109.5 . . ? 
P4 C18 H18B 109.5 . . ? 
H18A C18 H18B 109.5 . . ? 
P4 C18 H18C 109.5 . . ? 
H18A C18 H18C 109.5 . . ? 
H18B C18 H18C 109.5 . . ? 
C25 C19 C29 59(3) . 2_756 ? 
C25 C19 C27 121(4) . . ? 
C29 C19 C27 61(3) 2_756 . ? 
C25 C19 C28 19(2) . . ? 
C29 C19 C28 40(3) 2_756 . ? 
C27 C19 C28 101(3) . . ? 
C25 C19 C23 78(3) . 2_756 ? 
C29 C19 C23 18(3) 2_756 2_756 ? 
C27 C19 C23 43(2) . 2_756 ? 
C28 C19 C23 58.6(16) . 2_756 ? 
C25 C19 C22 128(3) . 2_756 ? 
C29 C19 C22 69(4) 2_756 2_756 ? 
C27 C19 C22 8(2) . 2_756 ? 
C28 C19 C22 109(2) . 2_756 ? 
C23 C19 C22 50.4(12) 2_756 2_756 ? 
C25 C19 C24 103(3) . . ? 
C29 C19 C24 44(3) 2_756 . ? 
C27 C19 C24 17(2) . . ? 
C28 C19 C24 84.1(19) . . ? 
C23 C19 C24 25.5(7) 2_756 . ? 
C22 C19 C24 25.0(9) 2_756 . ? 
C25 C19 C20 32(2) . . ? 
C29 C19 C20 28(3) 2_756 . ? 
C27 C19 C20 89(3) . . ? 
C28 C19 C20 13.0(12) . . ? 
C23 C19 C20 45.9(12) 2_756 . ? 
C22 C19 C20 96.3(15) 2_756 . ? 
C24 C19 C20 71.3(14) . . ? 
C28 C20 C21 170(4) . . ? 
C28 C20 C30 121(3) . 2_756 ? 
C21 C20 C30 50(2) . 2_756 ? 
C28 C20 C29 41(3) . 2_756 ? 
C21 C20 C29 131(3) . 2_756 ? 
C30 C20 C29 81(2) 2_756 2_756 ? 
C28 C20 C25 10(2) . . ? 
C21 C20 C25 162(3) . . ? 
C30 C20 C25 112(2) 2_756 . ? 
C29 C20 C25 31.1(14) 2_756 . ? 
C28 C20 C26 141(3) . . ? 
C21 C20 C26 30.9(18) . . ? 
C30 C20 C26 19.8(14) 2_756 . ? 
C29 C20 C26 100(2) 2_756 . ? 
C25 C20 C26 131(2) . . ? 
C28 C20 C23 73(3) . 2_756 ? 
C21 C20 C23 98(2) . 2_756 ? 
C30 C20 C23 48.0(14) 2_756 2_756 ? 
C29 C20 C23 32.8(11) 2_756 2_756 ? 
C25 C20 C23 63.8(13) . 2_756 ? 
C26 C20 C23 67.6(14) . 2_756 ? 
C28 C20 C24 120(3) . 2_756 ? 
C21 C20 C24 51(2) . 2_756 ? 
C30 C20 C24 3.6(11) 2_756 2_756 ? 
C29 C20 C24 79.8(16) 2_756 2_756 ? 
C25 C20 C24 110.9(15) . 2_756 ? 
C26 C20 C24 20.6(12) . 2_756 ? 
C23 C20 C24 47.1(10) 2_756 2_756 ? 
C28 C20 C19 26(2) . . ? 
C21 C20 C19 146(3) . . ? 
C30 C20 C19 95.8(19) 2_756 . ? 
C29 C20 C19 15.1(17) 2_756 . ? 
C25 C20 C19 16.3(11) . . ? 
C26 C20 C19 115.3(19) . . ? 
C23 C20 C19 47.8(13) 2_756 . ? 
C24 C20 C19 94.7(14) 2_756 . ? 
C26 C21 C20 117(4) . . ? 
C26 C21 C30 33(2) . 2_756 ? 
C20 C21 C30 84(3) . 2_756 ? 
C26 C21 C22 15(3) . . ? 
C20 C21 C22 131(3) . . ? 
C30 C21 C22 48(2) 2_756 . ? 
C26 C21 C24 14(2) . 2_756 ? 
C20 C21 C24 103(2) . 2_756 ? 
C30 C21 C24 19.5(18) 2_756 2_756 ? 
C22 C21 C24 28.7(10) . 2_756 ? 
C26 C21 C28 113(3) . . ? 
C20 C21 C28 4.7(19) . . ? 
C30 C21 C28 80(2) 2_756 . ? 
C22 C21 C28 127.9(18) . . ? 
C24 C21 C28 99.2(15) 2_756 . ? 
C26 C21 C23 64(3) . 2_756 ? 
C20 C21 C23 53.1(19) . 2_756 ? 
C30 C21 C23 30.7(19) 2_756 2_756 ? 
C22 C21 C23 78.6(15) . 2_756 ? 
C24 C21 C23 49.9(10) 2_756 2_756 ? 
C28 C21 C23 49.3(11) . 2_756 ? 
C26 C22 C24 68(3) . 2_756 ? 
C26 C22 C27 140(5) . 2_756 ? 
C24 C22 C27 72(3) 2_756 2_756 ? 
C26 C22 C30 22(3) . 2_756 ? 
C24 C22 C30 46(2) 2_756 2_756 ? 
C27 C22 C30 118(3) 2_756 2_756 ? 
C26 C22 C23 91(3) . . ? 
C24 C22 C23 22(2) 2_756 . ? 
C27 C22 C23 49.5(19) 2_756 . ? 
C30 C22 C23 69(2) 2_756 . ? 
C26 C22 C21 20(3) . . ? 
C24 C22 C21 88(3) 2_756 . ? 
C27 C22 C21 159(3) 2_756 . ? 
C30 C22 C21 42(2) 2_756 . ? 
C23 C22 C21 110(2) . . ? 
C26 C22 C29 120(4) . . ? 
C24 C22 C29 52(3) 2_756 . ? 
C27 C22 C29 20.0(19) 2_756 . ? 
C30 C22 C29 98(2) 2_756 . ? 
C23 C22 C29 29.7(9) . . ? 
C21 C22 C29 140(2) . . ? 
C26 C22 C19 147(4) . 2_756 ? 
C24 C22 C19 78(3) 2_756 2_756 ? 
C27 C22 C19 7(2) 2_756 2_756 ? 
C30 C22 C19 124(3) 2_756 2_756 ? 
C23 C22 C19 56.0(14) . 2_756 ? 
C21 C22 C19 165.7(19) . 2_756 ? 
C29 C22 C19 26.3(12) . 2_756 ? 
C24 C23 C29 113(3) 2_756 . ? 
C24 C23 C27 65(2) 2_756 2_756 ? 
C29 C23 C27 49(2) . 2_756 ? 
C24 C23 C30 124(3) 2_756 . ? 
C29 C23 C30 123(3) . . ? 
C27 C23 C30 170(3) 2_756 . ? 
C24 C23 C22 22(2) 2_756 . ? 
C29 C23 C22 91(2) . . ? 
C27 C23 C22 42.7(14) 2_756 . ? 
C30 C23 C22 146(3) . . ? 
C24 C23 C30 21(2) 2_756 2_756 ? 
C29 C23 C30 134(3) . 2_756 ? 
C27 C23 C30 86(2) 2_756 2_756 ? 
C30 C23 C30 102.1(19) . 2_756 ? 
C22 C23 C30 43.7(16) . 2_756 ? 
C24 C23 C28 153(3) 2_756 2_756 ? 
C29 C23 C28 40(3) . 2_756 ? 
C27 C23 C28 88(2) 2_756 2_756 ? 
C30 C23 C28 82.9(19) . 2_756 ? 
C22 C23 C28 131(2) . 2_756 ? 
C30 C23 C28 172.5(17) 2_756 2_756 ? 
C24 C23 C24 92(3) 2_756 . ? 
C29 C23 C24 154(3) . . ? 
C27 C23 C24 156(3) 2_756 . ? 
C30 C23 C24 31.3(14) . . ? 
C22 C23 C24 115(2) . . ? 
C30 C23 C24 70.8(16) 2_756 . ? 
C28 C23 C24 114(2) 2_756 . ? 
C24 C23 C20 174(2) 2_756 2_756 ? 
C29 C23 C20 69(3) . 2_756 ? 
C27 C23 C20 117(2) 2_756 2_756 ? 
C30 C23 C20 54.0(18) . 2_756 ? 
C22 C23 C20 160(2) . 2_756 ? 
C30 C23 C20 155(2) 2_756 2_756 ? 
C28 C23 C20 29.0(10) 2_756 2_756 ? 
C24 C23 C20 85.0(18) . 2_756 ? 
C24 C23 C19 96(2) 2_756 2_756 ? 
C29 C23 C19 18(3) . 2_756 ? 
C27 C23 C19 31.0(16) 2_756 2_756 ? 
C30 C23 C19 140(2) . 2_756 ? 
C22 C23 C19 73.6(16) . 2_756 ? 
C30 C23 C19 116.9(19) 2_756 2_756 ? 
C28 C23 C19 57.5(16) 2_756 2_756 ? 
C24 C23 C19 170(2) . 2_756 ? 
C20 C23 C19 86.3(19) 2_756 2_756 ? 
C24 C23 C25 125(2) 2_756 2_756 ? 
C29 C23 C25 11(3) . 2_756 ? 
C27 C23 C25 60(2) 2_756 2_756 ? 
C30 C23 C25 112(2) . 2_756 ? 
C22 C23 C25 102.5(18) . 2_756 ? 
C30 C23 C25 146(2) 2_756 2_756 ? 
C28 C23 C25 28.6(10) 2_756 2_756 ? 
C24 C23 C25 143(2) . 2_756 ? 
C20 C23 C25 57.6(14) 2_756 2_756 ? 
C19 C23 C25 28.9(11) 2_756 2_756 ? 
C24 C23 C26 3(2) 2_756 . ? 
C29 C23 C26 116(3) . . ? 
C27 C23 C26 67.0(19) 2_756 . ? 
C30 C23 C26 121(2) . . ? 
C22 C23 C26 24.4(12) . . ? 
C30 C23 C26 19.5(13) 2_756 . ? 
C28 C23 C26 155(2) 2_756 . ? 
C24 C23 C26 90(2) . . ? 
C20 C23 C26 173.7(18) 2_756 . ? 
C19 C23 C26 98.0(18) 2_756 . ? 
C25 C23 C26 126.9(19) 2_756 . ? 
C22 C24 C23 135(4) 2_756 2_756 ? 
C22 C24 C30 87(4) 2_756 . ? 
C23 C24 C30 137(4) 2_756 . ? 
C22 C24 C26 49(3) 2_756 2_756 ? 
C23 C24 C26 175(4) 2_756 2_756 ? 
C30 C24 C26 39(3) . 2_756 ? 
C22 C24 C27 63(3) 2_756 . ? 
C23 C24 C27 72(3) 2_756 . ? 
C30 C24 C27 149(4) . . ? 
C26 C24 C27 112(4) 2_756 . ? 
C22 C24 C29 101(3) 2_756 2_756 ? 
C23 C24 C29 34.5(18) 2_756 2_756 ? 
C30 C24 C29 170(4) . 2_756 ? 
C26 C24 C29 150(4) 2_756 2_756 ? 
C27 C24 C29 38.0(17) . 2_756 ? 
C22 C24 C23 137(4) 2_756 . ? 
C23 C24 C23 88(3) 2_756 . ? 
C30 C24 C23 49(2) . . ? 
C26 C24 C23 88(3) 2_756 . ? 
C27 C24 C23 159(3) . . ? 
C29 C24 C23 122(3) 2_756 . ? 
C22 C24 C21 63(3) 2_756 2_756 ? 
C23 C24 C21 161(3) 2_756 2_756 ? 
C30 C24 C21 24(2) . 2_756 ? 
C26 C24 C21 15(3) 2_756 2_756 ? 
C27 C24 C21 126(3) . 2_756 ? 
C29 C24 C21 164(3) 2_756 2_756 ? 
C23 C24 C21 73.5(16) . 2_756 ? 
C22 C24 C30 169(4) 2_756 2_756 ? 
C23 C24 C30 34.0(17) 2_756 2_756 ? 
C30 C24 C30 103(3) . 2_756 ? 
C26 C24 C30 142(4) 2_756 2_756 ? 
C27 C24 C30 106(3) . 2_756 ? 
C29 C24 C30 68(2) 2_756 2_756 ? 
C23 C24 C30 53.8(15) . 2_756 ? 
C21 C24 C30 127(2) 2_756 2_756 ? 
C22 C24 C24 164(4) 2_756 2_756 ? 
C23 C24 C24 61(2) 2_756 2_756 ? 
C30 C24 C24 77(3) . 2_756 ? 
C26 C24 C24 115(4) 2_756 2_756 ? 
C27 C24 C24 133(3) . 2_756 ? 
C29 C24 C24 95(3) 2_756 2_756 ? 
C23 C24 C24 27.3(9) . 2_756 ? 
C21 C24 C24 101(2) 2_756 2_756 ? 
C30 C24 C24 26.5(11) 2_756 2_756 ? 
C22 C24 C19 77(3) 2_756 . ? 
C23 C24 C19 58.7(18) 2_756 . ? 
C30 C24 C19 163(3) . . ? 
C26 C24 C19 126(4) 2_756 . ? 
C27 C24 C19 13.8(19) . . ? 
C29 C24 C19 24.2(15) 2_756 . ? 
C23 C24 C19 146(2) . . ? 
C21 C24 C19 140(2) 2_756 . ? 
C30 C24 C19 92.6(18) 2_756 . ? 
C24 C24 C19 119(2) 2_756 . ? 
C22 C24 C20 89(3) 2_756 2_756 ? 
C23 C24 C20 135(3) 2_756 2_756 ? 
C30 C24 C20 5.7(18) . 2_756 ? 
C26 C24 C20 40(3) 2_756 2_756 ? 
C27 C24 C20 152(3) . 2_756 ? 
C29 C24 C20 170(2) 2_756 2_756 ? 
C23 C24 C20 47.9(13) . 2_756 ? 
C21 C24 C20 25.7(9) 2_756 2_756 ? 
C30 C24 C20 101.4(17) 2_756 2_756 ? 
C24 C24 C20 75.0(15) 2_756 2_756 ? 
C19 C24 C20 165.9(19) . 2_756 ? 
C28 C25 C19 141(4) . . ? 
C28 C25 C29 80(3) . 2_756 ? 
C19 C25 C29 61(3) . 2_756 ? 
C28 C25 C27 110(3) . . ? 
C19 C25 C27 31(2) . . ? 
C29 C25 C27 31(3) 2_756 . ? 
C28 C25 C20 10(2) . . ? 
C19 C25 C20 131(3) . . ? 
C29 C25 C20 71(3) 2_756 . ? 
C27 C25 C20 101(2) . . ? 
C28 C25 C23 68(2) . 2_756 ? 
C19 C25 C23 73(3) . 2_756 ? 
C29 C25 C23 12(3) 2_756 2_756 ? 
C27 C25 C23 42.6(14) . 2_756 ? 
C20 C25 C23 58.6(13) . 2_756 ? 
C30 C26 C22 130(7) 2_756 . ? 
C30 C26 C24 67(4) 2_756 2_756 ? 
C22 C26 C24 63(3) . 2_756 ? 
C30 C26 C21 84(6) 2_756 . ? 
C22 C26 C21 146(6) . . ? 
C24 C26 C21 151(5) 2_756 . ? 
C30 C26 C20 52(5) 2_756 . ? 
C22 C26 C20 178(5) . . ? 
C24 C26 C20 119(4) 2_756 . ? 
C21 C26 C20 32(2) . . ? 
C30 C26 C27 106(5) 2_756 2_756 ? 
C22 C26 C27 24(3) . 2_756 ? 
C24 C26 C27 39(2) 2_756 2_756 ? 
C21 C26 C27 169(4) . 2_756 ? 
C20 C26 C27 158(3) . 2_756 ? 
C30 C26 C23 66(5) 2_756 . ? 
C22 C26 C23 65(3) . . ? 
C24 C26 C23 2(2) 2_756 . ? 
C21 C26 C23 149(4) . . ? 
C20 C26 C23 117(2) . . ? 
C27 C26 C23 41.0(12) 2_756 . ? 
C30 C26 C23 7(4) 2_756 2_756 ? 
C22 C26 C23 126(4) . 2_756 ? 
C24 C26 C23 63(3) 2_756 2_756 ? 
C21 C26 C23 89(3) . 2_756 ? 
C20 C26 C23 56.4(15) . 2_756 ? 
C27 C26 C23 101(2) 2_756 2_756 ? 
C23 C26 C23 60.7(16) . 2_756 ? 
C30 C26 C29 86(5) 2_756 . ? 
C22 C26 C29 44(3) . . ? 
C24 C26 C29 19(3) 2_756 . ? 
C21 C26 C29 170(4) . . ? 
C20 C26 C29 138(2) . . ? 
C27 C26 C29 20.0(11) 2_756 . ? 
C23 C26 C29 21.0(9) . . ? 
C23 C26 C29 81.7(19) 2_756 . ? 
C29 C27 C19 57(3) 2_756 . ? 
C29 C27 C22 136(4) 2_756 2_756 ? 
C19 C27 C22 165(4) . 2_756 ? 
C29 C27 C24 91(4) 2_756 . ? 
C19 C27 C24 149(4) . . ? 
C22 C27 C24 45.2(19) 2_756 . ? 
C29 C27 C23 49(2) 2_756 2_756 ? 
C19 C27 C23 106(3) . 2_756 ? 
C22 C27 C23 88(3) 2_756 2_756 ? 
C24 C27 C23 42.7(15) . 2_756 ? 
C29 C27 C25 29(3) 2_756 . ? 
C19 C27 C25 29(2) . . ? 
C22 C27 C25 165(3) 2_756 . ? 
C24 C27 C25 120(3) . . ? 
C23 C27 C25 77(2) 2_756 . ? 
C29 C27 C26 121(4) 2_756 2_756 ? 
C19 C27 C26 177(3) . 2_756 ? 
C22 C27 C26 16.0(19) 2_756 2_756 ? 
C24 C27 C26 29.3(17) . 2_756 ? 
C23 C27 C26 72(2) 2_756 2_756 ? 
C25 C27 C26 149(3) . 2_756 ? 
C29 C27 C30 104(4) 2_756 . ? 
C19 C27 C30 162(4) . . ? 
C22 C27 C30 32.9(19) 2_756 . ? 
C24 C27 C30 13.1(18) . . ? 
C23 C27 C30 55.6(19) 2_756 . ? 
C25 C27 C30 133(3) . . ? 
C26 C27 C30 17.0(10) 2_756 . ? 
C29 C27 C28 6(3) 2_756 . ? 
C19 C27 C28 52(2) . . ? 
C22 C27 C28 142(3) 2_756 . ? 
C24 C27 C28 97(3) . . ? 
C23 C27 C28 54.3(19) 2_756 . ? 
C25 C27 C28 23.2(12) . . ? 
C26 C27 C28 126(2) 2_756 . ? 
C30 C27 C28 110(2) . . ? 
C20 C28 C25 161(5) . . ? 
C20 C28 C29 110(4) . 2_756 ? 
C25 C28 C29 51(2) . 2_756 ? 
C20 C28 C19 141(3) . . ? 
C25 C28 C19 20(2) . . ? 
C29 C28 C19 31(2) 2_756 . ? 
C20 C28 C23 78(3) . 2_756 ? 
C25 C28 C23 83(3) . 2_756 ? 
C29 C28 C23 33(2) 2_756 2_756 ? 
C19 C28 C23 63.9(15) . 2_756 ? 
C20 C28 C21 6(2) . . ? 
C25 C28 C21 157(3) . . ? 
C29 C28 C21 106(3) 2_756 . ? 
C19 C28 C21 137(2) . . ? 
C23 C28 C21 73.2(14) 2_756 . ? 
C20 C28 C30 37(2) . 2_756 ? 
C25 C28 C30 124(3) . 2_756 ? 
C29 C28 C30 73(3) 2_756 2_756 ? 
C19 C28 C30 104.2(18) . 2_756 ? 
C23 C28 C30 40.4(10) 2_756 2_756 ? 
C21 C28 C30 32.8(12) . 2_756 ? 
C20 C28 C27 114(3) . . ? 
C25 C28 C27 46(2) . . ? 
C29 C28 C27 5(2) 2_756 . ? 
C19 C28 C27 26.7(10) . . ? 
C23 C28 C27 37.2(11) 2_756 . ? 
C21 C28 C27 110.2(16) . . ? 
C30 C28 C27 77.5(14) 2_756 . ? 
C25 C29 C19 59(3) 2_756 2_756 ? 
C25 C29 C27 121(5) 2_756 2_756 ? 
C19 C29 C27 61(3) 2_756 2_756 ? 
C25 C29 C23 156(6) 2_756 . ? 
C19 C29 C23 144(5) 2_756 . ? 
C27 C29 C23 83(4) 2_756 . ? 
C25 C29 C28 49(3) 2_756 2_756 ? 
C19 C29 C28 108(5) 2_756 2_756 ? 
C27 C29 C28 169(5) 2_756 2_756 ? 
C23 C29 C28 107(4) . 2_756 ? 
C25 C29 C24 171(5) 2_756 2_756 ? 
C19 C29 C24 112(4) 2_756 2_756 ? 
C27 C29 C24 51(3) 2_756 2_756 ? 
C23 C29 C24 32.2(17) . 2_756 ? 
C28 C29 C24 140(4) 2_756 2_756 ? 
C25 C29 C20 78(4) 2_756 2_756 ? 
C19 C29 C20 137(5) 2_756 2_756 ? 
C27 C29 C20 160(4) 2_756 2_756 ? 
C23 C29 C20 78(3) . 2_756 ? 
C28 C29 C20 29.3(19) 2_756 2_756 ? 
C24 C29 C20 110(3) 2_756 2_756 ? 
C25 C29 C22 144(5) 2_756 . ? 
C19 C29 C22 85(4) 2_756 . ? 
C27 C29 C22 24(3) 2_756 . ? 
C23 C29 C22 59(2) . . ? 
C28 C29 C22 167(4) 2_756 . ? 
C24 C29 C22 27.1(12) 2_756 . ? 
C20 C29 C22 137(3) 2_756 . ? 
C25 C29 C30 123(4) 2_756 . ? 
C19 C29 C30 176(4) 2_756 . ? 
C27 C29 C30 116(4) 2_756 . ? 
C23 C29 C30 33(2) . . ? 
C28 C29 C30 74(3) 2_756 . ? 
C24 C29 C30 65.5(19) 2_756 . ? 
C20 C29 C30 44.9(16) 2_756 . ? 
C22 C29 C30 93(2) . . ? 
C25 C29 C26 160(4) 2_756 . ? 
C19 C29 C26 101(4) 2_756 . ? 
C27 C29 C26 39(3) 2_756 . ? 
C23 C29 C26 43(2) . . ? 
C28 C29 C26 151(4) 2_756 . ? 
C24 C29 C26 11.3(15) 2_756 . ? 
C20 C29 C26 122(3) 2_756 . ? 
C22 C29 C26 15.8(10) . . ? 
C30 C29 C26 76.9(19) . . ? 
C26 C30 C24 74(5) 2_756 . ? 
C26 C30 C21 63(4) 2_756 2_756 ? 
C24 C30 C21 136(4) . 2_756 ? 
C26 C30 C22 28(4) 2_756 2_756 ? 
C24 C30 C22 46(2) . 2_756 ? 
C21 C30 C22 90(3) 2_756 2_756 ? 
C26 C30 C23 170(5) 2_756 . ? 
C24 C30 C23 99(3) . . ? 
C21 C30 C23 124(3) 2_756 . ? 
C22 C30 C23 145(3) 2_756 . ? 
C26 C30 C20 108(6) 2_756 2_756 ? 
C24 C30 C20 171(3) . 2_756 ? 
C21 C30 C20 45.9(19) 2_756 2_756 ? 
C22 C30 C20 136(3) 2_756 2_756 ? 
C23 C30 C20 78(2) . 2_756 ? 
C26 C30 C23 95(5) 2_756 2_756 ? 
C24 C30 C23 21(2) . 2_756 ? 
C21 C30 C23 157(3) 2_756 2_756 ? 
C22 C30 C23 67(2) 2_756 2_756 ? 
C23 C30 C23 77.9(19) . 2_756 ? 
C20 C30 C23 155(3) 2_756 2_756 ? 
C26 C30 C24 150(6) 2_756 2_756 ? 
C24 C30 C24 77(3) . 2_756 ? 
C21 C30 C24 146(3) 2_756 2_756 ? 
C22 C30 C24 123(3) 2_756 2_756 ? 
C23 C30 C24 22.5(10) . 2_756 ? 
C20 C30 C24 100(2) 2_756 2_756 ? 
C23 C30 C24 55.4(15) 2_756 2_756 ? 
C26 C30 C29 161(6) 2_756 . ? 
C24 C30 C29 123(3) . . ? 
C21 C30 C29 100(3) 2_756 . ? 
C22 C30 C29 168(3) 2_756 . ? 
C23 C30 C29 23.6(14) . . ? 
C20 C30 C29 54.3(18) 2_756 . ? 
C23 C30 C29 101(2) 2_756 . ? 
C24 C30 C29 46.0(14) 2_756 . ? 
C26 C30 C28 129(6) 2_756 2_756 ? 
C24 C30 C28 155(4) . 2_756 ? 
C21 C30 C28 67(2) 2_756 2_756 ? 
C22 C30 C28 157(3) 2_756 2_756 ? 
C23 C30 C28 56.7(16) . 2_756 ? 
C20 C30 C28 21.4(14) 2_756 2_756 ? 
C23 C30 C28 134(2) 2_756 2_756 ? 
C24 C30 C28 79.1(15) 2_756 2_756 ? 
C29 C30 C28 33.1(11) . 2_756 ? 
C26 C30 C27 58(5) 2_756 . ? 
C24 C30 C27 18(2) . . ? 
C21 C30 C27 120(3) 2_756 . ? 
C22 C30 C27 29.5(17) 2_756 . ? 
C23 C30 C27 116(2) . . ? 
C20 C30 C27 165(3) 2_756 . ? 
C23 C30 C27 38.5(12) 2_756 . ? 
C24 C30 C27 94(2) 2_756 . ? 
C29 C30 C27 139.7(19) . . ? 
C28 C30 C27 173(2) 2_756 . ? 
C26 C30 C30 128(6) 2_756 2_756 ? 
C24 C30 C30 55(3) . 2_756 ? 
C21 C30 C30 167(3) 2_756 2_756 ? 
C22 C30 C30 101(3) 2_756 2_756 ? 
C23 C30 C30 44.5(13) . 2_756 ? 
C20 C30 C30 122(3) 2_756 2_756 ? 
C23 C30 C30 33.4(10) 2_756 2_756 ? 
C24 C30 C30 22.0(9) 2_756 2_756 ? 
C29 C30 C30 67.9(16) . 2_756 ? 
C28 C30 C30 101.0(18) 2_756 2_756 ? 
C27 C30 C30 71.8(17) . 2_756 ? 
 
loop_ 
 _geom_torsion_atom_site_label_1 
 _geom_torsion_atom_site_label_2 
 _geom_torsion_atom_site_label_3 
 _geom_torsion_atom_site_label_4 
 _geom_torsion 
 _geom_torsion_site_symmetry_1 
 _geom_torsion_site_symmetry_2 
 _geom_torsion_site_symmetry_3 
 _geom_torsion_site_symmetry_4 
 _geom_torsion_publ_flag 
P4 Fe1 S1 C1 54.32(13) . . . . ? 
P3 Fe1 S1 C1 -32.47(13) . . . . ? 
P2 Fe1 S1 C1 -127.01(13) . . . . ? 
P1 Fe1 S1 C1 147.79(13) . . . . ? 
P4 Fe1 P1 C7 56.9(2) . . . . ? 
P3 Fe1 P1 C7 141.0(3) . . . . ? 
P2 Fe1 P1 C7 -131.5(2) . . . . ? 
S1 Fe1 P1 C7 -40.3(2) . . . . ? 
P4 Fe1 P1 C8 -70.22(19) . . . . ? 
P3 Fe1 P1 C8 13.9(3) . . . . ? 
P2 Fe1 P1 C8 101.35(19) . . . . ? 
S1 Fe1 P1 C8 -167.44(19) . . . . ? 
P4 Fe1 P1 C9 173.78(19) . . . . ? 
P3 Fe1 P1 C9 -102.1(3) . . . . ? 
P2 Fe1 P1 C9 -14.65(19) . . . . ? 
S1 Fe1 P1 C9 76.55(19) . . . . ? 
P4 Fe1 P2 C11 -159.4(3) . . . . ? 
P3 Fe1 P2 C11 -71.2(2) . . . . ? 
P1 Fe1 P2 C11 119.9(2) . . . . ? 
S1 Fe1 P2 C11 29.6(2) . . . . ? 
P4 Fe1 P2 C10 79.8(4) . . . . ? 
P3 Fe1 P2 C10 168.0(2) . . . . ? 
P1 Fe1 P2 C10 -0.9(2) . . . . ? 
S1 Fe1 P2 C10 -91.2(2) . . . . ? 
P4 Fe1 P2 C12 -34.3(4) . . . . ? 
P3 Fe1 P2 C12 53.9(2) . . . . ? 
P1 Fe1 P2 C12 -115.0(2) . . . . ? 
S1 Fe1 P2 C12 154.7(2) . . . . ? 
P4 Fe1 P3 C14 101.8(3) . . . . ? 
P2 Fe1 P3 C14 -69.7(3) . . . . ? 
P1 Fe1 P3 C14 16.9(4) . . . . ? 
S1 Fe1 P3 C14 -161.8(3) . . . . ? 
P4 Fe1 P3 C13 -127.72(19) . . . . ? 
P2 Fe1 P3 C13 60.83(19) . . . . ? 
P1 Fe1 P3 C13 147.4(2) . . . . ? 
S1 Fe1 P3 C13 -31.24(19) . . . . ? 
P4 Fe1 P3 C15 -11.87(18) . . . . ? 
P2 Fe1 P3 C15 176.68(18) . . . . ? 
P1 Fe1 P3 C15 -96.7(3) . . . . ? 
S1 Fe1 P3 C15 84.62(18) . . . . ? 
P3 Fe1 P4 C16 -3.6(2) . . . . ? 
P2 Fe1 P4 C16 85.2(4) . . . . ? 
P1 Fe1 P4 C16 165.3(2) . . . . ? 
S1 Fe1 P4 C16 -103.8(2) . . . . ? 
P3 Fe1 P4 C17 113.6(2) . . . . ? 
P2 Fe1 P4 C17 -157.6(3) . . . . ? 
P1 Fe1 P4 C17 -77.5(2) . . . . ? 
S1 Fe1 P4 C17 13.4(2) . . . . ? 
P3 Fe1 P4 C18 -118.6(3) . . . . ? 
P2 Fe1 P4 C18 -29.8(4) . . . . ? 
P1 Fe1 P4 C18 50.2(3) . . . . ? 
S1 Fe1 P4 C18 141.1(3) . . . . ? 
C4 N1 C1 S1 177.2(3) . . . . ? 
C2 N1 C1 S1 -6.2(5) . . . . ? 
Fe1 S1 C1 N1 -178.4(3) . . . . ? 
C1 N1 C2 C3 93.5(4) . . . . ? 
C4 N1 C2 C3 -89.8(4) . . . . ? 
C5 N2 C4 N1 179.8(4) . . . . ? 
C5 N2 C4 S2 -2.4(7) . . . . ? 
C1 N1 C4 N2 -178.0(3) . . . . ? 
C2 N1 C4 N2 5.3(5) . . . . ? 
C1 N1 C4 S2 3.9(5) . . . . ? 
C2 N1 C4 S2 -172.8(3) . . . . ? 
C4 N2 C5 C6 -152.0(6) . . . . ? 
C7 P1 C9 C10 162.0(4) . . . . ? 
C8 P1 C9 C10 -94.1(4) . . . . ? 
Fe1 P1 C9 C10 33.1(5) . . . . ? 
P1 C9 C10 P2 -34.8(6) . . . . ? 
C11 P2 C10 C9 -107.7(5) . . . . ? 
C12 P2 C10 C9 149.9(5) . . . . ? 
Fe1 P2 C10 C9 22.3(5) . . . . ? 
C14 P3 C15 C16 -93.6(5) . . . . ? 
C13 P3 C15 C16 161.5(4) . . . . ? 
Fe1 P3 C15 C16 30.6(5) . . . . ? 
P3 C15 C16 P4 -34.6(6) . . . . ? 
C17 P4 C16 C15 -104.4(5) . . . . ? 
C18 P4 C16 C15 152.6(5) . . . . ? 
Fe1 P4 C16 C15 24.9(6) . . . . ? 
C25 C19 C20 C28 2(6) . . . . ? 
C29 C19 C20 C28 -163(7) 2_756 . . . ? 
C27 C19 C20 C28 -171(5) . . . . ? 
C23 C19 C20 C28 -167(5) 2_756 . . . ? 
C22 C19 C20 C28 -169(5) 2_756 . . . ? 
C24 C19 C20 C28 -169(5) . . . . ? 
C25 C19 C20 C21 169(6) . . . . ? 
C29 C19 C20 C21 4(6) 2_756 . . . ? 
C27 C19 C20 C21 -5(5) . . . . ? 
C28 C19 C20 C21 167(8) . . . . ? 
C23 C19 C20 C21 0(4) 2_756 . . . ? 
C22 C19 C20 C21 -3(5) 2_756 . . . ? 
C24 C19 C20 C21 -3(4) . . . . ? 
C25 C19 C20 C30 170(4) . . . 2_756 ? 
C29 C19 C20 C30 5(4) 2_756 . . 2_756 ? 
C27 C19 C20 C30 -4(2) . . . 2_756 ? 
C28 C19 C20 C30 167(5) . . . 2_756 ? 
C23 C19 C20 C30 0.7(13) 2_756 . . 2_756 ? 
C22 C19 C20 C30 -1.8(18) 2_756 . . 2_756 ? 
C24 C19 C20 C30 -1.9(14) . . . 2_756 ? 
C25 C19 C20 C29 165(6) . . . 2_756 ? 
C27 C19 C20 C29 -9(4) . . . 2_756 ? 
C28 C19 C20 C29 163(7) . . . 2_756 ? 
C23 C19 C20 C29 -4(4) 2_756 . . 2_756 ? 
C22 C19 C20 C29 -7(4) 2_756 . . 2_756 ? 
C24 C19 C20 C29 -7(4) . . . 2_756 ? 
C29 C19 C20 C25 -165(6) 2_756 . . . ? 
C27 C19 C20 C25 -173(5) . . . . ? 
C28 C19 C20 C25 -2(6) . . . . ? 
C23 C19 C20 C25 -169(4) 2_756 . . . ? 
C22 C19 C20 C25 -171(4) 2_756 . . . ? 
C24 C19 C20 C25 -171(4) . . . . ? 
C25 C19 C20 C26 173(4) . . . . ? 
C29 C19 C20 C26 8(4) 2_756 . . . ? 
C27 C19 C20 C26 0(3) . . . . ? 
C28 C19 C20 C26 171(5) . . . . ? 
C23 C19 C20 C26 4.3(14) 2_756 . . . ? 
C22 C19 C20 C26 1.7(17) 2_756 . . . ? 
C24 C19 C20 C26 1.6(15) . . . . ? 
C25 C19 C20 C23 169(4) . . . 2_756 ? 
C29 C19 C20 C23 4(4) 2_756 . . 2_756 ? 
C27 C19 C20 C23 -4.5(19) . . . 2_756 ? 
C28 C19 C20 C23 167(5) . . . 2_756 ? 
C22 C19 C20 C23 -2.5(11) 2_756 . . 2_756 ? 
C24 C19 C20 C23 -2.6(9) . . . 2_756 ? 
C25 C19 C20 C24 173(4) . . . 2_756 ? 
C29 C19 C20 C24 8(4) 2_756 . . 2_756 ? 
C27 C19 C20 C24 0(2) . . . 2_756 ? 
C28 C19 C20 C24 171(5) . . . 2_756 ? 
C23 C19 C20 C24 4.2(9) 2_756 . . 2_756 ? 
C22 C19 C20 C24 1.6(12) 2_756 . . 2_756 ? 
C24 C19 C20 C24 1.5(11) . . . 2_756 ? 
C28 C20 C21 C26 42(24) . . . . ? 
C30 C20 C21 C26 7(3) 2_756 . . . ? 
C29 C20 C21 C26 9(5) 2_756 . . . ? 
C25 C20 C21 C26 18(10) . . . . ? 
C23 C20 C21 C26 8(4) 2_756 . . . ? 
C24 C20 C21 C26 2(2) 2_756 . . . ? 
C19 C20 C21 C26 8(6) . . . . ? 
C28 C20 C21 C30 35(23) . . . 2_756 ? 
C29 C20 C21 C30 2(4) 2_756 . . 2_756 ? 
C25 C20 C21 C30 11(9) . . . 2_756 ? 
C26 C20 C21 C30 -7(3) . . . 2_756 ? 
C23 C20 C21 C30 1(2) 2_756 . . 2_756 ? 
C24 C20 C21 C30 -4.4(14) 2_756 . . 2_756 ? 
C19 C20 C21 C30 1(5) . . . 2_756 ? 
C28 C20 C21 C22 42(24) . . . . ? 
C30 C20 C21 C22 7(2) 2_756 . . . ? 
C29 C20 C21 C22 9(5) 2_756 . . . ? 
C25 C20 C21 C22 18(11) . . . . ? 
C26 C20 C21 C22 0(2) . . . . ? 
C23 C20 C21 C22 8(4) 2_756 . . . ? 
C24 C20 C21 C22 2(2) 2_756 . . . ? 
C19 C20 C21 C22 8(6) . . . . ? 
C28 C20 C21 C24 40(23) . . . 2_756 ? 
C30 C20 C21 C24 4.4(14) 2_756 . . 2_756 ? 
C29 C20 C21 C24 7(4) 2_756 . . 2_756 ? 
C25 C20 C21 C24 15(9) . . . 2_756 ? 
C26 C20 C21 C24 -2(2) . . . 2_756 ? 
C23 C20 C21 C24 5(2) 2_756 . . 2_756 ? 
C19 C20 C21 C24 5(5) . . . 2_756 ? 
C30 C20 C21 C28 -35(23) 2_756 . . . ? 
C29 C20 C21 C28 -33(21) 2_756 . . . ? 
C25 C20 C21 C28 -24(17) . . . . ? 
C26 C20 C21 C28 -42(24) . . . . ? 
C23 C20 C21 C28 -35(22) 2_756 . . . ? 
C24 C20 C21 C28 -40(23) 2_756 . . . ? 
C19 C20 C21 C28 -34(20) . . . . ? 
C28 C20 C21 C23 35(22) . . . 2_756 ? 
C30 C20 C21 C23 -1(2) 2_756 . . 2_756 ? 
C29 C20 C21 C23 1(2) 2_756 . . 2_756 ? 
C25 C20 C21 C23 10(7) . . . 2_756 ? 
C26 C20 C21 C23 -8(4) . . . 2_756 ? 
C24 C20 C21 C23 -5(2) 2_756 . . 2_756 ? 
C19 C20 C21 C23 0(3) . . . 2_756 ? 
C20 C21 C22 C26 -1(8) . . . . ? 
C30 C21 C22 C26 8(7) 2_756 . . . ? 
C24 C21 C22 C26 4(7) 2_756 . . . ? 
C28 C21 C22 C26 3(8) . . . . ? 
C23 C21 C22 C26 6(7) 2_756 . . . ? 
C26 C21 C22 C24 -4(7) . . . 2_756 ? 
C20 C21 C22 C24 -5(4) . . . 2_756 ? 
C30 C21 C22 C24 4(2) 2_756 . . 2_756 ? 
C28 C21 C22 C24 -1(3) . . . 2_756 ? 
C23 C21 C22 C24 1.4(18) 2_756 . . 2_756 ? 
C26 C21 C22 C27 -17(8) . . . 2_756 ? 
C20 C21 C22 C27 -18(8) . . . 2_756 ? 
C30 C21 C22 C27 -9(7) 2_756 . . 2_756 ? 
C24 C21 C22 C27 -13(6) 2_756 . . 2_756 ? 
C28 C21 C22 C27 -14(8) . . . 2_756 ? 
C23 C21 C22 C27 -12(7) 2_756 . . 2_756 ? 
C26 C21 C22 C30 -8(7) . . . 2_756 ? 
C20 C21 C22 C30 -9(3) . . . 2_756 ? 
C24 C21 C22 C30 -4(2) 2_756 . . 2_756 ? 
C28 C21 C22 C30 -5(2) . . . 2_756 ? 
C23 C21 C22 C30 -2.8(16) 2_756 . . 2_756 ? 
C26 C21 C22 C23 -3(7) . . . . ? 
C20 C21 C22 C23 -4(4) . . . . ? 
C30 C21 C22 C23 5(2) 2_756 . . . ? 
C24 C21 C22 C23 1.0(13) 2_756 . . . ? 
C28 C21 C22 C23 0(3) . . . . ? 
C23 C21 C22 C23 2.4(15) 2_756 . . . ? 
C26 C21 C22 C29 -6(7) . . . . ? 
C20 C21 C22 C29 -6(5) . . . . ? 
C30 C21 C22 C29 3(3) 2_756 . . . ? 
C24 C21 C22 C29 -1.5(17) 2_756 . . . ? 
C28 C21 C22 C29 -3(4) . . . . ? 
C23 C21 C22 C29 0(2) 2_756 . . . ? 
C26 C21 C22 C19 -17(8) . . . 2_756 ? 
C20 C21 C22 C19 -18(9) . . . 2_756 ? 
C30 C21 C22 C19 -9(7) 2_756 . . 2_756 ? 
C24 C21 C22 C19 -13(6) 2_756 . . 2_756 ? 
C28 C21 C22 C19 -14(8) . . . 2_756 ? 
C23 C21 C22 C19 -12(7) 2_756 . . 2_756 ? 
C26 C22 C23 C24 -4(4) . . . 2_756 ? 
C27 C22 C23 C24 171(5) 2_756 . . 2_756 ? 
C30 C22 C23 C24 1(4) 2_756 . . 2_756 ? 
C21 C22 C23 C24 -3(4) . . . 2_756 ? 
C29 C22 C23 C24 174(5) . . . 2_756 ? 
C19 C22 C23 C24 173(4) 2_756 . . 2_756 ? 
C26 C22 C23 C29 -178(3) . . . . ? 
C24 C22 C23 C29 -174(5) 2_756 . . . ? 
C27 C22 C23 C29 -3(2) 2_756 . . . ? 
C30 C22 C23 C29 -173(2) 2_756 . . . ? 
C21 C22 C23 C29 -177(2) . . . . ? 
C19 C22 C23 C29 -0.8(19) 2_756 . . . ? 
C26 C22 C23 C27 -174(4) . . . 2_756 ? 
C24 C22 C23 C27 -171(5) 2_756 . . 2_756 ? 
C30 C22 C23 C27 -170(2) 2_756 . . 2_756 ? 
C21 C22 C23 C27 -173(3) . . . 2_756 ? 
C29 C22 C23 C27 3(2) . . . 2_756 ? 
C19 C22 C23 C27 3(2) 2_756 . . 2_756 ? 
C26 C22 C23 C30 -2(4) . . . . ? 
C24 C22 C23 C30 2(4) 2_756 . . . ? 
C27 C22 C23 C30 172(3) 2_756 . . . ? 
C30 C22 C23 C30 3(3) 2_756 . . . ? 
C21 C22 C23 C30 -1(3) . . . . ? 
C29 C22 C23 C30 176(4) . . . . ? 
C19 C22 C23 C30 175(3) 2_756 . . . ? 
C26 C22 C23 C30 -5(3) . . . 2_756 ? 
C24 C22 C23 C30 -1(4) 2_756 . . 2_756 ? 
C27 C22 C23 C30 170(2) 2_756 . . 2_756 ? 
C21 C22 C23 C30 -3.7(14) . . . 2_756 ? 
C29 C22 C23 C30 173(2) . . . 2_756 ? 
C19 C22 C23 C30 172.2(16) 2_756 . . 2_756 ? 
C26 C22 C23 C28 -177(3) . . . 2_756 ? 
C24 C22 C23 C28 -173(4) 2_756 . . 2_756 ? 
C27 C22 C23 C28 -3(2) 2_756 . . 2_756 ? 
C30 C22 C23 C28 -172.4(18) 2_756 . . 2_756 ? 
C21 C22 C23 C28 -176.1(15) . . . 2_756 ? 
C29 C22 C23 C28 0.6(18) . . . 2_756 ? 
C19 C22 C23 C28 -0.2(16) 2_756 . . 2_756 ? 
C26 C22 C23 C24 -4(3) . . . . ? 
C24 C22 C23 C24 0(4) 2_756 . . . ? 
C27 C22 C23 C24 171(2) 2_756 . . . ? 
C30 C22 C23 C24 1.0(16) 2_756 . . . ? 
C21 C22 C23 C24 -3(2) . . . . ? 
C29 C22 C23 C24 174(2) . . . . ? 
C19 C22 C23 C24 173.2(13) 2_756 . . . ? 
C26 C22 C23 C20 -168(4) . . . 2_756 ? 
C24 C22 C23 C20 -164(6) 2_756 . . 2_756 ? 
C27 C22 C23 C20 7(5) 2_756 . . 2_756 ? 
C30 C22 C23 C20 -163(4) 2_756 . . 2_756 ? 
C21 C22 C23 C20 -166(4) . . . 2_756 ? 
C29 C22 C23 C20 10(4) . . . 2_756 ? 
C19 C22 C23 C20 9(4) 2_756 . . 2_756 ? 
C26 C22 C23 C19 -177(3) . . . 2_756 ? 
C24 C22 C23 C19 -173(4) 2_756 . . 2_756 ? 
C27 C22 C23 C19 -3(2) 2_756 . . 2_756 ? 
C30 C22 C23 C19 -172.2(16) 2_756 . . 2_756 ? 
C21 C22 C23 C19 -175.9(17) . . . 2_756 ? 
C29 C22 C23 C19 0.8(19) . . . 2_756 ? 
C26 C22 C23 C25 -178(3) . . . 2_756 ? 
C24 C22 C23 C25 -175(4) 2_756 . . 2_756 ? 
C27 C22 C23 C25 -3.9(19) 2_756 . . 2_756 ? 
C30 C22 C23 C25 -173.6(15) 2_756 . . 2_756 ? 
C21 C22 C23 C25 -177.3(15) . . . 2_756 ? 
C29 C22 C23 C25 -0.6(17) . . . 2_756 ? 
C19 C22 C23 C25 -1.4(13) 2_756 . . 2_756 ? 
C24 C22 C23 C26 4(4) 2_756 . . . ? 
C27 C22 C23 C26 174(4) 2_756 . . . ? 
C30 C22 C23 C26 5(3) 2_756 . . . ? 
C21 C22 C23 C26 1(2) . . . . ? 
C29 C22 C23 C26 178(3) . . . . ? 
C19 C22 C23 C26 177(3) 2_756 . . . ? 
C24 C23 C24 C22 180(4) 2_756 . . 2_756 ? 
C29 C23 C24 C22 -14(6) . . . 2_756 ? 
C27 C23 C24 C22 -164(5) 2_756 . . 2_756 ? 
C30 C23 C24 C22 2(3) . . . 2_756 ? 
C22 C23 C24 C22 180(2) . . . 2_756 ? 
C30 C23 C24 C22 -179(3) 2_756 . . 2_756 ? 
C28 C23 C24 C22 -5(3) 2_756 . . 2_756 ? 
C20 C23 C24 C22 -6(3) 2_756 . . 2_756 ? 
C19 C23 C24 C22 -39(11) 2_756 . . 2_756 ? 
C25 C23 C24 C22 -9(4) 2_756 . . 2_756 ? 
C26 C23 C24 C22 178(3) . . . 2_756 ? 
C24 C23 C24 C23 0.000(4) 2_756 . . 2_756 ? 
C29 C23 C24 C23 166(5) . . . 2_756 ? 
C27 C23 C24 C23 16(4) 2_756 . . 2_756 ? 
C30 C23 C24 C23 -178(3) . . . 2_756 ? 
C22 C23 C24 C23 0.0(17) . . . 2_756 ? 
C30 C23 C24 C23 0.8(14) 2_756 . . 2_756 ? 
C28 C23 C24 C23 175(2) 2_756 . . 2_756 ? 
C20 C23 C24 C23 174(2) 2_756 . . 2_756 ? 
C19 C23 C24 C23 141(10) 2_756 . . 2_756 ? 
C25 C23 C24 C23 171(3) 2_756 . . 2_756 ? 
C26 C23 C24 C23 -1.5(14) . . . 2_756 ? 
C24 C23 C24 C30 178(3) 2_756 . . . ? 
C29 C23 C24 C30 -15(5) . . . . ? 
C27 C23 C24 C30 -166(5) 2_756 . . . ? 
C22 C23 C24 C30 178(2) . . . . ? 
C30 C23 C24 C30 179.0(19) 2_756 . . . ? 
C28 C23 C24 C30 -7(2) 2_756 . . . ? 
C20 C23 C24 C30 -7(2) 2_756 . . . ? 
C19 C23 C24 C30 -41(10) 2_756 . . . ? 
C25 C23 C24 C30 -10(3) 2_756 . . . ? 
C26 C23 C24 C30 177(3) . . . . ? 
C24 C23 C24 C26 -177(3) 2_756 . . 2_756 ? 
C29 C23 C24 C26 -11(5) . . . 2_756 ? 
C27 C23 C24 C26 -161(4) 2_756 . . 2_756 ? 
C30 C23 C24 C26 5(3) . . . 2_756 ? 
C22 C23 C24 C26 -177(2) . . . 2_756 ? 
C30 C23 C24 C26 -176(2) 2_756 . . 2_756 ? 
C28 C23 C24 C26 -2(2) 2_756 . . 2_756 ? 
C20 C23 C24 C26 -2.6(18) 2_756 . . 2_756 ? 
C19 C23 C24 C26 -36(10) 2_756 . . 2_756 ? 
C25 C23 C24 C26 -6(3) 2_756 . . 2_756 ? 
C26 C23 C24 C26 -178.5(13) . . . 2_756 ? 
C24 C23 C24 C27 19(5) 2_756 . . . ? 
C29 C23 C24 C27 -175(6) . . . . ? 
C27 C23 C24 C27 35(7) 2_756 . . . ? 
C30 C23 C24 C27 -159(6) . . . . ? 
C22 C23 C24 C27 19(6) . . . . ? 
C30 C23 C24 C27 20(5) 2_756 . . . ? 
C28 C23 C24 C27 -166(5) 2_756 . . . ? 
C20 C23 C24 C27 -167(5) 2_756 . . . ? 
C19 C23 C24 C27 160(9) 2_756 . . . ? 
C25 C23 C24 C27 -170(5) 2_756 . . . ? 
C26 C23 C24 C27 17(5) . . . . ? 
C24 C23 C24 C29 4.3(17) 2_756 . . 2_756 ? 
C29 C23 C24 C29 171(4) . . . 2_756 ? 
C27 C23 C24 C29 20(4) 2_756 . . 2_756 ? 
C30 C23 C24 C29 -174(3) . . . 2_756 ? 
C22 C23 C24 C29 4(2) . . . 2_756 ? 
C30 C23 C24 C29 5.1(17) 2_756 . . 2_756 ? 
C28 C23 C24 C29 178.9(16) 2_756 . . 2_756 ? 
C20 C23 C24 C29 178.8(16) 2_756 . . 2_756 ? 
C19 C23 C24 C29 145(10) 2_756 . . 2_756 ? 
C25 C23 C24 C29 175.7(19) 2_756 . . 2_756 ? 
C26 C23 C24 C29 2.8(17) . . . 2_756 ? 
C24 C23 C24 C21 -178(2) 2_756 . . 2_756 ? 
C29 C23 C24 C21 -11(5) . . . 2_756 ? 
C27 C23 C24 C21 -162(4) 2_756 . . 2_756 ? 
C30 C23 C24 C21 4(2) . . . 2_756 ? 
C22 C23 C24 C21 -177.7(14) . . . 2_756 ? 
C30 C23 C24 C21 -176.9(12) 2_756 . . 2_756 ? 
C28 C23 C24 C21 -3.1(12) 2_756 . . 2_756 ? 
C20 C23 C24 C21 -3.3(12) 2_756 . . 2_756 ? 
C19 C23 C24 C21 -37(10) 2_756 . . 2_756 ? 
C25 C23 C24 C21 -6.4(19) 2_756 . . 2_756 ? 
C26 C23 C24 C21 -179.2(13) . . . 2_756 ? 
C24 C23 C24 C30 -0.8(14) 2_756 . . 2_756 ? 
C29 C23 C24 C30 166(5) . . . 2_756 ? 
C27 C23 C24 C30 15(4) 2_756 . . 2_756 ? 
C30 C23 C24 C30 -179.0(19) . . . 2_756 ? 
C22 C23 C24 C30 -0.8(12) . . . 2_756 ? 
C28 C23 C24 C30 173.8(15) 2_756 . . 2_756 ? 
C20 C23 C24 C30 173.7(13) 2_756 . . 2_756 ? 
C19 C23 C24 C30 140(10) 2_756 . . 2_756 ? 
C25 C23 C24 C30 171(2) 2_756 . . 2_756 ? 
C26 C23 C24 C30 -2.3(13) . . . 2_756 ? 
C29 C23 C24 C24 166(5) . . . 2_756 ? 
C27 C23 C24 C24 16(4) 2_756 . . 2_756 ? 
C30 C23 C24 C24 -178(3) . . . 2_756 ? 
C22 C23 C24 C24 0.0(17) . . . 2_756 ? 
C30 C23 C24 C24 0.8(14) 2_756 . . 2_756 ? 
C28 C23 C24 C24 175(2) 2_756 . . 2_756 ? 
C20 C23 C24 C24 174(2) 2_756 . . 2_756 ? 
C19 C23 C24 C24 141(10) 2_756 . . 2_756 ? 
C25 C23 C24 C24 171(3) 2_756 . . 2_756 ? 
C26 C23 C24 C24 -1.5(14) . . . 2_756 ? 
C24 C23 C24 C19 10(2) 2_756 . . . ? 
C29 C23 C24 C19 176(5) . . . . ? 
C27 C23 C24 C19 26(5) 2_756 . . . ? 
C30 C23 C24 C19 -168(4) . . . . ? 
C22 C23 C24 C19 10(3) . . . . ? 
C30 C23 C24 C19 11(2) 2_756 . . . ? 
C28 C23 C24 C19 -175(2) 2_756 . . . ? 
C20 C23 C24 C19 -176(2) 2_756 . . . ? 
C19 C23 C24 C19 151(9) 2_756 . . . ? 
C25 C23 C24 C19 -179(2) 2_756 . . . ? 
C26 C23 C24 C19 8(2) . . . . ? 
C24 C23 C24 C20 -174(2) 2_756 . . 2_756 ? 
C29 C23 C24 C20 -8(5) . . . 2_756 ? 
C27 C23 C24 C20 -159(4) 2_756 . . 2_756 ? 
C30 C23 C24 C20 7(2) . . . 2_756 ? 
C22 C23 C24 C20 -174.4(16) . . . 2_756 ? 
C30 C23 C24 C20 -173.7(13) 2_756 . . 2_756 ? 
C28 C23 C24 C20 0.2(13) 2_756 . . 2_756 ? 
C19 C23 C24 C20 -33(10) 2_756 . . 2_756 ? 
C25 C23 C24 C20 -3.1(17) 2_756 . . 2_756 ? 
C26 C23 C24 C20 -176.0(13) . . . 2_756 ? 
C25 C19 C24 C22 175(3) . . . 2_756 ? 
C29 C19 C24 C22 175(4) 2_756 . . 2_756 ? 
C27 C19 C24 C22 -6(6) . . . 2_756 ? 
C28 C19 C24 C22 177(2) . . . 2_756 ? 
C23 C19 C24 C22 175(3) 2_756 . . 2_756 ? 
C20 C19 C24 C22 180(2) . . . 2_756 ? 
C25 C19 C24 C23 0(3) . . . 2_756 ? 
C29 C19 C24 C23 0(3) 2_756 . . 2_756 ? 
C27 C19 C24 C23 178(6) . . . 2_756 ? 
C28 C19 C24 C23 2.0(17) . . . 2_756 ? 
C22 C19 C24 C23 -175(3) 2_756 . . 2_756 ? 
C20 C19 C24 C23 4.4(15) . . . 2_756 ? 
C25 C19 C24 C30 -160(8) . . . . ? 
C29 C19 C24 C30 -160(9) 2_756 . . . ? 
C27 C19 C24 C30 18(10) . . . . ? 
C28 C19 C24 C30 -158(9) . . . . ? 
C23 C19 C24 C30 -160(9) 2_756 . . . ? 
C22 C19 C24 C30 25(8) 2_756 . . . ? 
C20 C19 C24 C30 -156(9) . . . . ? 
C25 C19 C24 C26 177(3) . . . 2_756 ? 
C29 C19 C24 C26 177(4) 2_756 . . 2_756 ? 
C27 C19 C24 C26 -5(6) . . . 2_756 ? 
C28 C19 C24 C26 179(2) . . . 2_756 ? 
C23 C19 C24 C26 177(3) 2_756 . . 2_756 ? 
C22 C19 C24 C26 2(3) 2_756 . . 2_756 ? 
C20 C19 C24 C26 -179(2) . . . 2_756 ? 
C25 C19 C24 C27 -178(7) . . . . ? 
C29 C19 C24 C27 -178(7) 2_756 . . . ? 
C28 C19 C24 C27 -176(6) . . . . ? 
C23 C19 C24 C27 -178(6) 2_756 . . . ? 
C22 C19 C24 C27 6(6) 2_756 . . . ? 
C20 C19 C24 C27 -174(6) . . . . ? 
C25 C19 C24 C29 0(3) . . . 2_756 ? 
C27 C19 C24 C29 178(7) . . . 2_756 ? 
C28 C19 C24 C29 2(2) . . . 2_756 ? 
C23 C19 C24 C29 0(3) 2_756 . . 2_756 ? 
C22 C19 C24 C29 -175(4) 2_756 . . 2_756 ? 
C20 C19 C24 C29 4(3) . . . 2_756 ? 
C25 C19 C24 C23 -12(4) . . . . ? 
C29 C19 C24 C23 -12(4) 2_756 . . . ? 
C27 C19 C24 C23 167(6) . . . . ? 
C28 C19 C24 C23 -10(2) . . . . ? 
C23 C19 C24 C23 -12(2) 2_756 . . . ? 
C22 C19 C24 C23 173(3) 2_756 . . . ? 
C20 C19 C24 C23 -7(2) . . . . ? 
C25 C19 C24 C21 180(2) . . . 2_756 ? 
C29 C19 C24 C21 180(3) 2_756 . . 2_756 ? 
C27 C19 C24 C21 -2(6) . . . 2_756 ? 
C28 C19 C24 C21 -178.1(18) . . . 2_756 ? 
C23 C19 C24 C21 180(3) 2_756 . . 2_756 ? 
C22 C19 C24 C21 5(2) 2_756 . . 2_756 ? 
C20 C19 C24 C21 -176(2) . . . 2_756 ? 
C25 C19 C24 C30 -3(3) . . . 2_756 ? 
C29 C19 C24 C30 -3(3) 2_756 . . 2_756 ? 
C27 C19 C24 C30 175(6) . . . 2_756 ? 
C28 C19 C24 C30 -1.0(12) . . . 2_756 ? 
C23 C19 C24 C30 -3.0(15) 2_756 . . 2_756 ? 
C22 C19 C24 C30 -178(2) 2_756 . . 2_756 ? 
C20 C19 C24 C30 1.4(10) . . . 2_756 ? 
C25 C19 C24 C24 -7(3) . . . 2_756 ? 
C29 C19 C24 C24 -7(3) 2_756 . . 2_756 ? 
C27 C19 C24 C24 172(6) . . . 2_756 ? 
C28 C19 C24 C24 -4.5(18) . . . 2_756 ? 
C23 C19 C24 C24 -6.5(13) 2_756 . . 2_756 ? 
C22 C19 C24 C24 178(3) 2_756 . . 2_756 ? 
C20 C19 C24 C24 -2.1(15) . . . 2_756 ? 
C25 C19 C24 C20 -178(4) . . . 2_756 ? 
C29 C19 C24 C20 -178(5) 2_756 . . 2_756 ? 
C27 C19 C24 C20 0(8) . . . 2_756 ? 
C28 C19 C24 C20 -176(5) . . . 2_756 ? 
C23 C19 C24 C20 -178(6) 2_756 . . 2_756 ? 
C22 C19 C24 C20 7(5) 2_756 . . 2_756 ? 
C20 C19 C24 C20 -174(5) . . . 2_756 ? 
C29 C19 C25 C28 7(6) 2_756 . . . ? 
C27 C19 C25 C28 6(9) . . . . ? 
C23 C19 C25 C28 7(6) 2_756 . . . ? 
C22 C19 C25 C28 9(8) 2_756 . . . ? 
C24 C19 C25 C28 7(7) . . . . ? 
C20 C19 C25 C28 -1(4) . . . . ? 
C27 C19 C25 C29 0(4) . . . 2_756 ? 
C28 C19 C25 C29 -7(6) . . . 2_756 ? 
C23 C19 C25 C29 0(2) 2_756 . . 2_756 ? 
C22 C19 C25 C29 3(3) 2_756 . . 2_756 ? 
C24 C19 C25 C29 0(2) . . . 2_756 ? 
C20 C19 C25 C29 -8(3) . . . 2_756 ? 
C29 C19 C25 C27 0(4) 2_756 . . . ? 
C28 C19 C25 C27 -6(9) . . . . ? 
C23 C19 C25 C27 0(3) 2_756 . . . ? 
C22 C19 C25 C27 3.2(19) 2_756 . . . ? 
C24 C19 C25 C27 1(3) . . . . ? 
C20 C19 C25 C27 -8(6) . . . . ? 
C29 C19 C25 C20 8(3) 2_756 . . . ? 
C27 C19 C25 C20 8(6) . . . . ? 
C28 C19 C25 C20 1(4) . . . . ? 
C23 C19 C25 C20 8(3) 2_756 . . . ? 
C22 C19 C25 C20 11(5) 2_756 . . . ? 
C24 C19 C25 C20 8(4) . . . . ? 
C29 C19 C25 C23 0(2) 2_756 . . 2_756 ? 
C27 C19 C25 C23 0(3) . . . 2_756 ? 
C28 C19 C25 C23 -7(6) . . . 2_756 ? 
C22 C19 C25 C23 3(2) 2_756 . . 2_756 ? 
C24 C19 C25 C23 0.1(12) . . . 2_756 ? 
C20 C19 C25 C23 -8(3) . . . 2_756 ? 
C21 C20 C25 C28 154(18) . . . . ? 
C30 C20 C25 C28 163(13) 2_756 . . . ? 
C29 C20 C25 C28 167(14) 2_756 . . . ? 
C26 C20 C25 C28 166(14) . . . . ? 
C23 C20 C25 C28 165(13) 2_756 . . . ? 
C24 C20 C25 C28 167(13) 2_756 . . . ? 
C19 C20 C25 C28 175(14) . . . . ? 
C28 C20 C25 C19 -175(14) . . . . ? 
C21 C20 C25 C19 -20(10) . . . . ? 
C30 C20 C25 C19 -11(4) 2_756 . . . ? 
C29 C20 C25 C19 -8(3) 2_756 . . . ? 
C26 C20 C25 C19 -8(5) . . . . ? 
C23 C20 C25 C19 -9(3) 2_756 . . . ? 
C24 C20 C25 C19 -7(4) 2_756 . . . ? 
C28 C20 C25 C29 -167(14) . . . 2_756 ? 
C21 C20 C25 C29 -13(9) . . . 2_756 ? 
C30 C20 C25 C29 -4(3) 2_756 . . 2_756 ? 
C26 C20 C25 C29 -1(3) . . . 2_756 ? 
C23 C20 C25 C29 -2(2) 2_756 . . 2_756 ? 
C24 C20 C25 C29 0(2) 2_756 . . 2_756 ? 
C19 C20 C25 C29 8(3) . . . 2_756 ? 
C28 C20 C25 C27 -171(13) . . . . ? 
C21 C20 C25 C27 -16(9) . . . . ? 
C30 C20 C25 C27 -7(2) 2_756 . . . ? 
C29 C20 C25 C27 -4(2) 2_756 . . . ? 
C26 C20 C25 C27 -4(3) . . . . ? 
C23 C20 C25 C27 -5.2(12) 2_756 . . . ? 
C24 C20 C25 C27 -3.4(17) 2_756 . . . ? 
C19 C20 C25 C27 4(3) . . . . ? 
C28 C20 C25 C23 -165(13) . . . 2_756 ? 
C21 C20 C25 C23 -11(8) . . . 2_756 ? 
C30 C20 C25 C23 -2.0(15) 2_756 . . 2_756 ? 
C29 C20 C25 C23 2(2) 2_756 . . 2_756 ? 
C26 C20 C25 C23 0.9(18) . . . 2_756 ? 
C24 C20 C25 C23 1.7(9) 2_756 . . 2_756 ? 
C19 C20 C25 C23 9(3) . . . 2_756 ? 
C24 C22 C26 C30 10(7) 2_756 . . 2_756 ? 
C27 C22 C26 C30 5(11) 2_756 . . 2_756 ? 
C23 C22 C26 C30 12(7) . . . 2_756 ? 
C21 C22 C26 C30 -165(13) . . . 2_756 ? 
C29 C22 C26 C30 10(9) . . . 2_756 ? 
C19 C22 C26 C30 7(11) 2_756 . . 2_756 ? 
C27 C22 C26 C24 -5(5) 2_756 . . 2_756 ? 
C30 C22 C26 C24 -10(7) 2_756 . . 2_756 ? 
C23 C22 C26 C24 1.5(14) . . . 2_756 ? 
C21 C22 C26 C24 -175(7) . . . 2_756 ? 
C29 C22 C26 C24 0(2) . . . 2_756 ? 
C19 C22 C26 C24 -3(5) 2_756 . . 2_756 ? 
C24 C22 C26 C21 175(7) 2_756 . . . ? 
C27 C22 C26 C21 170(4) 2_756 . . . ? 
C30 C22 C26 C21 165(13) 2_756 . . . ? 
C23 C22 C26 C21 177(7) . . . . ? 
C29 C22 C26 C21 176(5) . . . . ? 
C19 C22 C26 C21 172(4) 2_756 . . . ? 
C24 C22 C26 C20 -174(100) 2_756 . . . ? 
C27 C22 C26 C20 -179(100) 2_756 . . . ? 
C30 C22 C26 C20 175(100) 2_756 . . . ? 
C23 C22 C26 C20 -173(100) . . . . ? 
C21 C22 C26 C20 10(100) . . . . ? 
C29 C22 C26 C20 -174(100) . . . . ? 
C19 C22 C26 C20 -177(100) 2_756 . . . ? 
C24 C22 C26 C27 5(5) 2_756 . . 2_756 ? 
C30 C22 C26 C27 -5(11) 2_756 . . 2_756 ? 
C23 C22 C26 C27 7(5) . . . 2_756 ? 
C21 C22 C26 C27 -170(4) . . . 2_756 ? 
C29 C22 C26 C27 5(3) . . . 2_756 ? 
C19 C22 C26 C27 2(2) 2_756 . . 2_756 ? 
C24 C22 C26 C23 -1.5(14) 2_756 . . . ? 
C27 C22 C26 C23 -7(5) 2_756 . . . ? 
C30 C22 C26 C23 -12(7) 2_756 . . . ? 
C21 C22 C26 C23 -177(7) . . . . ? 
C29 C22 C26 C23 -1.3(19) . . . . ? 
C19 C22 C26 C23 -5(5) 2_756 . . . ? 
C24 C22 C26 C23 3(3) 2_756 . . 2_756 ? 
C27 C22 C26 C23 -2(8) 2_756 . . 2_756 ? 
C30 C22 C26 C23 -7(4) 2_756 . . 2_756 ? 
C23 C22 C26 C23 5(4) . . . 2_756 ? 
C21 C22 C26 C23 -172(10) . . . 2_756 ? 
C29 C22 C26 C23 3(5) . . . 2_756 ? 
C19 C22 C26 C23 0(8) 2_756 . . 2_756 ? 
C24 C22 C26 C29 0(2) 2_756 . . . ? 
C27 C22 C26 C29 -5(3) 2_756 . . . ? 
C30 C22 C26 C29 -10(9) 2_756 . . . ? 
C23 C22 C26 C29 1.3(19) . . . . ? 
C21 C22 C26 C29 -176(5) . . . . ? 
C19 C22 C26 C29 -3(3) 2_756 . . . ? 
C20 C21 C26 C30 -12(5) . . . 2_756 ? 
C22 C21 C26 C30 169(10) . . . 2_756 ? 
C24 C21 C26 C30 -3(5) 2_756 . . 2_756 ? 
C28 C21 C26 C30 -9(4) . . . 2_756 ? 
C23 C21 C26 C30 -5(3) 2_756 . . 2_756 ? 
C20 C21 C26 C22 179(6) . . . . ? 
C30 C21 C26 C22 -169(10) 2_756 . . . ? 
C24 C21 C26 C22 -172(13) 2_756 . . . ? 
C28 C21 C26 C22 -177(6) . . . . ? 
C23 C21 C26 C22 -174(8) 2_756 . . . ? 
C20 C21 C26 C24 -9(9) . . . 2_756 ? 
C30 C21 C26 C24 3(5) 2_756 . . 2_756 ? 
C22 C21 C26 C24 172(13) . . . 2_756 ? 
C28 C21 C26 C24 -6(8) . . . 2_756 ? 
C23 C21 C26 C24 -2(6) 2_756 . . 2_756 ? 
C30 C21 C26 C20 12(5) 2_756 . . . ? 
C22 C21 C26 C20 -179(6) . . . . ? 
C24 C21 C26 C20 9(9) 2_756 . . . ? 
C28 C21 C26 C20 3(2) . . . . ? 
C23 C21 C26 C20 7(3) 2_756 . . . ? 
C20 C21 C26 C27 -160(14) . . . 2_756 ? 
C30 C21 C26 C27 -148(17) 2_756 . . 2_756 ? 
C22 C21 C26 C27 21(11) . . . 2_756 ? 
C24 C21 C26 C27 -151(20) 2_756 . . 2_756 ? 
C28 C21 C26 C27 -157(14) . . . 2_756 ? 
C23 C21 C26 C27 -153(16) 2_756 . . 2_756 ? 
C20 C21 C26 C23 -6(7) . . . . ? 
C30 C21 C26 C23 6(3) 2_756 . . . ? 
C22 C21 C26 C23 175(12) . . . . ? 
C24 C21 C26 C23 3(3) 2_756 . . . ? 
C28 C21 C26 C23 -3(6) . . . . ? 
C23 C21 C26 C23 1(4) 2_756 . . . ? 
C20 C21 C26 C23 -7(3) . . . 2_756 ? 
C30 C21 C26 C23 5(3) 2_756 . . 2_756 ? 
C22 C21 C26 C23 174(8) . . . 2_756 ? 
C24 C21 C26 C23 2(6) 2_756 . . 2_756 ? 
C28 C21 C26 C23 -3(2) . . . 2_756 ? 
C20 C21 C26 C29 -18(17) . . . . ? 
C30 C21 C26 C29 -6(13) 2_756 . . . ? 
C22 C21 C26 C29 162(21) . . . . ? 
C24 C21 C26 C29 -9(9) 2_756 . . . ? 
C28 C21 C26 C29 -15(16) . . . . ? 
C23 C21 C26 C29 -11(14) 2_756 . . . ? 
C28 C20 C26 C30 -4(6) . . . 2_756 ? 
C21 C20 C26 C30 165(6) . . . 2_756 ? 
C29 C20 C26 C30 -8(4) 2_756 . . 2_756 ? 
C25 C20 C26 C30 -8(5) . . . 2_756 ? 
C23 C20 C26 C30 -7(4) 2_756 . . 2_756 ? 
C24 C20 C26 C30 -10(3) 2_756 . . 2_756 ? 
C19 C20 C26 C30 -10(4) . . . 2_756 ? 
C28 C20 C26 C22 -180(100) . . . . ? 
C21 C20 C26 C22 -11(100) . . . . ? 
C30 C20 C26 C22 -176(100) 2_756 . . . ? 
C29 C20 C26 C22 176(100) 2_756 . . . ? 
C25 C20 C26 C22 177(100) . . . . ? 
C23 C20 C26 C22 177(100) 2_756 . . . ? 
C24 C20 C26 C22 174(100) 2_756 . . . ? 
C19 C20 C26 C22 174(100) . . . . ? 
C28 C20 C26 C24 6(6) . . . 2_756 ? 
C21 C20 C26 C24 175(5) . . . 2_756 ? 
C30 C20 C26 C24 10(3) 2_756 . . 2_756 ? 
C29 C20 C26 C24 2(3) 2_756 . . 2_756 ? 
C25 C20 C26 C24 2(4) . . . 2_756 ? 
C23 C20 C26 C24 3(2) 2_756 . . 2_756 ? 
C19 C20 C26 C24 0(3) . . . 2_756 ? 
C28 C20 C26 C21 -169(7) . . . . ? 
C30 C20 C26 C21 -165(6) 2_756 . . . ? 
C29 C20 C26 C21 -173(4) 2_756 . . . ? 
C25 C20 C26 C21 -173(4) . . . . ? 
C23 C20 C26 C21 -172(4) 2_756 . . . ? 
C24 C20 C26 C21 -175(5) 2_756 . . . ? 
C19 C20 C26 C21 -175(4) . . . . ? 
C28 C20 C26 C27 1(8) . . . 2_756 ? 
C21 C20 C26 C27 170(6) . . . 2_756 ? 
C30 C20 C26 C27 5(4) 2_756 . . 2_756 ? 
C29 C20 C26 C27 -3(5) 2_756 . . 2_756 ? 
C25 C20 C26 C27 -3(6) . . . 2_756 ? 
C23 C20 C26 C27 -2(4) 2_756 . . 2_756 ? 
C24 C20 C26 C27 -5(3) 2_756 . . 2_756 ? 
C19 C20 C26 C27 -5(5) . . . 2_756 ? 
C28 C20 C26 C23 8(5) . . . . ? 
C21 C20 C26 C23 177(4) . . . . ? 
C30 C20 C26 C23 12(3) 2_756 . . . ? 
C29 C20 C26 C23 3(2) 2_756 . . . ? 
C25 C20 C26 C23 4(3) . . . . ? 
C23 C20 C26 C23 4.7(16) 2_756 . . . ? 
C24 C20 C26 C23 1.5(15) 2_756 . . . ? 
C19 C20 C26 C23 1(2) . . . . ? 
C28 C20 C26 C23 3(4) . . . 2_756 ? 
C21 C20 C26 C23 172(4) . . . 2_756 ? 
C30 C20 C26 C23 7(4) 2_756 . . 2_756 ? 
C29 C20 C26 C23 -1.2(12) 2_756 . . 2_756 ? 
C25 C20 C26 C23 -0.8(18) . . . 2_756 ? 
C24 C20 C26 C23 -3(2) 2_756 . . 2_756 ? 
C19 C20 C26 C23 -3.4(11) . . . 2_756 ? 
C28 C20 C26 C29 6(6) . . . . ? 
C21 C20 C26 C29 175(4) . . . . ? 
C30 C20 C26 C29 11(3) 2_756 . . . ? 
C29 C20 C26 C29 2(3) 2_756 . . . ? 
C25 C20 C26 C29 3(3) . . . . ? 
C23 C20 C26 C29 3(2) 2_756 . . . ? 
C24 C20 C26 C29 0.3(15) 2_756 . . . ? 
C19 C20 C26 C29 0(3) . . . . ? 
C24 C23 C26 C30 -137(42) 2_756 . . 2_756 ? 
C29 C23 C26 C30 -168(4) . . . 2_756 ? 
C27 C23 C26 C30 -166(4) 2_756 . . 2_756 ? 
C30 C23 C26 C30 9(5) . . . 2_756 ? 
C22 C23 C26 C30 -170(6) . . . 2_756 ? 
C28 C23 C26 C30 -165(4) 2_756 . . 2_756 ? 
C24 C23 C26 C30 7(4) . . . 2_756 ? 
C20 C23 C26 C30 -34(17) 2_756 . . 2_756 ? 
C19 C23 C26 C30 -167(4) 2_756 . . 2_756 ? 
C25 C23 C26 C30 -168(3) 2_756 . . 2_756 ? 
C24 C23 C26 C22 33(40) 2_756 . . . ? 
C29 C23 C26 C22 2(4) . . . . ? 
C27 C23 C26 C22 4(3) 2_756 . . . ? 
C30 C23 C26 C22 179(3) . . . . ? 
C30 C23 C26 C22 170(6) 2_756 . . . ? 
C28 C23 C26 C22 5(5) 2_756 . . . ? 
C24 C23 C26 C22 177(3) . . . . ? 
C20 C23 C26 C22 136(16) 2_756 . . . ? 
C19 C23 C26 C22 3(3) 2_756 . . . ? 
C25 C23 C26 C22 2(4) 2_756 . . . ? 
C29 C23 C26 C24 -31(41) . . . 2_756 ? 
C27 C23 C26 C24 -29(41) 2_756 . . 2_756 ? 
C30 C23 C26 C24 145(41) . . . 2_756 ? 
C22 C23 C26 C24 -33(40) . . . 2_756 ? 
C30 C23 C26 C24 137(42) 2_756 . . 2_756 ? 
C28 C23 C26 C24 -28(41) 2_756 . . 2_756 ? 
C24 C23 C26 C24 143(41) . . . 2_756 ? 
C20 C23 C26 C24 103(46) 2_756 . . 2_756 ? 
C19 C23 C26 C24 -30(41) 2_756 . . 2_756 ? 
C25 C23 C26 C24 -31(41) 2_756 . . 2_756 ? 
C24 C23 C26 C21 -143(42) 2_756 . . . ? 
C29 C23 C26 C21 -174(5) . . . . ? 
C27 C23 C26 C21 -173(5) 2_756 . . . ? 
C30 C23 C26 C21 2(6) . . . . ? 
C22 C23 C26 C21 -177(7) . . . . ? 
C30 C23 C26 C21 -7(4) 2_756 . . . ? 
C28 C23 C26 C21 -172(4) 2_756 . . . ? 
C24 C23 C26 C21 0(5) . . . . ? 
C20 C23 C26 C21 -40(18) 2_756 . . . ? 
C19 C23 C26 C21 -174(5) 2_756 . . . ? 
C25 C23 C26 C21 -175(4) 2_756 . . . ? 
C24 C23 C26 C20 -147(41) 2_756 . . . ? 
C29 C23 C26 C20 -178(2) . . . . ? 
C27 C23 C26 C20 -176(2) 2_756 . . . ? 
C30 C23 C26 C20 -2(3) . . . . ? 
C22 C23 C26 C20 180(4) . . . . ? 
C30 C23 C26 C20 -10(3) 2_756 . . . ? 
C28 C23 C26 C20 -175(3) 2_756 . . . ? 
C24 C23 C26 C20 -3.6(16) . . . . ? 
C20 C23 C26 C20 -44(17) 2_756 . . . ? 
C19 C23 C26 C20 -177.3(16) 2_756 . . . ? 
C25 C23 C26 C20 -178.2(14) 2_756 . . . ? 
C24 C23 C26 C27 29(41) 2_756 . . 2_756 ? 
C29 C23 C26 C27 -2(2) . . . 2_756 ? 
C30 C23 C26 C27 175(2) . . . 2_756 ? 
C22 C23 C26 C27 -4(3) . . . 2_756 ? 
C30 C23 C26 C27 166(4) 2_756 . . 2_756 ? 
C28 C23 C26 C27 1(3) 2_756 . . 2_756 ? 
C24 C23 C26 C27 172.5(15) . . . 2_756 ? 
C20 C23 C26 C27 132(16) 2_756 . . 2_756 ? 
C19 C23 C26 C27 -1.2(15) 2_756 . . 2_756 ? 
C25 C23 C26 C27 -2.1(15) 2_756 . . 2_756 ? 
C24 C23 C26 C23 -142(41) 2_756 . . 2_756 ? 
C29 C23 C26 C23 -173(3) . . . 2_756 ? 
C27 C23 C26 C23 -171.7(17) 2_756 . . 2_756 ? 
C30 C23 C26 C23 2.8(17) . . . 2_756 ? 
C22 C23 C26 C23 -176(3) . . . 2_756 ? 
C30 C23 C26 C23 -6(3) 2_756 . . 2_756 ? 
C28 C23 C26 C23 -171(3) 2_756 . . 2_756 ? 
C24 C23 C26 C23 0.8(7) . . . 2_756 ? 
C20 C23 C26 C23 -39(16) 2_756 . . 2_756 ? 
C19 C23 C26 C23 -172.9(14) 2_756 . . 2_756 ? 
C25 C23 C26 C23 -173.8(18) 2_756 . . 2_756 ? 
C24 C23 C26 C29 31(41) 2_756 . . . ? 
C27 C23 C26 C29 2(2) 2_756 . . . ? 
C30 C23 C26 C29 176(3) . . . . ? 
C22 C23 C26 C29 -2(4) . . . . ? 
C30 C23 C26 C29 168(4) 2_756 . . . ? 
C28 C23 C26 C29 3(3) 2_756 . . . ? 
C24 C23 C26 C29 174(2) . . . . ? 
C20 C23 C26 C29 134(17) 2_756 . . . ? 
C19 C23 C26 C29 0(2) 2_756 . . . ? 
C25 C23 C26 C29 -0.4(19) 2_756 . . . ? 
C25 C19 C27 C29 0(4) . . . 2_756 ? 
C28 C19 C27 C29 3(2) . . . 2_756 ? 
C23 C19 C27 C29 0(3) 2_756 . . 2_756 ? 
C22 C19 C27 C29 -161(14) 2_756 . . 2_756 ? 
C24 C19 C27 C29 -1(6) . . . 2_756 ? 
C20 C19 C27 C29 5(2) . . . 2_756 ? 
C25 C19 C27 C22 162(12) . . . 2_756 ? 
C29 C19 C27 C22 161(14) 2_756 . . 2_756 ? 
C28 C19 C27 C22 164(13) . . . 2_756 ? 
C23 C19 C27 C22 161(15) 2_756 . . 2_756 ? 
C24 C19 C27 C22 160(18) . . . 2_756 ? 
C20 C19 C27 C22 166(13) . . . 2_756 ? 
C25 C19 C27 C24 2(8) . . . . ? 
C29 C19 C27 C24 1(6) 2_756 . . . ? 
C28 C19 C27 C24 4(6) . . . . ? 
C23 C19 C27 C24 1(4) 2_756 . . . ? 
C22 C19 C27 C24 -160(18) 2_756 . . . ? 
C20 C19 C27 C24 6(6) . . . . ? 
C25 C19 C27 C23 1(5) . . . 2_756 ? 
C29 C19 C27 C23 0(3) 2_756 . . 2_756 ? 
C28 C19 C27 C23 3(3) . . . 2_756 ? 
C22 C19 C27 C23 -161(15) 2_756 . . 2_756 ? 
C24 C19 C27 C23 -1(4) . . . 2_756 ? 
C20 C19 C27 C23 5(2) . . . 2_756 ? 
C29 C19 C27 C25 0(4) 2_756 . . . ? 
C28 C19 C27 C25 2(3) . . . . ? 
C23 C19 C27 C25 -1(5) 2_756 . . . ? 
C22 C19 C27 C25 -162(12) 2_756 . . . ? 
C24 C19 C27 C25 -2(8) . . . . ? 
C20 C19 C27 C25 4(3) . . . . ? 
C25 C19 C27 C26 50(73) . . . 2_756 ? 
C29 C19 C27 C26 49(71) 2_756 . . 2_756 ? 
C28 C19 C27 C26 52(72) . . . 2_756 ? 
C23 C19 C27 C26 49(70) 2_756 . . 2_756 ? 
C22 C19 C27 C26 -112(74) 2_756 . . 2_756 ? 
C24 C19 C27 C26 48(69) . . . 2_756 ? 
C20 C19 C27 C26 54(71) . . . 2_756 ? 
C25 C19 C27 C30 -6(11) . . . . ? 
C29 C19 C27 C30 -6(8) 2_756 . . . ? 
C28 C19 C27 C30 -4(9) . . . . ? 
C23 C19 C27 C30 -6(7) 2_756 . . . ? 
C22 C19 C27 C30 -167(21) 2_756 . . . ? 
C24 C19 C27 C30 -7(4) . . . . ? 
C20 C19 C27 C30 -2(9) . . . . ? 
C25 C19 C27 C28 -2(3) . . . . ? 
C29 C19 C27 C28 -3(2) 2_756 . . . ? 
C23 C19 C27 C28 -3(3) 2_756 . . . ? 
C22 C19 C27 C28 -164(13) 2_756 . . . ? 
C24 C19 C27 C28 -4(6) . . . . ? 
C20 C19 C27 C28 2.0(12) . . . . ? 
C22 C24 C27 C29 174(3) 2_756 . . 2_756 ? 
C23 C24 C27 C29 0(2) 2_756 . . 2_756 ? 
C30 C24 C27 C29 -168(5) . . . 2_756 ? 
C26 C24 C27 C29 177(3) 2_756 . . 2_756 ? 
C23 C24 C27 C29 -20(6) . . . 2_756 ? 
C21 C24 C27 C29 180(2) 2_756 . . 2_756 ? 
C30 C24 C27 C29 -4(3) 2_756 . . 2_756 ? 
C24 C24 C27 C29 -9(4) 2_756 . . 2_756 ? 
C19 C24 C27 C29 1(5) . . . 2_756 ? 
C20 C24 C27 C29 -179(3) 2_756 . . 2_756 ? 
C22 C24 C27 C19 173(6) 2_756 . . . ? 
C23 C24 C27 C19 -2(6) 2_756 . . . ? 
C30 C24 C27 C19 -170(6) . . . . ? 
C26 C24 C27 C19 176(5) 2_756 . . . ? 
C29 C24 C27 C19 -1(5) 2_756 . . . ? 
C23 C24 C27 C19 -21(9) . . . . ? 
C21 C24 C27 C19 178(5) 2_756 . . . ? 
C30 C24 C27 C19 -5(6) 2_756 . . . ? 
C24 C24 C27 C19 -10(7) 2_756 . . . ? 
C20 C24 C27 C19 -180(4) 2_756 . . . ? 
C23 C24 C27 C22 -175(3) 2_756 . . 2_756 ? 
C30 C24 C27 C22 17(5) . . . 2_756 ? 
C26 C24 C27 C22 3(3) 2_756 . . 2_756 ? 
C29 C24 C27 C22 -174(3) 2_756 . . 2_756 ? 
C23 C24 C27 C22 166(6) . . . 2_756 ? 
C21 C24 C27 C22 6(2) 2_756 . . 2_756 ? 
C30 C24 C27 C22 -178(2) 2_756 . . 2_756 ? 
C24 C24 C27 C22 177(3) 2_756 . . 2_756 ? 
C19 C24 C27 C22 -173(6) . . . 2_756 ? 
C20 C24 C27 C22 7(4) 2_756 . . 2_756 ? 
C22 C24 C27 C23 175(3) 2_756 . . 2_756 ? 
C30 C24 C27 C23 -168(6) . . . 2_756 ? 
C26 C24 C27 C23 177(3) 2_756 . . 2_756 ? 
C29 C24 C27 C23 0(2) 2_756 . . 2_756 ? 
C23 C24 C27 C23 -20(5) . . . 2_756 ? 
C21 C24 C27 C23 -180(3) 2_756 . . 2_756 ? 
C30 C24 C27 C23 -3.4(14) 2_756 . . 2_756 ? 
C24 C24 C27 C23 -8.2(19) 2_756 . . 2_756 ? 
C19 C24 C27 C23 2(6) . . . 2_756 ? 
C20 C24 C27 C23 -178(4) 2_756 . . 2_756 ? 
C22 C24 C27 C25 174(3) 2_756 . . . ? 
C23 C24 C27 C25 -1(2) 2_756 . . . ? 
C30 C24 C27 C25 -169(5) . . . . ? 
C26 C24 C27 C25 177(2) 2_756 . . . ? 
C29 C24 C27 C25 -0.2(18) 2_756 . . . ? 
C23 C24 C27 C25 -20(6) . . . . ? 
C21 C24 C27 C25 179.4(16) 2_756 . . . ? 
C30 C24 C27 C25 -4(2) 2_756 . . . ? 
C24 C24 C27 C25 -9(4) 2_756 . . . ? 
C19 C24 C27 C25 1(5) . . . . ? 
C20 C24 C27 C25 -179(2) 2_756 . . . ? 
C22 C24 C27 C26 -3(3) 2_756 . . 2_756 ? 
C23 C24 C27 C26 -177(3) 2_756 . . 2_756 ? 
C30 C24 C27 C26 15(5) . . . 2_756 ? 
C29 C24 C27 C26 -177(3) 2_756 . . 2_756 ? 
C23 C24 C27 C26 163(6) . . . 2_756 ? 
C21 C24 C27 C26 2.7(19) 2_756 . . 2_756 ? 
C30 C24 C27 C26 179(3) 2_756 . . 2_756 ? 
C24 C24 C27 C26 174(4) 2_756 . . 2_756 ? 
C19 C24 C27 C26 -176(5) . . . 2_756 ? 
C20 C24 C27 C26 4(3) 2_756 . . 2_756 ? 
C22 C24 C27 C30 -17(5) 2_756 . . . ? 
C23 C24 C27 C30 168(6) 2_756 . . . ? 
C26 C24 C27 C30 -15(5) 2_756 . . . ? 
C29 C24 C27 C30 168(5) 2_756 . . . ? 
C23 C24 C27 C30 148(9) . . . . ? 
C21 C24 C27 C30 -12(4) 2_756 . . . ? 
C30 C24 C27 C30 165(6) 2_756 . . . ? 
C24 C24 C27 C30 160(7) 2_756 . . . ? 
C19 C24 C27 C30 170(6) . . . . ? 
C20 C24 C27 C30 -10(4) 2_756 . . . ? 
C22 C24 C27 C28 176(2) 2_756 . . . ? 
C23 C24 C27 C28 1.5(16) 2_756 . . . ? 
C30 C24 C27 C28 -167(5) . . . . ? 
C26 C24 C27 C28 179(2) 2_756 . . . ? 
C29 C24 C27 C28 1.9(17) 2_756 . . . ? 
C23 C24 C27 C28 -18(6) . . . . ? 
C21 C24 C27 C28 -178.5(14) 2_756 . . . ? 
C30 C24 C27 C28 -1.9(16) 2_756 . . . ? 
C24 C24 C27 C28 -7(3) 2_756 . . . ? 
C19 C24 C27 C28 3(5) . . . . ? 
C20 C24 C27 C28 -177(3) 2_756 . . . ? 
C28 C25 C27 C29 5(4) . . . 2_756 ? 
C19 C25 C27 C29 -179(7) . . . 2_756 ? 
C20 C25 C27 C29 7(4) . . . 2_756 ? 
C23 C25 C27 C29 0(4) 2_756 . . 2_756 ? 
C28 C25 C27 C19 -176(6) . . . . ? 
C29 C25 C27 C19 179(7) 2_756 . . . ? 
C20 C25 C27 C19 -174(5) . . . . ? 
C23 C25 C27 C19 179(5) 2_756 . . . ? 
C28 C25 C27 C22 22(10) . . . 2_756 ? 
C19 C25 C27 C22 -163(11) . . . 2_756 ? 
C29 C25 C27 C22 17(9) 2_756 . . 2_756 ? 
C20 C25 C27 C22 23(10) . . . 2_756 ? 
C23 C25 C27 C22 17(9) 2_756 . . 2_756 ? 
C28 C25 C27 C24 5(4) . . . . ? 
C19 C25 C27 C24 -179(5) . . . . ? 
C29 C25 C27 C24 0(4) 2_756 . . . ? 
C20 C25 C27 C24 7(2) . . . . ? 
C23 C25 C27 C24 0.4(15) 2_756 . . . ? 
C28 C25 C27 C23 5(3) . . . 2_756 ? 
C19 C25 C27 C23 -179(5) . . . 2_756 ? 
C29 C25 C27 C23 0(4) 2_756 . . 2_756 ? 
C20 C25 C27 C23 6.5(15) . . . 2_756 ? 
C28 C25 C27 C26 8(5) . . . 2_756 ? 
C19 C25 C27 C26 -176(6) . . . 2_756 ? 
C29 C25 C27 C26 4(4) 2_756 . . 2_756 ? 
C20 C25 C27 C26 10(4) . . . 2_756 ? 
C23 C25 C27 C26 4(3) 2_756 . . 2_756 ? 
C28 C25 C27 C30 2(4) . . . . ? 
C19 C25 C27 C30 178(5) . . . . ? 
C29 C25 C27 C30 -3(4) 2_756 . . . ? 
C20 C25 C27 C30 3(2) . . . . ? 
C23 C25 C27 C30 -3.1(15) 2_756 . . . ? 
C19 C25 C27 C28 176(6) . . . . ? 
C29 C25 C27 C28 -5(4) 2_756 . . . ? 
C20 C25 C27 C28 2(2) . . . . ? 
C23 C25 C27 C28 -5(3) 2_756 . . . ? 
C21 C20 C28 C25 -50(31) . . . . ? 
C30 C20 C28 C25 -18(15) 2_756 . . . ? 
C29 C20 C28 C25 -10(11) 2_756 . . . ? 
C26 C20 C28 C25 -16(16) . . . . ? 
C23 C20 C28 C25 -14(12) 2_756 . . . ? 
C24 C20 C28 C25 -14(14) 2_756 . . . ? 
C19 C20 C28 C25 -3(9) . . . . ? 
C21 C20 C28 C29 -39(24) . . . 2_756 ? 
C30 C20 C28 C29 -8(4) 2_756 . . 2_756 ? 
C25 C20 C28 C29 10(11) . . . 2_756 ? 
C26 C20 C28 C29 -6(6) . . . 2_756 ? 
C23 C20 C28 C29 -3(2) 2_756 . . 2_756 ? 
C24 C20 C28 C29 -4(4) 2_756 . . 2_756 ? 
C19 C20 C28 C29 7(3) . . . 2_756 ? 
C21 C20 C28 C19 -46(25) . . . . ? 
C30 C20 C28 C19 -15(6) 2_756 . . . ? 
C29 C20 C28 C19 -7(3) 2_756 . . . ? 
C25 C20 C28 C19 3(9) . . . . ? 
C26 C20 C28 C19 -13(8) . . . . ? 
C23 C20 C28 C19 -10(4) 2_756 . . . ? 
C24 C20 C28 C19 -11(6) 2_756 . . . ? 
C21 C20 C28 C23 -36(23) . . . 2_756 ? 
C30 C20 C28 C23 -4(3) 2_756 . . 2_756 ? 
C29 C20 C28 C23 3(2) 2_756 . . 2_756 ? 
C25 C20 C28 C23 14(12) . . . 2_756 ? 
C26 C20 C28 C23 -3(4) . . . 2_756 ? 
C24 C20 C28 C23 0(2) 2_756 . . 2_756 ? 
C19 C20 C28 C23 10(4) . . . 2_756 ? 
C30 C20 C28 C21 31(21) 2_756 . . . ? 
C29 C20 C28 C21 39(24) 2_756 . . . ? 
C25 C20 C28 C21 50(31) . . . . ? 
C26 C20 C28 C21 33(20) . . . . ? 
C23 C20 C28 C21 36(23) 2_756 . . . ? 
C24 C20 C28 C21 36(21) 2_756 . . . ? 
C19 C20 C28 C21 46(25) . . . . ? 
C21 C20 C28 C30 -31(21) . . . 2_756 ? 
C29 C20 C28 C30 8(4) 2_756 . . 2_756 ? 
C25 C20 C28 C30 18(15) . . . 2_756 ? 
C26 C20 C28 C30 2(2) . . . 2_756 ? 
C23 C20 C28 C30 4(3) 2_756 . . 2_756 ? 
C24 C20 C28 C30 4.1(13) 2_756 . . 2_756 ? 
C19 C20 C28 C30 15(6) . . . 2_756 ? 
C21 C20 C28 C27 -42(24) . . . . ? 
C30 C20 C28 C27 -10(4) 2_756 . . . ? 
C29 C20 C28 C27 -2.4(15) 2_756 . . . ? 
C25 C20 C28 C27 8(11) . . . . ? 
C26 C20 C28 C27 -9(6) . . . . ? 
C23 C20 C28 C27 -5.8(18) 2_756 . . . ? 
C24 C20 C28 C27 -6(4) 2_756 . . . ? 
C19 C20 C28 C27 4(3) . . . . ? 
C19 C25 C28 C20 7(17) . . . . ? 
C29 C25 C28 C20 12(13) 2_756 . . . ? 
C27 C25 C28 C20 10(14) . . . . ? 
C23 C25 C28 C20 13(12) 2_756 . . . ? 
C19 C25 C28 C29 -6(5) . . . 2_756 ? 
C27 C25 C28 C29 -3(2) . . . 2_756 ? 
C20 C25 C28 C29 -12(13) . . . 2_756 ? 
C23 C25 C28 C29 1(2) 2_756 . . 2_756 ? 
C29 C25 C28 C19 6(5) 2_756 . . . ? 
C27 C25 C28 C19 3(5) . . . . ? 
C20 C25 C28 C19 -7(17) . . . . ? 
C23 C25 C28 C19 7(6) 2_756 . . . ? 
C19 C25 C28 C23 -7(6) . . . 2_756 ? 
C29 C25 C28 C23 -1(2) 2_756 . . 2_756 ? 
C27 C25 C28 C23 -4(2) . . . 2_756 ? 
C20 C25 C28 C23 -13(12) . . . 2_756 ? 
C19 C25 C28 C21 -4(12) . . . . ? 
C29 C25 C28 C21 2(8) 2_756 . . . ? 
C27 C25 C28 C21 -1(8) . . . . ? 
C20 C25 C28 C21 -11(8) . . . . ? 
C23 C25 C28 C21 3(6) 2_756 . . . ? 
C19 C25 C28 C30 -7(8) . . . 2_756 ? 
C29 C25 C28 C30 -1(3) 2_756 . . 2_756 ? 
C27 C25 C28 C30 -3(4) . . . 2_756 ? 
C20 C25 C28 C30 -13(11) . . . 2_756 ? 
C23 C25 C28 C30 0(2) 2_756 . . 2_756 ? 
C19 C25 C28 C27 -3(5) . . . . ? 
C29 C25 C28 C27 3(2) 2_756 . . . ? 
C20 C25 C28 C27 -10(14) . . . . ? 
C23 C25 C28 C27 4(2) 2_756 . . . ? 
C25 C19 C28 C20 -177(9) . . . . ? 
C29 C19 C28 C20 12(5) 2_756 . . . ? 
C27 C19 C28 C20 9(5) . . . . ? 
C23 C19 C28 C20 11(4) 2_756 . . . ? 
C22 C19 C28 C20 11(5) 2_756 . . . ? 
C24 C19 C28 C20 10(5) . . . . ? 
C29 C19 C28 C25 -171(8) 2_756 . . . ? 
C27 C19 C28 C25 -174(7) . . . . ? 
C23 C19 C28 C25 -172(7) 2_756 . . . ? 
C22 C19 C28 C25 -172(7) 2_756 . . . ? 
C24 C19 C28 C25 -173(7) . . . . ? 
C20 C19 C28 C25 177(9) . . . . ? 
C25 C19 C28 C29 171(8) . . . 2_756 ? 
C27 C19 C28 C29 -3(3) . . . 2_756 ? 
C23 C19 C28 C29 -1(3) 2_756 . . 2_756 ? 
C22 C19 C28 C29 -1(3) 2_756 . . 2_756 ? 
C24 C19 C28 C29 -2(3) . . . 2_756 ? 
C20 C19 C28 C29 -12(5) . . . 2_756 ? 
C25 C19 C28 C23 172(7) . . . 2_756 ? 
C29 C19 C28 C23 1(3) 2_756 . . 2_756 ? 
C27 C19 C28 C23 -2(2) . . . 2_756 ? 
C22 C19 C28 C23 0.2(12) 2_756 . . 2_756 ? 
C24 C19 C28 C23 -1.0(8) . . . 2_756 ? 
C20 C19 C28 C23 -11(4) . . . 2_756 ? 
C25 C19 C28 C21 178(7) . . . . ? 
C29 C19 C28 C21 6(4) 2_756 . . . ? 
C27 C19 C28 C21 3(4) . . . . ? 
C23 C19 C28 C21 5(2) 2_756 . . . ? 
C22 C19 C28 C21 5(3) 2_756 . . . ? 
C24 C19 C28 C21 4(2) . . . . ? 
C20 C19 C28 C21 -6(4) . . . . ? 
C25 C19 C28 C30 174(7) . . . 2_756 ? 
C29 C19 C28 C30 3(3) 2_756 . . 2_756 ? 
C27 C19 C28 C30 0(3) . . . 2_756 ? 
C23 C19 C28 C30 2.0(11) 2_756 . . 2_756 ? 
C22 C19 C28 C30 2.2(18) 2_756 . . 2_756 ? 
C24 C19 C28 C30 1.0(12) . . . 2_756 ? 
C20 C19 C28 C30 -9(4) . . . 2_756 ? 
C25 C19 C28 C27 174(7) . . . . ? 
C29 C19 C28 C27 3(3) 2_756 . . . ? 
C23 C19 C28 C27 2(2) 2_756 . . . ? 
C22 C19 C28 C27 2.3(18) 2_756 . . . ? 
C24 C19 C28 C27 1.2(19) . . . . ? 
C20 C19 C28 C27 -9(5) . . . . ? 
C26 C21 C28 C20 -139(24) . . . . ? 
C30 C21 C28 C20 -144(23) 2_756 . . . ? 
C22 C21 C28 C20 -140(23) . . . . ? 
C24 C21 C28 C20 -141(23) 2_756 . . . ? 
C23 C21 C28 C20 -143(23) 2_756 . . . ? 
C26 C21 C28 C25 1(8) . . . . ? 
C20 C21 C28 C25 141(26) . . . . ? 
C30 C21 C28 C25 -4(7) 2_756 . . . ? 
C22 C21 C28 C25 0(8) . . . . ? 
C24 C21 C28 C25 0(7) 2_756 . . . ? 
C23 C21 C28 C25 -3(7) 2_756 . . . ? 
C26 C21 C28 C29 3(3) . . . 2_756 ? 
C20 C21 C28 C29 142(24) . . . 2_756 ? 
C30 C21 C28 C29 -2(2) 2_756 . . 2_756 ? 
C22 C21 C28 C29 2(3) . . . 2_756 ? 
C24 C21 C28 C29 1(2) 2_756 . . 2_756 ? 
C23 C21 C28 C29 -1.4(16) 2_756 . . 2_756 ? 
C26 C21 C28 C19 -1(4) . . . . ? 
C20 C21 C28 C19 138(23) . . . . ? 
C30 C21 C28 C19 -6(3) 2_756 . . . ? 
C22 C21 C28 C19 -2(3) . . . . ? 
C24 C21 C28 C19 -2(3) 2_756 . . . ? 
C23 C21 C28 C19 -4.9(19) 2_756 . . . ? 
C26 C21 C28 C23 4(2) . . . 2_756 ? 
C20 C21 C28 C23 143(23) . . . 2_756 ? 
C30 C21 C28 C23 -0.8(16) 2_756 . . 2_756 ? 
C22 C21 C28 C23 3.1(19) . . . 2_756 ? 
C24 C21 C28 C23 2.6(10) 2_756 . . 2_756 ? 
C26 C21 C28 C30 5(2) . . . 2_756 ? 
C20 C21 C28 C30 144(23) . . . 2_756 ? 
C22 C21 C28 C30 3.9(15) . . . 2_756 ? 
C24 C21 C28 C30 3.4(14) 2_756 . . 2_756 ? 
C23 C21 C28 C30 0.8(16) 2_756 . . 2_756 ? 
C26 C21 C28 C27 1(3) . . . . ? 
C20 C21 C28 C27 140(23) . . . . ? 
C30 C21 C28 C27 -4.3(19) 2_756 . . . ? 
C22 C21 C28 C27 0(2) . . . . ? 
C24 C21 C28 C27 -0.9(16) 2_756 . . . ? 
C23 C21 C28 C27 -3.4(10) 2_756 . . . ? 
C29 C27 C28 C20 27(19) 2_756 . . . ? 
C19 C27 C28 C20 -174(4) . . . . ? 
C22 C27 C28 C20 13(5) 2_756 . . . ? 
C24 C27 C28 C20 8(3) . . . . ? 
C23 C27 C28 C20 9(3) 2_756 . . . ? 
C25 C27 C28 C20 -176(5) . . . . ? 
C26 C27 C28 C20 9(4) 2_756 . . . ? 
C30 C27 C28 C20 5(3) . . . . ? 
C29 C27 C28 C25 -156(20) 2_756 . . . ? 
C19 C27 C28 C25 3(3) . . . . ? 
C22 C27 C28 C25 -171(4) 2_756 . . . ? 
C24 C27 C28 C25 -175(3) . . . . ? 
C23 C27 C28 C25 -174(3) 2_756 . . . ? 
C26 C27 C28 C25 -175(3) 2_756 . . . ? 
C30 C27 C28 C25 -179(3) . . . . ? 
C19 C27 C28 C29 159(20) . . . 2_756 ? 
C22 C27 C28 C29 -14(18) 2_756 . . 2_756 ? 
C24 C27 C28 C29 -19(19) . . . 2_756 ? 
C23 C27 C28 C29 -18(19) 2_756 . . 2_756 ? 
C25 C27 C28 C29 156(20) . . . 2_756 ? 
C26 C27 C28 C29 -18(19) 2_756 . . 2_756 ? 
C30 C27 C28 C29 -22(19) . . . 2_756 ? 
C29 C27 C28 C19 -159(20) 2_756 . . . ? 
C22 C27 C28 C19 -173(5) 2_756 . . . ? 
C24 C27 C28 C19 -178(3) . . . . ? 
C23 C27 C28 C19 -177(3) 2_756 . . . ? 
C25 C27 C28 C19 -3(3) . . . . ? 
C26 C27 C28 C19 -177(3) 2_756 . . . ? 
C30 C27 C28 C19 179(3) . . . . ? 
C29 C27 C28 C23 18(19) 2_756 . . 2_756 ? 
C19 C27 C28 C23 177(3) . . . 2_756 ? 
C22 C27 C28 C23 3(3) 2_756 . . 2_756 ? 
C24 C27 C28 C23 -1.2(13) . . . 2_756 ? 
C25 C27 C28 C23 174(3) . . . 2_756 ? 
C26 C27 C28 C23 -0.5(15) 2_756 . . 2_756 ? 
C30 C27 C28 C23 -4.4(12) . . . 2_756 ? 
C29 C27 C28 C21 23(19) 2_756 . . . ? 
C19 C27 C28 C21 -178(3) . . . . ? 
C22 C27 C28 C21 9(4) 2_756 . . . ? 
C24 C27 C28 C21 4(2) . . . . ? 
C23 C27 C28 C21 5.5(15) 2_756 . . . ? 
C25 C27 C28 C21 180(3) . . . . ? 
C26 C27 C28 C21 5(2) 2_756 . . . ? 
C30 C27 C28 C21 1.0(18) . . . . ? 
C29 C27 C28 C30 21(19) 2_756 . . 2_756 ? 
C19 C27 C28 C30 180(3) . . . 2_756 ? 
C22 C27 C28 C30 6(4) 2_756 . . 2_756 ? 
C24 C27 C28 C30 1.9(15) . . . 2_756 ? 
C23 C27 C28 C30 3.1(12) 2_756 . . 2_756 ? 
C25 C27 C28 C30 177(3) . . . 2_756 ? 
C26 C27 C28 C30 2.6(17) 2_756 . . 2_756 ? 
C30 C27 C28 C30 -1.4(17) . . . 2_756 ? 
C24 C23 C29 C25 -180(8) 2_756 . . 2_756 ? 
C27 C23 C29 C25 180(100) 2_756 . . 2_756 ? 
C30 C23 C29 C25 6(10) . . . 2_756 ? 
C22 C23 C29 C25 -177(9) . . . 2_756 ? 
C30 C23 C29 C25 176(7) 2_756 . . 2_756 ? 
C28 C23 C29 C25 3(7) 2_756 . . 2_756 ? 
C24 C23 C29 C25 15(12) . . . 2_756 ? 
C20 C23 C29 C25 7(8) 2_756 . . 2_756 ? 
C19 C23 C29 C25 -180(100) 2_756 . . 2_756 ? 
C26 C23 C29 C25 -178(8) . . . 2_756 ? 
C24 C23 C29 C19 0(7) 2_756 . . 2_756 ? 
C27 C23 C29 C19 0(5) 2_756 . . 2_756 ? 
C30 C23 C29 C19 -175(5) . . . 2_756 ? 
C22 C23 C29 C19 3(6) . . . 2_756 ? 
C30 C23 C29 C19 -4(7) 2_756 . . 2_756 ? 
C28 C23 C29 C19 -177(7) 2_756 . . 2_756 ? 
C24 C23 C29 C19 -165(4) . . . 2_756 ? 
C20 C23 C29 C19 -174(6) 2_756 . . 2_756 ? 
C25 C23 C29 C19 180(100) 2_756 . . 2_756 ? 
C26 C23 C29 C19 2(7) . . . 2_756 ? 
C24 C23 C29 C27 1(3) 2_756 . . 2_756 ? 
C30 C23 C29 C27 -174(2) . . . 2_756 ? 
C22 C23 C29 C27 3(2) . . . 2_756 ? 
C30 C23 C29 C27 -4(4) 2_756 . . 2_756 ? 
C28 C23 C29 C27 -176(4) 2_756 . . 2_756 ? 
C24 C23 C29 C27 -165(4) . . . 2_756 ? 
C20 C23 C29 C27 -173(2) 2_756 . . 2_756 ? 
C19 C23 C29 C27 0(5) 2_756 . . 2_756 ? 
C25 C23 C29 C27 -180(100) 2_756 . . 2_756 ? 
C26 C23 C29 C27 2(3) . . . 2_756 ? 
C24 C23 C29 C28 177(2) 2_756 . . 2_756 ? 
C27 C23 C29 C28 176(4) 2_756 . . 2_756 ? 
C30 C23 C29 C28 2(4) . . . 2_756 ? 
C22 C23 C29 C28 179(2) . . . 2_756 ? 
C30 C23 C29 C28 172.5(19) 2_756 . . 2_756 ? 
C24 C23 C29 C28 12(6) . . . 2_756 ? 
C20 C23 C29 C28 3(2) 2_756 . . 2_756 ? 
C19 C23 C29 C28 177(7) 2_756 . . 2_756 ? 
C25 C23 C29 C28 -3(7) 2_756 . . 2_756 ? 
C26 C23 C29 C28 178.3(17) . . . 2_756 ? 
C27 C23 C29 C24 -1(3) 2_756 . . 2_756 ? 
C30 C23 C29 C24 -175(4) . . . 2_756 ? 
C22 C23 C29 C24 2.4(19) . . . 2_756 ? 
C30 C23 C29 C24 -4.3(18) 2_756 . . 2_756 ? 
C28 C23 C29 C24 -177(2) 2_756 . . 2_756 ? 
C24 C23 C29 C24 -165(6) . . . 2_756 ? 
C20 C23 C29 C24 -174(2) 2_756 . . 2_756 ? 
C19 C23 C29 C24 0(7) 2_756 . . 2_756 ? 
C25 C23 C29 C24 180(8) 2_756 . . 2_756 ? 
C26 C23 C29 C24 1.4(15) . . . 2_756 ? 
C24 C23 C29 C20 174(2) 2_756 . . 2_756 ? 
C27 C23 C29 C20 173(2) 2_756 . . 2_756 ? 
C30 C23 C29 C20 -1(2) . . . 2_756 ? 
C22 C23 C29 C20 176.2(13) . . . 2_756 ? 
C30 C23 C29 C20 169(2) 2_756 . . 2_756 ? 
C28 C23 C29 C20 -3(2) 2_756 . . 2_756 ? 
C24 C23 C29 C20 8(5) . . . 2_756 ? 
C19 C23 C29 C20 174(6) 2_756 . . 2_756 ? 
C25 C23 C29 C20 -7(8) 2_756 . . 2_756 ? 
C26 C23 C29 C20 175.2(16) . . . 2_756 ? 
C24 C23 C29 C22 -2.4(19) 2_756 . . . ? 
C27 C23 C29 C22 -3(2) 2_756 . . . ? 
C30 C23 C29 C22 -177(2) . . . . ? 
C30 C23 C29 C22 -7(2) 2_756 . . . ? 
C28 C23 C29 C22 -179(2) 2_756 . . . ? 
C24 C23 C29 C22 -168(5) . . . . ? 
C20 C23 C29 C22 -176.2(13) 2_756 . . . ? 
C19 C23 C29 C22 -3(6) 2_756 . . . ? 
C25 C23 C29 C22 177(9) 2_756 . . . ? 
C26 C23 C29 C22 -1.0(15) . . . . ? 
C24 C23 C29 C30 175(4) 2_756 . . . ? 
C27 C23 C29 C30 174(2) 2_756 . . . ? 
C22 C23 C29 C30 177(2) . . . . ? 
C30 C23 C29 C30 170(4) 2_756 . . . ? 
C28 C23 C29 C30 -2(4) 2_756 . . . ? 
C24 C23 C29 C30 9(3) . . . . ? 
C20 C23 C29 C30 1(2) 2_756 . . . ? 
C19 C23 C29 C30 175(5) 2_756 . . . ? 
C25 C23 C29 C30 -6(10) 2_756 . . . ? 
C26 C23 C29 C30 176(3) . . . . ? 
C24 C23 C29 C26 -1.4(15) 2_756 . . . ? 
C27 C23 C29 C26 -2(3) 2_756 . . . ? 
C30 C23 C29 C26 -176(3) . . . . ? 
C22 C23 C29 C26 1.0(15) . . . . ? 
C30 C23 C29 C26 -5.7(18) 2_756 . . . ? 
C28 C23 C29 C26 -178.3(17) 2_756 . . . ? 
C24 C23 C29 C26 -167(6) . . . . ? 
C20 C23 C29 C26 -175.2(16) 2_756 . . . ? 
C19 C23 C29 C26 -2(7) 2_756 . . . ? 
C25 C23 C29 C26 178(8) 2_756 . . . ? 
C26 C22 C29 C25 -179(5) . . . 2_756 ? 
C24 C22 C29 C25 -179(5) 2_756 . . 2_756 ? 
C27 C22 C29 C25 -9(5) 2_756 . . 2_756 ? 
C30 C22 C29 C25 -175(5) 2_756 . . 2_756 ? 
C23 C22 C29 C25 178(6) . . . 2_756 ? 
C21 C22 C29 C25 -177(4) . . . 2_756 ? 
C19 C22 C29 C25 -3(4) 2_756 . . 2_756 ? 
C26 C22 C29 C19 -176(4) . . . 2_756 ? 
C24 C22 C29 C19 -176(3) 2_756 . . 2_756 ? 
C27 C22 C29 C19 -6(4) 2_756 . . 2_756 ? 
C30 C22 C29 C19 -172(3) 2_756 . . 2_756 ? 
C23 C22 C29 C19 -178(3) . . . 2_756 ? 
C21 C22 C29 C19 -174(3) . . . 2_756 ? 
C26 C22 C29 C27 -170(7) . . . 2_756 ? 
C24 C22 C29 C27 -170(6) 2_756 . . 2_756 ? 
C30 C22 C29 C27 -166(5) 2_756 . . 2_756 ? 
C23 C22 C29 C27 -172(6) . . . 2_756 ? 
C21 C22 C29 C27 -168(5) . . . 2_756 ? 
C19 C22 C29 C27 6(4) 2_756 . . 2_756 ? 
C26 C22 C29 C23 3(4) . . . . ? 
C24 C22 C29 C23 3(2) 2_756 . . . ? 
C27 C22 C29 C23 172(6) 2_756 . . . ? 
C30 C22 C29 C23 7(2) 2_756 . . . ? 
C21 C22 C29 C23 5(3) . . . . ? 
C19 C22 C29 C23 178(3) 2_756 . . . ? 
C26 C22 C29 C28 0(11) . . . 2_756 ? 
C24 C22 C29 C28 0(10) 2_756 . . 2_756 ? 
C27 C22 C29 C28 170(12) 2_756 . . 2_756 ? 
C30 C22 C29 C28 4(10) 2_756 . . 2_756 ? 
C23 C22 C29 C28 -3(9) . . . 2_756 ? 
C21 C22 C29 C28 2(11) . . . 2_756 ? 
C19 C22 C29 C28 176(11) 2_756 . . 2_756 ? 
C26 C22 C29 C24 0(3) . . . 2_756 ? 
C27 C22 C29 C24 170(6) 2_756 . . 2_756 ? 
C30 C22 C29 C24 3.7(19) 2_756 . . 2_756 ? 
C23 C22 C29 C24 -3(2) . . . 2_756 ? 
C21 C22 C29 C24 2(2) . . . 2_756 ? 
C19 C22 C29 C24 176(3) 2_756 . . 2_756 ? 
C26 C22 C29 C20 -3(5) . . . 2_756 ? 
C24 C22 C29 C20 -3(3) 2_756 . . 2_756 ? 
C27 C22 C29 C20 167(6) 2_756 . . 2_756 ? 
C30 C22 C29 C20 1(3) 2_756 . . 2_756 ? 
C23 C22 C29 C20 -5.5(19) . . . 2_756 ? 
C21 C22 C29 C20 -1(4) . . . 2_756 ? 
C19 C22 C29 C20 173(4) 2_756 . . 2_756 ? 
C26 C22 C29 C30 1(4) . . . . ? 
C24 C22 C29 C30 1(2) 2_756 . . . ? 
C27 C22 C29 C30 171(5) 2_756 . . . ? 
C30 C22 C29 C30 5.0(19) 2_756 . . . ? 
C23 C22 C29 C30 -1.6(14) . . . . ? 
C21 C22 C29 C30 3(3) . . . . ? 
C19 C22 C29 C30 177(3) 2_756 . . . ? 
C24 C22 C29 C26 0(3) 2_756 . . . ? 
C27 C22 C29 C26 170(7) 2_756 . . . ? 
C30 C22 C29 C26 4(3) 2_756 . . . ? 
C23 C22 C29 C26 -3(4) . . . . ? 
C21 C22 C29 C26 2(3) . . . . ? 
C19 C22 C29 C26 176(4) 2_756 . . . ? 
C30 C26 C29 C25 -171(8) 2_756 . . 2_756 ? 
C22 C26 C29 C25 1(9) . . . 2_756 ? 
C24 C26 C29 C25 -178(10) 2_756 . . 2_756 ? 
C21 C26 C29 C25 -165(14) . . . 2_756 ? 
C20 C26 C29 C25 -179(7) . . . 2_756 ? 
C27 C26 C29 C25 -5(7) 2_756 . . 2_756 ? 
C23 C26 C29 C25 178(9) . . . 2_756 ? 
C23 C26 C29 C25 -176(8) 2_756 . . 2_756 ? 
C30 C26 C29 C19 -168(4) 2_756 . . 2_756 ? 
C22 C26 C29 C19 4(4) . . . 2_756 ? 
C24 C26 C29 C19 -175(5) 2_756 . . 2_756 ? 
C21 C26 C29 C19 -162(14) . . . 2_756 ? 
C20 C26 C29 C19 -176(3) . . . 2_756 ? 
C27 C26 C29 C19 -2(3) 2_756 . . 2_756 ? 
C23 C26 C29 C19 -179(4) . . . 2_756 ? 
C23 C26 C29 C19 -173(2) 2_756 . . 2_756 ? 
C30 C26 C29 C27 -166(5) 2_756 . . 2_756 ? 
C22 C26 C29 C27 6(4) . . . 2_756 ? 
C24 C26 C29 C27 -173(6) 2_756 . . 2_756 ? 
C21 C26 C29 C27 -159(15) . . . 2_756 ? 
C20 C26 C29 C27 -174(3) . . . 2_756 ? 
C23 C26 C29 C27 -177(4) . . . 2_756 ? 
C23 C26 C29 C27 -171(3) 2_756 . . 2_756 ? 
C30 C26 C29 C23 11(4) 2_756 . . . ? 
C22 C26 C29 C23 -177(5) . . . . ? 
C24 C26 C29 C23 4(4) 2_756 . . . ? 
C21 C26 C29 C23 17(15) . . . . ? 
C20 C26 C29 C23 3(3) . . . . ? 
C27 C26 C29 C23 177(4) 2_756 . . . ? 
C23 C26 C29 C23 6(2) 2_756 . . . ? 
C30 C26 C29 C28 8(6) 2_756 . . 2_756 ? 
C22 C26 C29 C28 180(5) . . . 2_756 ? 
C24 C26 C29 C28 0(5) 2_756 . . 2_756 ? 
C21 C26 C29 C28 14(17) . . . 2_756 ? 
C20 C26 C29 C28 0(5) . . . 2_756 ? 
C27 C26 C29 C28 173(6) 2_756 . . 2_756 ? 
C23 C26 C29 C28 -3(3) . . . 2_756 ? 
C23 C26 C29 C28 3(4) 2_756 . . 2_756 ? 
C30 C26 C29 C24 7(4) 2_756 . . 2_756 ? 
C22 C26 C29 C24 179(7) . . . 2_756 ? 
C21 C26 C29 C24 14(13) . . . 2_756 ? 
C20 C26 C29 C24 -1(4) . . . 2_756 ? 
C27 C26 C29 C24 173(6) 2_756 . . 2_756 ? 
C23 C26 C29 C24 -4(4) . . . 2_756 ? 
C23 C26 C29 C24 2(4) 2_756 . . 2_756 ? 
C30 C26 C29 C20 6(4) 2_756 . . 2_756 ? 
C22 C26 C29 C20 178(4) . . . 2_756 ? 
C24 C26 C29 C20 -2(4) 2_756 . . 2_756 ? 
C21 C26 C29 C20 12(15) . . . 2_756 ? 
C20 C26 C29 C20 -3(3) . . . 2_756 ? 
C27 C26 C29 C20 171(4) 2_756 . . 2_756 ? 
C23 C26 C29 C20 -5.5(18) . . . 2_756 ? 
C23 C26 C29 C20 0.3(18) 2_756 . . 2_756 ? 
C30 C26 C29 C22 -172(7) 2_756 . . . ? 
C24 C26 C29 C22 -179(7) 2_756 . . . ? 
C21 C26 C29 C22 -166(17) . . . . ? 
C20 C26 C29 C22 180(5) . . . . ? 
C27 C26 C29 C22 -6(4) 2_756 . . . ? 
C23 C26 C29 C22 177(5) . . . . ? 
C23 C26 C29 C22 -177(4) 2_756 . . . ? 
C30 C26 C29 C30 9(4) 2_756 . . . ? 
C22 C26 C29 C30 -179(4) . . . . ? 
C24 C26 C29 C30 2(4) 2_756 . . . ? 
C21 C26 C29 C30 15(15) . . . . ? 
C20 C26 C29 C30 1(2) . . . . ? 
C27 C26 C29 C30 175(3) 2_756 . . . ? 
C23 C26 C29 C30 -2.2(19) . . . . ? 
C23 C26 C29 C30 3.7(11) 2_756 . . . ? 
C22 C24 C30 C26 -6(4) 2_756 . . 2_756 ? 
C23 C24 C30 C26 175(4) 2_756 . . 2_756 ? 
C27 C24 C30 C26 -22(7) . . . 2_756 ? 
C29 C24 C30 C26 -156(16) 2_756 . . 2_756 ? 
C23 C24 C30 C26 172(4) . . . 2_756 ? 
C21 C24 C30 C26 2(3) 2_756 . . 2_756 ? 
C30 C24 C30 C26 173(4) 2_756 . . 2_756 ? 
C24 C24 C30 C26 173(4) 2_756 . . 2_756 ? 
C19 C24 C30 C26 -30(10) . . . 2_756 ? 
C20 C24 C30 C26 101(25) 2_756 . . 2_756 ? 
C22 C24 C30 C21 -8(5) 2_756 . . 2_756 ? 
C23 C24 C30 C21 173(3) 2_756 . . 2_756 ? 
C26 C24 C30 C21 -2(3) 2_756 . . 2_756 ? 
C27 C24 C30 C21 -24(8) . . . 2_756 ? 
C29 C24 C30 C21 -158(15) 2_756 . . 2_756 ? 
C23 C24 C30 C21 170(5) . . . 2_756 ? 
C30 C24 C30 C21 171(4) 2_756 . . 2_756 ? 
C24 C24 C30 C21 171(4) 2_756 . . 2_756 ? 
C19 C24 C30 C21 -32(11) . . . 2_756 ? 
C20 C24 C30 C21 99(25) 2_756 . . 2_756 ? 
C23 C24 C30 C22 -179(5) 2_756 . . 2_756 ? 
C26 C24 C30 C22 6(4) 2_756 . . 2_756 ? 
C27 C24 C30 C22 -16(4) . . . 2_756 ? 
C29 C24 C30 C22 -149(18) 2_756 . . 2_756 ? 
C23 C24 C30 C22 179(2) . . . 2_756 ? 
C21 C24 C30 C22 8(5) 2_756 . . 2_756 ? 
C30 C24 C30 C22 180(2) 2_756 . . 2_756 ? 
C24 C24 C30 C22 180(2) 2_756 . . 2_756 ? 
C19 C24 C30 C22 -24(8) . . . 2_756 ? 
C20 C24 C30 C22 107(25) 2_756 . . 2_756 ? 
C22 C24 C30 C23 -179(2) 2_756 . . . ? 
C23 C24 C30 C23 3(5) 2_756 . . . ? 
C26 C24 C30 C23 -172(4) 2_756 . . . ? 
C27 C24 C30 C23 166(4) . . . . ? 
C29 C24 C30 C23 32(18) 2_756 . . . ? 
C21 C24 C30 C23 -170(5) 2_756 . . . ? 
C30 C24 C30 C23 0.8(16) 2_756 . . . ? 
C24 C24 C30 C23 0.8(16) 2_756 . . . ? 
C19 C24 C30 C23 157(8) . . . . ? 
C20 C24 C30 C23 -72(24) 2_756 . . . ? 
C22 C24 C30 C20 -107(25) 2_756 . . 2_756 ? 
C23 C24 C30 C20 74(26) 2_756 . . 2_756 ? 
C26 C24 C30 C20 -101(25) 2_756 . . 2_756 ? 
C27 C24 C30 C20 -123(23) . . . 2_756 ? 
C29 C24 C30 C20 104(23) 2_756 . . 2_756 ? 
C23 C24 C30 C20 72(24) . . . 2_756 ? 
C21 C24 C30 C20 -99(25) 2_756 . . 2_756 ? 
C30 C24 C30 C20 72(25) 2_756 . . 2_756 ? 
C24 C24 C30 C20 72(25) 2_756 . . 2_756 ? 
C19 C24 C30 C20 -131(20) . . . 2_756 ? 
C22 C24 C30 C23 179(5) 2_756 . . 2_756 ? 
C26 C24 C30 C23 -175(4) 2_756 . . 2_756 ? 
C27 C24 C30 C23 163(8) . . . 2_756 ? 
C29 C24 C30 C23 29(15) 2_756 . . 2_756 ? 
C23 C24 C30 C23 -3(5) . . . 2_756 ? 
C21 C24 C30 C23 -173(3) 2_756 . . 2_756 ? 
C30 C24 C30 C23 -2(3) 2_756 . . 2_756 ? 
C24 C24 C30 C23 -2(3) 2_756 . . 2_756 ? 
C19 C24 C30 C23 155(11) . . . 2_756 ? 
C20 C24 C30 C23 -74(26) 2_756 . . 2_756 ? 
C22 C24 C30 C24 -180(2) 2_756 . . 2_756 ? 
C23 C24 C30 C24 2(3) 2_756 . . 2_756 ? 
C26 C24 C30 C24 -173(4) 2_756 . . 2_756 ? 
C27 C24 C30 C24 165(5) . . . 2_756 ? 
C29 C24 C30 C24 31(17) 2_756 . . 2_756 ? 
C23 C24 C30 C24 -0.8(16) . . . 2_756 ? 
C21 C24 C30 C24 -171(4) 2_756 . . 2_756 ? 
C30 C24 C30 C24 0.000(2) 2_756 . . 2_756 ? 
C19 C24 C30 C24 156(9) . . . 2_756 ? 
C20 C24 C30 C24 -72(25) 2_756 . . 2_756 ? 
C22 C24 C30 C29 -175(2) 2_756 . . . ? 
C23 C24 C30 C29 6(5) 2_756 . . . ? 
C26 C24 C30 C29 -169(5) 2_756 . . . ? 
C27 C24 C30 C29 169(4) . . . . ? 
C29 C24 C30 C29 36(18) 2_756 . . . ? 
C23 C24 C30 C29 3.8(12) . . . . ? 
C21 C24 C30 C29 -167(6) 2_756 . . . ? 
C30 C24 C30 C29 5(2) 2_756 . . . ? 
C24 C24 C30 C29 5(2) 2_756 . . . ? 
C19 C24 C30 C29 161(7) . . . . ? 
C20 C24 C30 C29 -68(24) 2_756 . . . ? 
C22 C24 C30 C28 -166(5) 2_756 . . 2_756 ? 
C23 C24 C30 C28 16(9) 2_756 . . 2_756 ? 
C26 C24 C30 C28 -159(8) 2_756 . . 2_756 ? 
C27 C24 C30 C28 179(4) . . . 2_756 ? 
C29 C24 C30 C28 45(20) 2_756 . . 2_756 ? 
C23 C24 C30 C28 13(5) . . . 2_756 ? 
C21 C24 C30 C28 -157(9) 2_756 . . 2_756 ? 
C30 C24 C30 C28 14(6) 2_756 . . 2_756 ? 
C24 C24 C30 C28 14(6) 2_756 . . 2_756 ? 
C19 C24 C30 C28 170(5) . . . 2_756 ? 
C20 C24 C30 C28 -58(22) 2_756 . . 2_756 ? 
C22 C24 C30 C27 16(4) 2_756 . . . ? 
C23 C24 C30 C27 -163(8) 2_756 . . . ? 
C26 C24 C30 C27 22(7) 2_756 . . . ? 
C29 C24 C30 C27 -134(19) 2_756 . . . ? 
C23 C24 C30 C27 -166(4) . . . . ? 
C21 C24 C30 C27 24(8) 2_756 . . . ? 
C30 C24 C30 C27 -165(5) 2_756 . . . ? 
C24 C24 C30 C27 -165(5) 2_756 . . . ? 
C19 C24 C30 C27 -8(5) . . . . ? 
C20 C24 C30 C27 123(23) 2_756 . . . ? 
C22 C24 C30 C30 -180(2) 2_756 . . 2_756 ? 
C23 C24 C30 C30 2(3) 2_756 . . 2_756 ? 
C26 C24 C30 C30 -173(4) 2_756 . . 2_756 ? 
C27 C24 C30 C30 165(5) . . . 2_756 ? 
C29 C24 C30 C30 31(17) 2_756 . . 2_756 ? 
C23 C24 C30 C30 -0.8(16) . . . 2_756 ? 
C21 C24 C30 C30 -171(4) 2_756 . . 2_756 ? 
C24 C24 C30 C30 0.000(3) 2_756 . . 2_756 ? 
C19 C24 C30 C30 156(9) . . . 2_756 ? 
C20 C24 C30 C30 -72(25) 2_756 . . 2_756 ? 
C24 C23 C30 C26 -47(32) 2_756 . . 2_756 ? 
C29 C23 C30 C26 127(31) . . . 2_756 ? 
C27 C23 C30 C26 100(34) 2_756 . . 2_756 ? 
C22 C23 C30 C26 -48(32) . . . 2_756 ? 
C30 C23 C30 C26 -46(31) 2_756 . . 2_756 ? 
C28 C23 C30 C26 128(31) 2_756 . . 2_756 ? 
C24 C23 C30 C26 -45(30) . . . 2_756 ? 
C20 C23 C30 C26 126(31) 2_756 . . 2_756 ? 
C19 C23 C30 C26 124(31) 2_756 . . 2_756 ? 
C25 C23 C30 C26 128(31) 2_756 . . 2_756 ? 
C26 C23 C30 C26 -49(32) . . . 2_756 ? 
C24 C23 C30 C24 -2(4) 2_756 . . . ? 
C29 C23 C30 C24 172(3) . . . . ? 
C27 C23 C30 C24 145(12) 2_756 . . . ? 
C22 C23 C30 C24 -3(4) . . . . ? 
C30 C23 C30 C24 -1.0(18) 2_756 . . . ? 
C28 C23 C30 C24 173(2) 2_756 . . . ? 
C20 C23 C30 C24 171(3) 2_756 . . . ? 
C19 C23 C30 C24 169(2) 2_756 . . . ? 
C25 C23 C30 C24 173.2(18) 2_756 . . . ? 
C26 C23 C30 C24 -4(3) . . . . ? 
C24 C23 C30 C21 -174(2) 2_756 . . 2_756 ? 
C29 C23 C30 C21 0(4) . . . 2_756 ? 
C27 C23 C30 C21 -27(14) 2_756 . . 2_756 ? 
C22 C23 C30 C21 -175(2) . . . 2_756 ? 
C30 C23 C30 C21 -173(3) 2_756 . . 2_756 ? 
C28 C23 C30 C21 1(3) 2_756 . . 2_756 ? 
C24 C23 C30 C21 -172(4) . . . 2_756 ? 
C20 C23 C30 C21 -1(2) 2_756 . . 2_756 ? 
C19 C23 C30 C21 -3(4) 2_756 . . 2_756 ? 
C25 C23 C30 C21 1(3) 2_756 . . 2_756 ? 
C26 C23 C30 C21 -176(2) . . . 2_756 ? 
C24 C23 C30 C22 -4(5) 2_756 . . 2_756 ? 
C29 C23 C30 C22 170(3) . . . 2_756 ? 
C27 C23 C30 C22 143(12) 2_756 . . 2_756 ? 
C22 C23 C30 C22 -4(6) . . . 2_756 ? 
C30 C23 C30 C22 -3(3) 2_756 . . 2_756 ? 
C28 C23 C30 C22 172(4) 2_756 . . 2_756 ? 
C24 C23 C30 C22 -2(3) . . . 2_756 ? 
C20 C23 C30 C22 169(4) 2_756 . . 2_756 ? 
C19 C23 C30 C22 168(3) 2_756 . . 2_756 ? 
C25 C23 C30 C22 172(3) 2_756 . . 2_756 ? 
C26 C23 C30 C22 -5(4) . . . 2_756 ? 
C24 C23 C30 C20 -173(2) 2_756 . . 2_756 ? 
C29 C23 C30 C20 1(3) . . . 2_756 ? 
C27 C23 C30 C20 -26(13) 2_756 . . 2_756 ? 
C22 C23 C30 C20 -174(3) . . . 2_756 ? 
C30 C23 C30 C20 -171.9(17) 2_756 . . 2_756 ? 
C28 C23 C30 C20 2.5(15) 2_756 . . 2_756 ? 
C24 C23 C30 C20 -171(3) . . . 2_756 ? 
C19 C23 C30 C20 -2(3) 2_756 . . 2_756 ? 
C25 C23 C30 C20 2.3(17) 2_756 . . 2_756 ? 
C26 C23 C30 C20 -174.8(16) . . . 2_756 ? 
C24 C23 C30 C23 -1(2) 2_756 . . 2_756 ? 
C29 C23 C30 C23 173(3) . . . 2_756 ? 
C27 C23 C30 C23 146(13) 2_756 . . 2_756 ? 
C22 C23 C30 C23 -2(2) . . . 2_756 ? 
C30 C23 C30 C23 0.000(2) 2_756 . . 2_756 ? 
C28 C23 C30 C23 174.4(13) 2_756 . . 2_756 ? 
C24 C23 C30 C23 1.0(18) . . . 2_756 ? 
C20 C23 C30 C23 171.9(17) 2_756 . . 2_756 ? 
C19 C23 C30 C23 170(2) 2_756 . . 2_756 ? 
C25 C23 C30 C23 174.2(15) 2_756 . . 2_756 ? 
C26 C23 C30 C23 -2.9(17) . . . 2_756 ? 
C29 C23 C30 C24 174(4) . . . 2_756 ? 
C27 C23 C30 C24 147(14) 2_756 . . 2_756 ? 
C22 C23 C30 C24 -0.7(19) . . . 2_756 ? 
C30 C23 C30 C24 1(2) 2_756 . . 2_756 ? 
C28 C23 C30 C24 176(3) 2_756 . . 2_756 ? 
C24 C23 C30 C24 2(4) . . . 2_756 ? 
C20 C23 C30 C24 173(2) 2_756 . . 2_756 ? 
C19 C23 C30 C24 172(4) 2_756 . . 2_756 ? 
C25 C23 C30 C24 175(3) 2_756 . . 2_756 ? 
C26 C23 C30 C24 -1.7(17) . . . 2_756 ? 
C24 C23 C30 C29 -174(4) 2_756 . . . ? 
C27 C23 C30 C29 -27(12) 2_756 . . . ? 
C22 C23 C30 C29 -175(4) . . . . ? 
C30 C23 C30 C29 -173(3) 2_756 . . . ? 
C28 C23 C30 C29 1(2) 2_756 . . . ? 
C24 C23 C30 C29 -172(3) . . . . ? 
C20 C23 C30 C29 -1(3) 2_756 . . . ? 
C19 C23 C30 C29 -3(2) 2_756 . . . ? 
C25 C23 C30 C29 1(2) 2_756 . . . ? 
C26 C23 C30 C29 -176(4) . . . . ? 
C24 C23 C30 C28 -176(3) 2_756 . . 2_756 ? 
C29 C23 C30 C28 -1(2) . . . 2_756 ? 
C27 C23 C30 C28 -29(13) 2_756 . . 2_756 ? 
C22 C23 C30 C28 -176(3) . . . 2_756 ? 
C30 C23 C30 C28 -174.4(13) 2_756 . . 2_756 ? 
C24 C23 C30 C28 -173(2) . . . 2_756 ? 
C20 C23 C30 C28 -2.5(15) 2_756 . . 2_756 ? 
C19 C23 C30 C28 -4(2) 2_756 . . 2_756 ? 
C25 C23 C30 C28 -0.2(13) 2_756 . . 2_756 ? 
C26 C23 C30 C28 -177.3(18) . . . 2_756 ? 
C24 C23 C30 C27 3(3) 2_756 . . . ? 
C29 C23 C30 C27 177(2) . . . . ? 
C27 C23 C30 C27 150(12) 2_756 . . . ? 
C22 C23 C30 C27 2(3) . . . . ? 
C30 C23 C30 C27 3.8(13) 2_756 . . . ? 
C28 C23 C30 C27 178.2(16) 2_756 . . . ? 
C24 C23 C30 C27 4.8(14) . . . . ? 
C20 C23 C30 C27 176(2) 2_756 . . . ? 
C19 C23 C30 C27 174.2(19) 2_756 . . . ? 
C25 C23 C30 C27 178.0(13) 2_756 . . . ? 
C26 C23 C30 C27 1(3) . . . . ? 
C24 C23 C30 C30 -1(2) 2_756 . . 2_756 ? 
C29 C23 C30 C30 173(3) . . . 2_756 ? 
C27 C23 C30 C30 146(13) 2_756 . . 2_756 ? 
C22 C23 C30 C30 -2(2) . . . 2_756 ? 
C28 C23 C30 C30 174.4(13) 2_756 . . 2_756 ? 
C24 C23 C30 C30 1.0(18) . . . 2_756 ? 
C20 C23 C30 C30 171.9(17) 2_756 . . 2_756 ? 
C19 C23 C30 C30 170(2) 2_756 . . 2_756 ? 
C25 C23 C30 C30 174.2(15) 2_756 . . 2_756 ? 
C26 C23 C30 C30 -2.9(17) . . . 2_756 ? 
C25 C29 C30 C26 29(15) 2_756 . . 2_756 ? 
C19 C29 C30 C26 -98(61) 2_756 . . 2_756 ? 
C27 C29 C30 C26 -148(13) 2_756 . . 2_756 ? 
C23 C29 C30 C26 -154(14) . . . 2_756 ? 
C28 C29 C30 C26 28(14) 2_756 . . 2_756 ? 
C24 C29 C30 C26 -151(14) 2_756 . . 2_756 ? 
C20 C29 C30 C26 25(13) 2_756 . . 2_756 ? 
C22 C29 C30 C26 -152(14) . . . 2_756 ? 
C26 C29 C30 C26 -151(13) . . . 2_756 ? 
C25 C29 C30 C24 173(3) 2_756 . . . ? 
C19 C29 C30 C24 46(59) 2_756 . . . ? 
C27 C29 C30 C24 -3(4) 2_756 . . . ? 
C23 C29 C30 C24 -9(3) . . . . ? 
C28 C29 C30 C24 173(3) 2_756 . . . ? 
C24 C29 C30 C24 -6(3) 2_756 . . . ? 
C20 C29 C30 C24 169(3) 2_756 . . . ? 
C22 C29 C30 C24 -7(3) . . . . ? 
C26 C29 C30 C24 -7(3) . . . . ? 
C25 C29 C30 C21 3(4) 2_756 . . 2_756 ? 
C19 C29 C30 C21 -124(59) 2_756 . . 2_756 ? 
C27 C29 C30 C21 -173(3) 2_756 . . 2_756 ? 
C23 C29 C30 C21 180(3) . . . 2_756 ? 
C28 C29 C30 C21 2(2) 2_756 . . 2_756 ? 
C24 C29 C30 C21 -177(2) 2_756 . . 2_756 ? 
C20 C29 C30 C21 -1(2) 2_756 . . 2_756 ? 
C22 C29 C30 C21 -178(2) . . . 2_756 ? 
C26 C29 C30 C21 -177.3(18) . . . 2_756 ? 
C25 C29 C30 C22 156(10) 2_756 . . 2_756 ? 
C19 C29 C30 C22 29(63) 2_756 . . 2_756 ? 
C27 C29 C30 C22 -20(11) 2_756 . . 2_756 ? 
C23 C29 C30 C22 -27(10) . . . 2_756 ? 
C28 C29 C30 C22 155(10) 2_756 . . 2_756 ? 
C24 C29 C30 C22 -24(10) 2_756 . . 2_756 ? 
C20 C29 C30 C22 152(11) 2_756 . . 2_756 ? 
C22 C29 C30 C22 -25(11) . . . 2_756 ? 
C26 C29 C30 C22 -24(10) . . . 2_756 ? 
C25 C29 C30 C23 -177(5) 2_756 . . . ? 
C19 C29 C30 C23 56(59) 2_756 . . . ? 
C27 C29 C30 C23 7(3) 2_756 . . . ? 
C28 C29 C30 C23 -178(4) 2_756 . . . ? 
C24 C29 C30 C23 3(2) 2_756 . . . ? 
C20 C29 C30 C23 179(3) 2_756 . . . ? 
C22 C29 C30 C23 2(2) . . . . ? 
C26 C29 C30 C23 3(2) . . . . ? 
C25 C29 C30 C20 4(3) 2_756 . . 2_756 ? 
C19 C29 C30 C20 -123(59) 2_756 . . 2_756 ? 
C27 C29 C30 C20 -172(3) 2_756 . . 2_756 ? 
C23 C29 C30 C20 -179(3) . . . 2_756 ? 
C28 C29 C30 C20 3(2) 2_756 . . 2_756 ? 
C24 C29 C30 C20 -175.6(19) 2_756 . . 2_756 ? 
C22 C29 C30 C20 -176.2(19) . . . 2_756 ? 
C26 C29 C30 C20 -176.0(16) . . . 2_756 ? 
C25 C29 C30 C23 176(3) 2_756 . . 2_756 ? 
C19 C29 C30 C23 49(59) 2_756 . . 2_756 ? 
C27 C29 C30 C23 0(3) 2_756 . . 2_756 ? 
C23 C29 C30 C23 -7(3) . . . 2_756 ? 
C28 C29 C30 C23 175.2(18) 2_756 . . 2_756 ? 
C24 C29 C30 C23 -3.9(13) 2_756 . . 2_756 ? 
C20 C29 C30 C23 172(2) 2_756 . . 2_756 ? 
C22 C29 C30 C23 -4.5(14) . . . 2_756 ? 
C26 C29 C30 C23 -4.3(13) . . . 2_756 ? 
C25 C29 C30 C24 180(4) 2_756 . . 2_756 ? 
C19 C29 C30 C24 53(59) 2_756 . . 2_756 ? 
C27 C29 C30 C24 3(2) 2_756 . . 2_756 ? 
C23 C29 C30 C24 -3(2) . . . 2_756 ? 
C28 C29 C30 C24 179(2) 2_756 . . 2_756 ? 
C20 C29 C30 C24 175.6(19) 2_756 . . 2_756 ? 
C22 C29 C30 C24 -0.6(10) . . . 2_756 ? 
C26 C29 C30 C24 -0.4(9) . . . 2_756 ? 
C25 C29 C30 C28 1(3) 2_756 . . 2_756 ? 
C19 C29 C30 C28 -126(59) 2_756 . . 2_756 ? 
C27 C29 C30 C28 -176(4) 2_756 . . 2_756 ? 
C23 C29 C30 C28 178(4) . . . 2_756 ? 
C24 C29 C30 C28 -179(2) 2_756 . . 2_756 ? 
C20 C29 C30 C28 -3(2) 2_756 . . 2_756 ? 
C22 C29 C30 C28 -180(2) . . . 2_756 ? 
C26 C29 C30 C28 -179.4(19) . . . 2_756 ? 
C25 C29 C30 C27 178(3) 2_756 . . . ? 
C19 C29 C30 C27 51(59) 2_756 . . . ? 
C27 C29 C30 C27 2(4) 2_756 . . . ? 
C23 C29 C30 C27 -4(3) . . . . ? 
C28 C29 C30 C27 178(2) 2_756 . . . ? 
C24 C29 C30 C27 -1(2) 2_756 . . . ? 
C20 C29 C30 C27 174(3) 2_756 . . . ? 
C22 C29 C30 C27 -2(2) . . . . ? 
C26 C29 C30 C27 -2(2) . . . . ? 
C25 C29 C30 C30 177(3) 2_756 . . 2_756 ? 
C19 C29 C30 C30 50(59) 2_756 . . 2_756 ? 
C27 C29 C30 C30 1(3) 2_756 . . 2_756 ? 
C23 C29 C30 C30 -5(2) . . . 2_756 ? 
C28 C29 C30 C30 177(2) 2_756 . . 2_756 ? 
C24 C29 C30 C30 -2.2(10) 2_756 . . 2_756 ? 
C20 C29 C30 C30 173(2) 2_756 . . 2_756 ? 
C22 C29 C30 C30 -2.8(11) . . . 2_756 ? 
C26 C29 C30 C30 -2.6(11) . . . 2_756 ? 
C29 C27 C30 C26 167(4) 2_756 . . 2_756 ? 
C19 C27 C30 C26 172(9) . . . 2_756 ? 
C22 C27 C30 C26 -2(5) 2_756 . . 2_756 ? 
C24 C27 C30 C26 155(8) . . . 2_756 ? 
C23 C27 C30 C26 165(4) 2_756 . . 2_756 ? 
C25 C27 C30 C26 168(4) . . . 2_756 ? 
C28 C27 C30 C26 169(4) . . . 2_756 ? 
C29 C27 C30 C24 12(5) 2_756 . . . ? 
C19 C27 C30 C24 17(9) . . . . ? 
C22 C27 C30 C24 -157(6) 2_756 . . . ? 
C23 C27 C30 C24 10(5) 2_756 . . . ? 
C25 C27 C30 C24 13(6) . . . . ? 
C26 C27 C30 C24 -155(8) 2_756 . . . ? 
C28 C27 C30 C24 14(5) . . . . ? 
C29 C27 C30 C21 173(3) 2_756 . . 2_756 ? 
C19 C27 C30 C21 178(8) . . . 2_756 ? 
C22 C27 C30 C21 4(3) 2_756 . . 2_756 ? 
C24 C27 C30 C21 161(7) . . . 2_756 ? 
C23 C27 C30 C21 171(3) 2_756 . . 2_756 ? 
C25 C27 C30 C21 175(2) . . . 2_756 ? 
C26 C27 C30 C21 6(3) 2_756 . . 2_756 ? 
C28 C27 C30 C21 175(2) . . . 2_756 ? 
C29 C27 C30 C22 169(4) 2_756 . . 2_756 ? 
C19 C27 C30 C22 174(10) . . . 2_756 ? 
C24 C27 C30 C22 157(6) . . . 2_756 ? 
C23 C27 C30 C22 167(3) 2_756 . . 2_756 ? 
C25 C27 C30 C22 170(4) . . . 2_756 ? 
C26 C27 C30 C22 2(5) 2_756 . . 2_756 ? 
C28 C27 C30 C22 171(3) . . . 2_756 ? 
C29 C27 C30 C23 -4(3) 2_756 . . . ? 
C19 C27 C30 C23 1(9) . . . . ? 
C22 C27 C30 C23 -173(3) 2_756 . . . ? 
C24 C27 C30 C23 -16(5) . . . . ? 
C23 C27 C30 C23 -6(2) 2_756 . . . ? 
C25 C27 C30 C23 -2(3) . . . . ? 
C26 C27 C30 C23 -171(5) 2_756 . . . ? 
C28 C27 C30 C23 -2(2) . . . . ? 
C29 C27 C30 C20 159(7) 2_756 . . 2_756 ? 
C19 C27 C30 C20 165(9) . . . 2_756 ? 
C22 C27 C30 C20 -10(8) 2_756 . . 2_756 ? 
C24 C27 C30 C20 147(10) . . . 2_756 ? 
C23 C27 C30 C20 157(8) 2_756 . . 2_756 ? 
C25 C27 C30 C20 161(7) . . . 2_756 ? 
C26 C27 C30 C20 -7(6) 2_756 . . 2_756 ? 
C28 C27 C30 C20 162(7) . . . 2_756 ? 
C29 C27 C30 C23 2(2) 2_756 . . 2_756 ? 
C19 C27 C30 C23 7(8) . . . 2_756 ? 
C22 C27 C30 C23 -167(3) 2_756 . . 2_756 ? 
C24 C27 C30 C23 -10(5) . . . 2_756 ? 
C25 C27 C30 C23 3.6(17) . . . 2_756 ? 
C26 C27 C30 C23 -165(4) 2_756 . . 2_756 ? 
C28 C27 C30 C23 4.4(11) . . . 2_756 ? 
C29 C27 C30 C24 -3(2) 2_756 . . 2_756 ? 
C19 C27 C30 C24 2(9) . . . 2_756 ? 
C22 C27 C30 C24 -172(3) 2_756 . . 2_756 ? 
C24 C27 C30 C24 -15(5) . . . 2_756 ? 
C23 C27 C30 C24 -5.0(12) 2_756 . . 2_756 ? 
C25 C27 C30 C24 -1(2) . . . 2_756 ? 
C26 C27 C30 C24 -170(4) 2_756 . . 2_756 ? 
C28 C27 C30 C24 -0.6(15) . . . 2_756 ? 
C29 C27 C30 C29 -2(4) 2_756 . . . ? 
C19 C27 C30 C29 3(10) . . . . ? 
C22 C27 C30 C29 -171(3) 2_756 . . . ? 
C24 C27 C30 C29 -14(5) . . . . ? 
C23 C27 C30 C29 -4(2) 2_756 . . . ? 
C25 C27 C30 C29 0(4) . . . . ? 
C26 C27 C30 C29 -169(5) 2_756 . . . ? 
C28 C27 C30 C29 0(3) . . . . ? 
C29 C27 C30 C28 8(13) 2_756 . . 2_756 ? 
C19 C27 C30 C28 13(18) . . . 2_756 ? 
C22 C27 C30 C28 -161(12) 2_756 . . 2_756 ? 
C24 C27 C30 C28 -4(12) . . . 2_756 ? 
C23 C27 C30 C28 6(12) 2_756 . . 2_756 ? 
C25 C27 C30 C28 10(13) . . . 2_756 ? 
C26 C27 C30 C28 -159(15) 2_756 . . 2_756 ? 
C28 C27 C30 C28 10(13) . . . 2_756 ? 
C29 C27 C30 C30 -1(2) 2_756 . . 2_756 ? 
C19 C27 C30 C30 4(9) . . . 2_756 ? 
C22 C27 C30 C30 -170(3) 2_756 . . 2_756 ? 
C24 C27 C30 C30 -13(5) . . . 2_756 ? 
C23 C27 C30 C30 -3.2(11) 2_756 . . 2_756 ? 
C25 C27 C30 C30 0(2) . . . 2_756 ? 
C26 C27 C30 C30 -168(5) 2_756 . . 2_756 ? 
C28 C27 C30 C30 1.2(15) . . . 2_756 ? 
 
_diffrn_measured_fraction_theta_max    0.887 
_diffrn_reflns_theta_full              28.37 
_diffrn_measured_fraction_theta_full   0.887 
_refine_diff_density_max    0.579 
_refine_diff_density_min   -0.432 
_refine_diff_density_rms    0.061 

#===END
